# Supplementary material for: Molecular Characterization of Chimeric Staphylococcus aureus Strains from Waterfowl
Source: MDPI journal article supplement (doi:10.3390/microorganisms12010096), 2024-01-03
Supplement: s1 [file s1]

| Number/<br>Position in<br>the figures | Gene ID           | ID in PubMLST cg scheme | ED133 vs. swan<br>isolate 15V8707 | X22 vs. swan isolate<br>15V8707 | CC522 goat isolate<br>17CS1042 vs. swan<br>isolate 15V8707 | ED133 vs. duck<br>isolate V315 | X22 vs. duck isolate<br>V315 | CC522 goat isolate<br>17CS1042 vs. duck<br>isolate V315 | ED133 vs. duck<br>isolate V482 | X22 vs. duck isolate<br>V482 | CC522 goat isolate<br>17CS1042 vs. duck<br>isolate V482 |
|---------------------------------------|-------------------|-------------------------|-----------------------------------|---------------------------------|------------------------------------------------------------|--------------------------------|------------------------------|---------------------------------------------------------|--------------------------------|------------------------------|---------------------------------------------------------|
| >0001                                 | dnaA              | SAUR0001 (SAR_RS00005)  | 0.81                              | 0.07                            | 1.10                                                       | 0.73                           | 0.00                         | 1.03                                                    | 0.81                           | 0.07                         | 1.10                                                    |
| >0002                                 | dnaN              | SAUR0002 (SAR_RS00010)  | 0.71                              | 0.09                            | 0.27                                                       | 0.71                           | 0.09                         | 0.27                                                    | 0.88                           | 0.27                         | 0.44                                                    |
| >0003                                 | yaaA              | SAUR0003 (SAR_RS00015)  | 0.41                              | 0.00                            | 0.41                                                       | 0.41                           | 0.00                         | 0.41                                                    | 0.41                           | 0.00                         | 0.41                                                    |
| >0004                                 | recF              | SAUR0004 (SAR_RS00020)  | 0.18                              | 0.09                            | 0.36                                                       | 0.18                           | 0.09                         | 0.36                                                    | 0.18                           | 0.09                         | 0.36                                                    |
| >0005                                 | gyrB              | SAUR0005 (SAR_RS00025)  | 0.47                              | 0.00                            | 0.62                                                       | 0.47                           | 0.00                         | 0.62                                                    | 0.47                           | 0.00                         | 0.62                                                    |
| >0006                                 | gyrA              | SAUR0006 (SAR_RS00030)  | 0.34                              | 1.27                            | 0.67                                                       | 1.61                           | 0.07                         | 1.65                                                    | 1.61                           | 0.07                         | 1.65                                                    |
| >0007                                 | nnrD              | SAUR0007 (SAR_RS00035)  | 0.12                              | 1.68                            | 0.24                                                       | 1.56                           | 0.00                         | 1.68                                                    | 1.56                           | 0.00                         | 1.68                                                    |
| >0008                                 | hutH              | SAUR0008 (SAR_RS00040)  | 0.00                              | 1.32                            | 0.62                                                       | 1.32                           | 0.00                         | 1.32                                                    | 1.39                           | 0.07                         | 1.39                                                    |
| >0009                                 | serS              | SAUR0009 (SAR_RS00045)  | 0.00                              | 0.62                            | 0.66                                                       | 0.62                           | 0.00                         | 0.47                                                    | 0.70                           | 0.08                         | 0.54                                                    |
| >0010                                 | atcYygaZ          | SAUR0010 (SAR_RS00050)  | 0.58                              | 1.58                            | 0.29                                                       | 1.58                           | 0.00                         | 1.58                                                    | 1.58                           | 0.00                         | 1.58                                                    |
| >0011                                 | aztD              | SAUR0011 (SAR_RS00055)  | 0.00                              | 1.21                            | 1.21                                                       | 1.52                           | 0.30                         | 1.52                                                    | 1.52                           | 0.30                         | 1.52                                                    |
| >0012                                 | metX              | SAUR0012 (SAR_RS00060)  | 0.10                              | 2.27                            | 1.65                                                       | 2.00                           | 2.17                         | 2.99                                                    | 2.17                           | 0.00                         | 2.99                                                    |
| >0013                                 | yybS=DUF2232      | SAUR0013 (SAR_RS00065)  | 0.11                              | 0.76                            | 0.54                                                       | 0.65                           | 0.00                         | 0.43                                                    | 0.65                           | 0.00                         | 0.43                                                    |
| >0014                                 | gdpP              | SAUR0014 (SAR_RS00070)  | 0.00                              | 1.22                            | 0.66                                                       | 1.22                           | 0.00                         | 1.27                                                    | 1.22                           | 0.00                         | 1.27                                                    |
| >0015                                 | rplI              | SAUR0015 (SAR_RS00075)  | 0.00                              | 0.67                            | 0.45                                                       | 0.67                           | 0.00                         | 0.67                                                    | 0.67                           | 0.00                         | 0.67                                                    |
| >0016                                 | dnaC              | SAUR0016 (SAR_RS00080)  | 0.00                              | 1.28                            | 0.86                                                       | 1.28                           | 0.00                         | 1.86                                                    | 1.28                           | 0.00                         | 1.86                                                    |
| >0017                                 | purA              | SAUR0017 (SAR_RS00085)  | 0.00                              | 2.26                            | 0.47                                                       | 2.26                           | 0.00                         | 2.57                                                    | 2.26                           | 0.00                         | 2.57                                                    |
| >0018                                 | walR=yycF=vicR    | SAUR0020 (SAR_RS00100)  | 0.00                              | 1.00                            | 1.00                                                       | 1.00                           | 0.00                         | 1.14                                                    | 1.14                           | 0.14                         | 1.28                                                    |
| >0019                                 | walK              | SAUR0021 (SAR_RS00105)  | 0.00                              | 0.71                            | 0.66                                                       | 0.71                           | 0.00                         | 0.60                                                    | 0.82                           | 0.11                         | 0.71                                                    |
| >0020                                 | walH=yycH         | SAUR0022 (SAR_RS00110)  | 0.07                              | 1.12                            | 0.75                                                       | 1.05                           | 0.15                         | 1.12                                                    | 1.05                           | 0.15                         | 1.12                                                    |
| >0021                                 | walI=yycI         | SAUR0023 (SAR_RS00115)  | 0.13                              | 1.27                            | 0.51                                                       | 1.39                           | 0.00                         | 1.01                                                    | 1.39                           | 0.00                         | 1.01                                                    |
| >0022                                 | walJ=yycJ         | SAUR0024 (SAR_RS00120)  | 0.00                              | 0.87                            | 1.12                                                       | 0.87                           | 0.00                         | 1.00                                                    | 0.87                           | 0.00                         | 1.00                                                    |
| >0023                                 | asfH=adsA         | SAUR0025 (SAR_RS00125)  | 0.00                              | 2.29                            | 1.29                                                       | 2.29                           | 0.00                         | 1.90                                                    | 2.33                           | 0.04                         | 1.94                                                    |
| >0024                                 | orfR              | SAUR0026 (SAR_RS00130)  | 0.00                              | 2.42                            | 2.50                                                       | 2.42                           | 1.25                         | 2.08                                                    | 2.71                           | 0.00                         | 2.29                                                    |
| >0031                                 | C1PH96            | (N/A)                   | 0.00                              | >=5.00                          | 0.00                                                       | >=5.00                         | 0.00                         | >=5.00                                                  | >=5.00                         | 0.00                         | >=5.00                                                  |
| >0036                                 | lrcP              | (N/A)                   | 0.00                              | >=5.00                          | 0.00                                                       | >=5.00                         | 0.24                         | >=5.00                                                  | >=5.00                         | 0.24                         | >=5.00                                                  |
| >0037                                 | GOLPRS            | (N/A)                   | 0.00                              | 0.00                            | >=5.00                                                     | 0.00                           | 0.00                         | >=5.00                                                  | 0.00                           | 0.00                         | >=5.00                                                  |
| >0043                                 | hdsR2_CC22/93/425 | (N/A)                   | 0.00                              | 0.00                            | >=5.00                                                     | 0.00                           | 0.00                         | >=5.00                                                  | 0.00                           | 0.00                         | >=5.00                                                  |
| >0055                                 | Q6GD44            | (N/A)                   | 0.00                              | >=5.00                          | 0.00                                                       | >=5.00                         | 0.00                         | >=5.00                                                  | >=5.00                         | 0.00                         | >=5.00                                                  |
| >0056                                 | DUF81-GI          | (N/A)                   | 0.13                              | 0.66                            | 0.26                                                       | >=5.00                         | >=5.00                       | >=5.00                                                  | >=5.00                         | >=5.00                       | >=5.00                                                  |
| >0057                                 | cttB-GI           | (N/A)                   | 0.15                              | 0.84                            | 0.56                                                       | >=5.00                         | >=5.00                       | >=5.00                                                  | >=5.00                         | >=5.00                       | >=5.00                                                  |
| >0058                                 | cttA-GI           | (N/A)                   | 1.31                              | 0.84                            | 0.56                                                       | >=5.00                         | >=5.00                       | >=5.00                                                  | >=5.00                         | >=5.00                       | >=5.00                                                  |
| >0059                                 | cttB-GI           | (N/A)                   | 0.00                              | 0.45                            | 0.37                                                       | >=5.00                         | >=5.00                       | >=5.00                                                  | >=5.00                         | >=5.00                       | >=5.00                                                  |
| >0060                                 | sqm=fcB           | (N/A)                   | 0.00                              | 1.01                            | 0.67                                                       | >=5.00                         | >=5.00                       | >=5.00                                                  | >=5.00                         | >=5.00                       | >=5.00                                                  |
| >0061                                 | dusC              | (N/A)                   | 0.00                              | 1.32                            | 1.32                                                       | 1.42                           | 0.51                         | 1.52                                                    | 1.52                           | 0.61                         | 1.62                                                    |
| >0062                                 | A6TXM6=DUF6007    | (N/A)                   | 0.00                              | >=5.00                          | >=5.00                                                     | >=5.00                         | 0.00                         | >=5.00                                                  | >=5.00                         | 0.00                         | >=5.00                                                  |
| >0063                                 | A6QD71            | (N/A)                   | 0.00                              | >=5.00                          | >=5.00                                                     | >=5.00                         | 0.00                         | 4.62                                                    | >=5.00                         | 0.00                         | 4.62                                                    |
| >0069                                 | QSHU2             | (N/A)                   | 0.00                              | 0.00                            | >=5.00                                                     | 0.00                           | >=5.00                       | 0.00                                                    | >=5.00                         | 0.00                         | >=5.00                                                  |
| >0070                                 | Q6GD34            | (N/A)                   | 0.00                              | 0.00                            | >=5.00                                                     | 0.00                           | 0.00                         | >=5.00                                                  | 0.00                           | 0.00                         | >=5.00                                                  |
| >0071                                 | A6QD75            | (N/A)                   | 0.00                              | 0.00                            | >=5.00                                                     | 0.00                           | 0.00                         | >=5.00                                                  | 0.00                           | 0.00                         | >=5.00                                                  |
| >0076                                 | Q6GKK6            | (N/A)                   | 0.00                              | 4.08                            | >=5.00                                                     | 4.25                           | 0.16                         | >=5.00                                                  | 4.25                           | 0.16                         | >=5.00                                                  |
| >0077                                 | Q7A890            | (N/A)                   | 0.00                              | 4.69                            | 2.89                                                       | 4.66                           | 0.03                         | 3.96                                                    | 4.72                           | 0.10                         | 4.03                                                    |
| >0079                                 | Q2YU72=yyt2       | SAUR2960                | 0.41                              | 2.48                            | 1.86                                                       | 2.48                           | 0.00                         | 2.69                                                    | 2.48                           | 0.00                         | 2.69                                                    |
| >0080                                 | plc               | SAUR2961 (plc)          | 0.00                              | 2.74                            | 3.14                                                       | 2.74                           | 0.00                         | 4.46                                                    | 2.74                           | 0.00                         | 4.46                                                    |
| >0081                                 | Q8MYT6            | SAUR2962                | 0.00                              | 3.04                            | 1.52                                                       | 2.95                           | 0.04                         | 2.95                                                    | 2.98                           | 0.00                         | 1.82                                                    |
| >0082                                 | Q8MYT5            | SAUR2963                | 0.17                              | 1.53                            | 0.76                                                       | 1.69                           | 0.24                         | 1.61                                                    | 1.53                           | 0.17                         | 1.44                                                    |
| >0083                                 | norC              | SAUR2964                | 0.00                              | 3.02                            | 1.37                                                       | 3.10                           | 0.22                         | 3.10                                                    | 3.10                           | 0.22                         | 3.10                                                    |
| >0084                                 | nptA              | SAUR2965                | 0.00                              | 0.90                            | 0.36                                                       | 0.90                           | 0.00                         | 1.14                                                    | 0.90                           | 0.00                         | 1.14                                                    |
| >0085                                 | Q2YU55            | SAUR2966                | 0.00                              | 3.83                            | 0.79                                                       | 3.83                           | 0.00                         | 3.66                                                    | 3.89                           | 0.06                         | 3.72                                                    |
| >0086                                 | DUF1648           | SAUR1006 (SAR_RS00530)  | 0.21                              | 0.84                            | 0.21                                                       | 0.42                           | 0.21                         | 0.42                                                    | 0.42                           | 0.21                         | 0.42                                                    |
| >0087                                 | icfP-locus1       | SAUR1007 (SAR_RS00535)  | 0.13                              | 1.13                            | 1.00                                                       | 1.32                           | 0.06                         | 0.56                                                    | 1.26                           | 0.00                         | 0.50                                                    |
| >0088                                 | spa               | (N/A)                   | 3.53                              | >=5.00                          | >=5.00                                                     | >=5.00                         | >=5.00                       | >=5.00                                                  | >=5.00                         | >=5.00                       | >=5.00                                                  |
| >0089                                 | sarS              | SAUR1009 (SAR_RS00545)  | 0.13                              | 0.53                            | 0.13                                                       | 0.65                           | 0.00                         | 0.66                                                    | 0.66                           | 0.00                         | 0.66                                                    |
| >0090                                 | sirC              | SAUR1010 (SAR_RS00550)  | 0.00                              | 0.40                            | 0.30                                                       | 0.40                           | 0.30                         | 0.20                                                    | 0.20                           | 0.10                         | 0.30                                                    |
| >0091                                 | sirB              | SAUR1011 (SAR_RS00555)  | 0.00                              | 0.90                            | 0.20                                                       | 0.80                           | 0.10                         | 0.80                                                    | 0.80                           | 0.10                         | 0.80                                                    |
| >0092                                 | sirA              | SAUR1012 (SAR_RS00560)  | 0.00                              | 0.20                            | 0.30                                                       | 0.20                           | 0.00                         | 0.30                                                    | 0.20                           | 0.00                         | 0.30                                                    |
| >0093                                 | sbnA=ycyK/L1      | SAUR1013 (SAR_RS00565)  | 0.00                              | 0.41                            | 0.10                                                       | 0.41                           | 0.00                         | 0.31                                                    | 0.41                           | 0.00                         | 0.31                                                    |
| >0094                                 | sbnB              | SAUR1014 (SAR_RS00570)  | 0.00                              | 0.99                            | 0.49                                                       | 0.99                           | 0.00                         | 0.69                                                    | 0.99                           | 0.00                         | 0.69                                                    |
| >0095                                 | sbnC              | SAUR1015 (SAR_RS00575)  | 0.06                              | 1.60                            | 1.08                                                       | 1.65                           | 0.11                         | 1.88                                                    | 1.60                           | 0.06                         | 1.82                                                    |
| >0096                                 | sbnD              | SAUR1016 (SAR_RS00580)  | 0.00                              | 1.35                            | 0.99                                                       | 1.35                           | 0.99                         | 1.35                                                    | 1.35                           | 0.99                         | 1.35                                                    |
| >0097                                 | sbnE              | SAUR1017 (SAR_RS00585)  | 0.06                              | 2.01                            | 1.04                                                       | 1.96                           | 0.00                         | 2.01                                                    | 2.01                           | 0.06                         | 2.07                                                    |
| >0098                                 | sbnF=ucC          | SAUR1018 (SAR_RS00590)  | 0.06                              | 1.67                            | 0.34                                                       | 1.78                           | 0.06                         | 1.72                                                    | 1.78                           | 0.06                         | 1.72                                                    |
| >0099                                 | sbnG              | SAUR1019 (SAR_RS00595)  | 0.00                              | 1.29                            | 0.13                                                       | 1.42                           | 0.13                         | 1.54                                                    | 1.29                           | 0.00                         | 1.42                                                    |
| >0100                                 | sbnH              | SAUR1020 (SAR_RS00600)  | 0.00                              | 1.75                            | 0.75                                                       | 1.75                           | 0.17                         | 2.00                                                    | 1.75                           | 0.17                         | 2.00                                                    |
| >0101                                 | sbnI              | SAUR1021 (SAR_RS00605)  | 0.13                              | 0.13                            | 0.26                                                       | 0.26                           | 0.00                         | 0.13                                                    | 0.26                           | 0.00                         | 0.13                                                    |
| >0102                                 | QSHU3             | (N/A)                   | 0.00                              | >=5.00                          | 0.38                                                       | >=5.00                         | 0.00                         | >=5.00                                                  | >=5.00                         | 0.00                         | >=5.00                                                  |
| >0103                                 | butA              | SAUR1024 (SAR_RS00620)  | 0.00                              | 0.77                            | 0.13                                                       | 0.77                           | 0.00                         | 0.90                                                    | 0.77                           | 0.00                         | 0.90                                                    |
| >0104                                 | QSHIL8=galE       | SAUR1026 (SAR_RS00630)  | 0.00                              | 1.13                            | 0.31                                                       | 1.03                           | 0.10                         | 0.72                                                    | 1.03                           | 0.10                         | 0.72                                                    |
| >0105                                 | wcaJ=tsaA         | SAUR1027 (SAR_RS00635)  | 0.00                              | 4.47                            | 0.14                                                       | 4.62                           | 0.14                         | 4.76                                                    | 4.76                           | 0.29                         | 4.91                                                    |
| >0106                                 | epsF              | SAUR1028 (SAR_RS00640)  | 0.00                              | 0.86                            | 0.34                                                       | 0.77                           | 0.09                         | 1.11                                                    | 0.77                           | 0.09                         | 1.11                                                    |
| >0107                                 | wzy               | SAUR1029 (SAR_RS00645)  | 0.08                              | 2.58                            | 1.41                                                       | 2.42                           | 0.08                         | 1.94                                                    | 2.42                           | 0.08                         | 1.94                                                    |
| >0108                                 | wzx               | SAUR1030 (SAR_RS00650)  | 0.07                              | 1.26                            | 1.75                                                       | 1.33                           | 0.00                         | 2.24                                                    | 1.33                           | 0.00                         | 2.24                                                    |
| >0109                                 | capB-L1           | SAUR1031 (SAR_RS00655)  | 0.17                              | 1.03                            | 0.63                                                       | 1.00                           | >=5.00                       | >=5.00                                                  | >=5.00                         | 0.00                         | >=5.00                                                  |
| >0110                                 | capD              | (N/A)                   | 0.00                              | >=5.00                          | 0.00                                                       | >=5.00                         | 0.00                         | >=5.00                                                  | >=5.00                         | 0.00                         | >=5.00                                                  |
| >0111                                 | QSHJN3            | SAUR1033 (SAR_RS00665)  | 0.00                              | 0.93                            | 0.40                                                       | 0.93                           | 0.00                         | 1.06                                                    | 0.93                           | 0.00                         | 1.06                                                    |
| >0112                                 | deoD-L1           | SAUR1035 (SAR_RS00675)  | 0.00                              | 0.71                            | 0.28                                                       | 0.71                           | 0.00                         | 0.99                                                    | 0.71                           | 0.00                         | 0.99                                                    |
| >0113                                 | tet(38)=morB2     | SAUR1036 (SAR_RS00680)  | 0.07                              | 1.63                            | 0.52                                                       | 1.48                           | 0.07                         | 1.48                                                    | 1.63                           | 0.22                         | 1.55                                                    |
| >0114                                 | deoC-L1           | SAUR1039 (SAR_RS00690)  | 0.30                              | 1.21                            | 0.75                                                       | 1.06                           | 0.15                         | 1.21                                                    | 1.06                           | 0.15                         | 1.21                                                    |
| >0115                                 | deoB              | SAUR1038 (SAR_RS00690)  | 0.08                              | 0.59                            | 0.51                                                       | 0.51                           | 0.00                         | 0.76                                                    | 0.51                           | 0.00                         | 0.76                                                    |
| >0116                                 | phnE2             | SAUR1039 (SAR_RS00695)  | 0.00                              | 1.47                            | 0.61                                                       | 1.59                           | 0.12                         | 1.72                                                    | 1.59                           | 0.12                         | 1.72                                                    |
| >0117                                 | phnE1             | SAUR1040 (SAR_RS00700)  | 0.00                              | 1.75                            | 1.00                                                       | 1.59                           | 0.62                         | 1.37                                                    | 1.59                           | 0.62                         | 1.37                                                    |
| >0118                                 | phnC              | SAUR1041 (SAR_RS00705)  | 0.26                              | 1.94                            | 1.03                                                       | 1.68                           | 0.00                         | 2.45                                                    | 1.68                           | 0.00                         | 2.45                                                    |
| >0119                                 | phnB              | SAUR1042 (SAR_RS00710)  | 0.00                              | 1.15                            | 0.42                                                       | 1.15                           | 0.00                         | 1.36                                                    | 1.15                           | 0.00                         | 1.36                                                    |
| >0120                                 | QSHJM4            | SAUR1043 (SAR_RS00715)  | 0.00                              | 1.17                            | 0.06                                                       | 1.10                           | 0.06                         | 1.17                                                    | 1.17                           | 0.13                         | 1.23                                                    |
| >0121                                 | cpdB              | SAUR1044 (SAR_RS00720)  | 0.13                              | 1.43                            | 0.00                                                       | 1.50                           | 0.20                         | 1.37                                                    | 1.50                           | 0.20                         | 1.37                                                    |
| >0122                                 | Q1Y489            | (N/A)                   | 0.09                              | >=5.00                          | 0.77                                                       | >=5.00                         | 0.00                         | >=5.00                                                  | >=5.00                         | 0.00                         | >=5.00                                                  |
| >0123                                 | wdhE              | SAUR1047 (SAR_RS00735)  | 0.00                              | 0.80                            | 0.80                                                       | 0.77                           | 0.08                         | 0.65                                                    | 0.61                           | 0.23                         | 0.80                                                    |
| >0124                                 | capL-L1           | SAUR1048 (SAR_RS00740)  | 0.00                              | 0.45                            | 0.00                                                       | 0.45                           | 0.00                         | 0.45                                                    | 0.00                           | 0.00                         | 0.15                                                    |
| >0125                                 | capB-L1           | SAUR1049 (SAR_RS00745)  | 0.00                              | 3.06                            | 0.00                                                       | 3.20                           | 0.15                         | 3.20                                                    | 0.00                           | 3.06                         | 0.00                                                    |
| >0126                                 | capC-L1           | SAUR1050 (SAR_RS00750)  | 0.00                              | 0.52                            | 0.00                                                       | 0.39                           | 0.13                         | 0.39                                                    | 0.13                           | 0.65                         | 0.13                                                    |
| >0127                                 | capD              | SAUR1051 (SAR_RS00755)  | 0.05                              | 1.77                            | 0.49                                                       | 0.77                           | 0.16                         | 1.10                                                    | 0.05                           | 0.77                         | 0.49                                                    |
| >0128                                 | capE              | SAUR1052 (SAR_RS00760)  | 0.00                              | 0.97                            | 0.29                                                       | 0.97                           | 0.00                         | 0.68                                                    | 0.00                           | 0.97                         | 0.29                                                    |
| >0129                                 | capF              | SAUR1053 (SAR_RS00765)  | 0.00                              | 1.80                            | 0.99                                                       | 1.80                           | 0.00                         | 1.71                                                    | 0.00                           | 1.80                         | 0.99                                                    |
| >0130                                 | capG              | SAUR1054 (SAR_RS00770)  | 0.00                              | 1.07                            | 0.44                                                       | 1.07                           | 0.18                         | 0.80                                                    | 0.98                           | 0.27                         | 0.71                                                    |
| >0131                                 | capH              | (N/A)                   | 0.00                              | >=5.00                          | 0.74                                                       | >=5.00                         | 0.00                         | >=5.00                                                  | >=5.00                         | 0.00                         | >=5.00                                                  |
| >0132                                 | capI              | (N/A)                   | 0.00                              | >=5.00                          | 0.64                                                       | >=5.00                         | 0.00                         | >=5.00                                                  | >=5.00                         | 0.00                         | >=5.00                                                  |
| >0133                                 | capJ              | (N/A)                   | 0.00                              | >=5.00                          | 0.00                                                       | >=5.00                         | 0.00                         | >=5.00                                                  | >=5.00                         | 0.26                         | >=5.00                                                  |
| >0134                                 | capK              | (N/A)                   | 0.00                              |                                 |                                                            |                                |                              |                                                         |                                |                              |                                                         |

| Number/<br>Position in the<br>figures | Gene ID        | ID in PubMLST cg scheme | ED133 vs. swan<br>isolate 15V8707 | X22 vs. swan isolate<br>15V8707 | CC522 goat isolate<br>17CS1042 vs. swan<br>isolate 15V8707 | ED133 vs. duck<br>isolate V315 | X22 vs. duck isolate<br>V315 | CC522 goat isolate<br>17CS1042 vs. duck<br>isolate V315 | ED133 vs. duck<br>isolate V482 | X22 vs. duck isolate<br>V482 | CC522 goat isolate<br>17CS1042 vs. duck<br>isolate V482 |
|---------------------------------------|----------------|-------------------------|-----------------------------------|---------------------------------|------------------------------------------------------------|--------------------------------|------------------------------|---------------------------------------------------------|--------------------------------|------------------------------|---------------------------------------------------------|
| >0185                                 | hptA           | SAUR0213 (SAR_RS01065)  | 0.10                              | 1.65                            | 1.24                                                       | 1.86                           | 0.31                         | 1.55                                                    | 1.65                           | 0.10                         | 1.34                                                    |
| >0186                                 | pfllB          | SAUR0214 (SAR_RS01070)  | 0.00                              | 0.49                            | 0.44                                                       | 0.53                           | 0.04                         | 0.40                                                    | 0.53                           | 0.04                         | 0.40                                                    |
| >0187                                 | pfllA          | SAUR0215 (SAR_RS01075)  | 0.00                              | 0.00                            | 0.26                                                       | 0.00                           | 0.00                         | 0.26                                                    | 0.00                           | 0.00                         | 0.26                                                    |
| >0188                                 | Q2YV51         | SAUR0216 (SAR_RS01080)  | 0.00                              | >5.00                           | 0.00                                                       | >5.00                          | 0.00                         | >5.00                                                   | >5.00                          | >5.00                        | >5.00                                                   |
| >0189                                 | glpQ1          | SAUR0217 (SAR_RS01085)  | 0.00                              | 0.91                            | 0.68                                                       | 0.85                           | 0.06                         | 1.08                                                    | 0.85                           | 0.06                         | 1.08                                                    |
| >0190                                 | Q2YV49         | SAUR0218 (SAR_RS01090)  | 0.00                              | 1.16                            | 1.16                                                       | 1.16                           | 0.00                         | 1.74                                                    | 1.16                           | 0.00                         | 1.74                                                    |
| >0191                                 | coa            | (N/A)                   | 3.87                              | >5.00                           | >5.00                                                      | >5.00                          | 0.19                         | >5.00                                                   | >5.00                          | >5.00                        | >5.00                                                   |
| >0192                                 | fadA           | SAUR0222 (SAR_RS01110)  | 0.00                              | 0.84                            | 1.01                                                       | 0.84                           | 0.00                         | 1.27                                                    | 0.84                           | 0.00                         | 1.27                                                    |
| >0193                                 | fadB           | SAUR0223 (SAR_RS01115)  | 0.00                              | 1.02                            | 1.06                                                       | 1.02                           | 0.00                         | 0.93                                                    | 1.02                           | 0.00                         | 0.93                                                    |
| >0194                                 | fadD           | SAUR0224 (SAR_RS01120)  | 0.08                              | 1.40                            | 0.66                                                       | 1.40                           | 0.08                         | 0.99                                                    | 1.40                           | 0.08                         | 0.99                                                    |
| >0195                                 | fadE           | SAUR0225 (SAR_RS01125)  | 0.00                              | >5.00                           | >5.00                                                      | >5.00                          | 0.00                         | >5.00                                                   | >5.00                          | 0.00                         | >5.00                                                   |
| >0196                                 | fadX           | SAUR0226 (SAR_RS01130)  | 1.01                              | 0.95                            | 0.63                                                       | 1.08                           | 1.96                         | 1.96                                                    | 1.96                           | 0.00                         | 1.08                                                    |
| >0197                                 | prfW=prfS      | (N/A)                   | 0.09                              | >5.00                           | 0.79                                                       | >5.00                          | 0.00                         | >5.00                                                   | >5.00                          | 0.00                         | >5.00                                                   |
| >0198                                 | nikA           | SAUR0229 (SAR_RS01145)  | 0.07                              | 1.42                            | 0.61                                                       | 1.56                           | 0.27                         | 1.42                                                    | 1.42                           | 0.14                         | 1.29                                                    |
| >0199                                 | DUF0488        | SAUR0230 (SAR_RS01150)  | 0.00                              | 1.40                            | 1.96                                                       | 1.40                           | 0.00                         | 1.68                                                    | 1.40                           | 0.00                         | 1.68                                                    |
| >0200                                 | QSHJ09         | SAUR0231 (SAR_RS01155)  | 0.00                              | >5.00                           | >5.00                                                      | >5.00                          | 0.00                         | 2.30                                                    | >5.00                          | 0.00                         | 2.30                                                    |
| >0201                                 | hmp            | SAUR0232 (SAR_RS01160)  | 0.00                              | 2.62                            | 0.17                                                       | 2.53                           | 0.09                         | 2.71                                                    | 2.53                           | 0.09                         | 2.71                                                    |
| >0202                                 | hct            | SAUR0234 (SAR_RS01170)  | 0.10                              | 0.24                            | 0.10                                                       | 0.31                           | 0.00                         | 0.31                                                    | 0.31                           | 0.00                         | 0.31                                                    |
| >0203                                 | ptsI=ptsIPIBC  | SAUR0236 (SAR_RS01180)  | 0.07                              | 0.65                            | 0.26                                                       | 0.98                           | 0.07                         | 0.98                                                    | 0.78                           | 0.07                         | 0.98                                                    |
| >0204                                 | rhlA           | SAUR0237 (SAR_RS01185)  | 0.11                              | 1.39                            | 0.53                                                       | 1.28                           | 0.00                         | 0.96                                                    | 1.28                           | 0.00                         | 0.96                                                    |
| >0205                                 | bgIG=licR      | SAUR2967                | 0.00                              | 0.95                            | 0.86                                                       | 0.95                           | 0.10                         | 0.86                                                    | 0.91                           | 0.05                         | 0.81                                                    |
| >0206                                 | QSHJ02         | (N/A)                   | 0.00                              | 0.64                            | 1.07                                                       | 0.64                           | 0.00                         | 0.43                                                    | 0.64                           | 0.00                         | 0.43                                                    |
| >0207                                 | QSHJ01=gatB1   | SAUR2968                | 0.00                              | 0.72                            | 0.00                                                       | 0.72                           | 0.00                         | 0.72                                                    | 0.72                           | 0.36                         | 0.72                                                    |
| >0208                                 | Q2GZC=gatC1    | SAUR2969                | 0.00                              | 0.71                            | 0.40                                                       | 0.79                           | 0.08                         | 1.03                                                    | 0.71                           | 0.00                         | 0.95                                                    |
| >0209                                 | gutB           | SAUR2970 (gutB)         | 0.00                              | 1.33                            | 0.47                                                       | 1.33                           | 0.00                         | 1.33                                                    | 1.33                           | 0.00                         | 1.33                                                    |
| >0210                                 | QSHJ07         | SAUR2971                | 0.00                              | 2.04                            | 1.36                                                       | 2.04                           | 0.00                         | 0.68                                                    | 2.04                           | 0.00                         | 0.68                                                    |
| >0211                                 | QSHJ06         | SAUR2972                | 0.00                              | 1.05                            | 1.63                                                       | 0.86                           | 0.19                         | 1.92                                                    | 0.86                           | 0.19                         | 1.52                                                    |
| >0212                                 | tarI1=ispD1    | (N/A)                   | 0.00                              | 0.84                            | 2.79                                                       | 0.00                           | 0.84                         | 2.79                                                    | 0.00                           | 0.84                         | 2.79                                                    |
| >0213                                 | tarJ1          | SAUR2973                | 0.00                              | 0.78                            | 2.14                                                       | 0.00                           | 0.78                         | 2.14                                                    | 0.00                           | 0.78                         | 2.14                                                    |
| >0214                                 | tarL1          | SAUR2974                | 0.06                              | 2.30                            | 1.24                                                       | 0.06                           | 2.30                         | 1.24                                                    | 0.06                           | 2.30                         | 1.24                                                    |
| >0215                                 | tarF           | SAUR2975                | 0.17                              | 1.62                            | 0.26                                                       | 0.00                           | 1.45                         | 0.09                                                    | 0.00                           | 1.45                         | 0.09                                                    |
| >0216                                 | tarJ2=gutB     | SAUR2976                | 0.00                              | 0.24                            | 0.00                                                       | 0.68                           | 0.00                         | 0.00                                                    | 0.00                           | 0.00                         | 0.00                                                    |
| >0217                                 | tarL1=tafB/F   | SAUR2977                | 0.00                              | 0.41                            | 0.06                                                       | 0.07                           | 0.12                         | 0.06                                                    | 0.12                           | 0.06                         | 0.12                                                    |
| >0218                                 | tarS           | SAUR2940                | >5.00                             | 1.16                            | 0.17                                                       | >5.00                          | 1.22                         | 0.23                                                    | >5.00                          | 1.16                         | 0.17                                                    |
| >0219                                 | lytS           | SAUR0256 (SAR_RS01280)  | 0.00                              | 0.40                            | >5.00                                                      | 0.00                           | 0.40                         | >5.00                                                   | 0.00                           | 0.40                         | >5.00                                                   |
| >0220                                 | lytR           | SAUR0257 (SAR_RS01285)  | 0.00                              | 0.94                            | 0.00                                                       | 0.00                           | 0.94                         | 0.00                                                    | 0.00                           | 0.94                         | 0.00                                                    |
| >0221                                 | lrgA           | SAUR0258 (SAR_RS01290)  | 0.00                              | 0.00                            | 0.00                                                       | 0.00                           | 0.00                         | 0.00                                                    | 0.00                           | 0.00                         | 0.00                                                    |
| >0222                                 | lrgA           | SAUR0259 (SAR_RS01295)  | 0.00                              | 0.57                            | 0.14                                                       | 0.14                           | 0.57                         | 0.14                                                    | 0.00                           | 0.57                         | 0.14                                                    |
| >0223                                 | QSHJ02         | SAUR0261 (SAR_RS01305)  | 0.00                              | 1.14                            | 0.14                                                       | 0.00                           | 1.13                         | 0.14                                                    | 0.13                           | 0.14                         | 0.14                                                    |
| >0224                                 | Q1YAD5=ptsG3   | SAUR0262 (SAR_RS01310)  | 0.13                              | >5.00                           | 2.02                                                       | 0.13                           | 0.57                         | 2.02                                                    | 0.13                           | >5.00                        | 2.02                                                    |
| >0225                                 | bgIA           | SAUR0263 (SAR_RS01315)  | 0.07                              | 1.60                            | 0.97                                                       | 0.00                           | 1.53                         | 0.90                                                    | 0.00                           | 1.53                         | 0.90                                                    |
| >0226                                 | rbxK           | SAUR0267 (SAR_RS01335)  | 0.00                              | 1.09                            | 0.66                                                       | 0.00                           | 1.09                         | 0.66                                                    | 0.00                           | 1.09                         | 0.66                                                    |
| >0227                                 | rbxJ           | SAUR0268 (SAR_RS01340)  | 0.00                              | 1.73                            | 1.48                                                       | 0.00                           | 1.73                         | 1.48                                                    | 0.00                           | 1.73                         | 1.48                                                    |
| >0228                                 | rbxU           | SAUR0269 (SAR_RS01345)  | 0.00                              | 2.61                            | 1.47                                                       | 0.00                           | 2.61                         | 1.47                                                    | 0.00                           | 2.61                         | 1.47                                                    |
| >0229                                 | rbxH=degA      | SAUR0270 (SAR_RS01350)  | 0.00                              | 2.00                            | 1.50                                                       | 0.00                           | 2.00                         | 1.50                                                    | 0.00                           | 2.00                         | 1.50                                                    |
| >0230                                 | yyxJ           | SAUR0273 (SAR_RS01365)  | 0.00                              | 1.43                            | 0.80                                                       | >5.00                          | 0.80                         | >5.00                                                   | 0.00                           | 0.80                         | 0.80                                                    |
| >0231                                 | yyeI           | SAUR0274 (SAR_RS01370)  | 0.00                              | 0.81                            | 0.50                                                       | 0.00                           | 0.81                         | 0.50                                                    | 0.00                           | 0.81                         | 0.50                                                    |
| >0232                                 | lytM           | SAUR0275 (SAR_RS01375)  | 0.00                              | 1.47                            | 0.21                                                       | 0.00                           | 1.47                         | 0.21                                                    | 0.00                           | 1.47                         | 0.21                                                    |
| >0233                                 | QSHJ98=ybhF    | SAUR0276 (SAR_RS01380)  | 0.00                              | 0.91                            | 0.15                                                       | 0.00                           | 0.91                         | 0.15                                                    | 0.00                           | 0.91                         | 0.15                                                    |
| >0234                                 | QSHJ97         | SAUR0277 (SAR_RS01385)  | 0.11                              | 0.76                            | >5.00                                                      | 0.00                           | 0.65                         | >5.00                                                   | 0.11                           | 0.76                         | >5.00                                                   |
| >0235                                 | QSHJ96         | SAUR0278 (SAR_RS01390)  | 0.00                              | 1.11                            | 1.03                                                       | 0.00                           | 1.11                         | 1.03                                                    | 0.00                           | 1.11                         | 1.03                                                    |
| >0236                                 | QSHJ95         | SAUR0279 (SAR_RS01395)  | 0.13                              | 0.66                            | 0.66                                                       | 0.20                           | 0.72                         | 0.72                                                    | 0.26                           | 0.79                         | 0.79                                                    |
| >0237                                 | esaA           | SAUR0280 (SAR_RS01400)  | 0.00                              | 1.00                            | 0.78                                                       | 0.00                           | 1.00                         | 0.78                                                    | 0.00                           | 1.00                         | 0.78                                                    |
| >0238                                 | esaA           | SAUR0281 (SAR_RS01405)  | 0.00                              | 0.34                            | 0.00                                                       | 0.34                           | 0.00                         | 0.00                                                    | 0.34                           | 0.00                         | 0.00                                                    |
| >0239                                 | esaA           | SAUR0282 (SAR_RS01410)  | 0.03                              | 1.06                            | 0.86                                                       | 0.03                           | 1.06                         | 0.86                                                    | 0.03                           | 1.06                         | 0.86                                                    |
| >0240                                 | esaA           | SAUR2978                | 0.00                              | 0.44                            | 0.00                                                       | 0.00                           | 0.44                         | 0.00                                                    | 0.00                           | 0.44                         | 0.00                                                    |
| >0241                                 | esaB           | SAUR0284 (SAR_RS01420)  | 0.00                              | 1.23                            | 0.00                                                       | 0.00                           | 1.23                         | 0.00                                                    | 0.00                           | 1.23                         | 0.00                                                    |
| >0242                                 | esaB           | SAUR0285 (SAR_RS01425)  | 0.00                              | 0.67                            | 0.60                                                       | 0.07                           | 0.75                         | 0.67                                                    | 0.00                           | 0.67                         | 0.60                                                    |
| >0243                                 | essC           | SAUR0286 (SAR_RS01430)  | 0.05                              | 0.92                            | 0.79                                                       | 0.00                           | 0.88                         | 0.79                                                    | 0.00                           | 0.88                         | 0.79                                                    |
| >0244                                 | evxH           | (N/A)                   | 0.00                              | 0.63                            | 0.63                                                       | 0.00                           | 0.63                         | 0.63                                                    | 0.00                           | 0.63                         | 0.63                                                    |
| >0245                                 | Q1YAD5=DUF4467 | SAUR2979                | >5.00                             | >5.00                           | >5.00                                                      | 1.47                           | 1.47                         | >5.00                                                   | >5.00                          | >5.00                        | >5.00                                                   |
| >0246                                 | Q2G173=DUF4064 | (N/A)                   | 0.00                              | 1.25                            | 0.50                                                       | 0.00                           | 1.25                         | 0.50                                                    | 0.00                           | 1.25                         | 0.50                                                    |
| >0247                                 | focA-L1=mirC   | SAUR0301 (SAR_RS01505)  | 0.00                              | 1.82                            | 2.18                                                       | 0.12                           | 1.94                         | 2.30                                                    | 0.00                           | 1.82                         | 2.18                                                    |
| >0248                                 | brnQ2          | SAUR0302 (SAR_RS01510)  | 0.08                              | >5.00                           | 1.30                                                       | 0.23                           | >5.00                        | 1.45                                                    | 0.23                           | >5.00                        | 1.45                                                    |
| >0249                                 | Q99W50=sapS    | SAUR0303 (SAR_RS01515)  | 0.00                              | 0.90                            | 0.34                                                       | 0.00                           | 0.90                         | 0.34                                                    | 0.00                           | 0.90                         | 0.34                                                    |
| >0250                                 | Q2G168         | SAUR0305 (SAR_RS01525)  | 1.33                              | 1.90                            | 2.10                                                       | 0.00                           | 0.57                         | 0.76                                                    | 0.00                           | 0.57                         | 0.76                                                    |
| >0251                                 | ASIP06         | SAUR0306 (SAR_RS01530)  | 0.00                              | 1.03                            | 1.03                                                       | 0.00                           | 1.03                         | 1.03                                                    | 0.00                           | 1.03                         | 1.03                                                    |
| >0252                                 | pfvR           | SAUR0307 (SAR_RS01535)  | 0.00                              | 1.45                            | 1.45                                                       | 0.00                           | 1.45                         | 1.45                                                    | 0.00                           | 1.45                         | 1.45                                                    |
| >0253                                 | QSHJ57         | SAUR0308 (SAR_RS01540)  | 0.09                              | 0.27                            | >5.00                                                      | 0.00                           | 0.18                         | >5.00                                                   | 0.00                           | 0.18                         | >5.00                                                   |
| >0254                                 | psuG           | SAUR0309 (SAR_RS01545)  | 0.00                              | 1.84                            | >5.00                                                      | 0.00                           | 1.84                         | >5.00                                                   | 0.00                           | 1.84                         | >5.00                                                   |
| >0255                                 | nupC2          | SAUR0310 (SAR_RS01550)  | 0.00                              | 1.15                            | >5.00                                                      | 0.00                           | 1.15                         | >5.00                                                   | 0.00                           | 1.15                         | >5.00                                                   |
| >0256                                 | nanT           | SAUR0311 (SAR_RS01555)  | 0.00                              | 3.39                            | 1.50                                                       | 0.07                           | 3.46                         | 1.57                                                    | 0.00                           | 3.39                         | 1.50                                                    |
| >0257                                 | nanA           | SAUR0312 (SAR_RS01560)  | 0.00                              | 1.51                            | 0.12                                                       | 0.11                           | 1.59                         | 1.13                                                    | 0.11                           | 1.59                         | 1.13                                                    |
| >0258                                 | nanK           | SAUR0313 (SAR_RS01565)  | 0.00                              | 1.47                            | 0.35                                                       | 0.00                           | 1.51                         | 0.35                                                    | 0.00                           | 1.51                         | 0.35                                                    |
| >0259                                 | nanH           | SAUR0314 (SAR_RS01570)  | 0.00                              | 0.87                            | 0.50                                                       | 0.07                           | 0.87                         | 0.50                                                    | 0.07                           | 0.87                         | 0.50                                                    |
| >0260                                 | nanE           | SAUR0315 (SAR_RS01575)  | 0.00                              | 1.05                            | 0.60                                                       | 0.00                           | 1.05                         | 0.60                                                    | 0.15                           | 1.20                         | 0.75                                                    |
| >0261                                 | QSHJ49         | SAUR0316 (SAR_RS01580)  | 0.08                              | 0.53                            | 0.99                                                       | 0.08                           | 0.53                         | 0.99                                                    | 0.08                           | 0.53                         | 0.99                                                    |
| >0262                                 | lip2           | SAUR0317 (SAR_RS01585)  | >5.00                             | >5.00                           | >5.00                                                      | >5.00                          | >5.00                        | 0.00                                                    | >5.00                          | >5.00                        | 0.00                                                    |
| >0263                                 | ASIPQ2         | SAUR0318 (SAR_RS01590)  | 0.00                              | 1.81                            | >5.00                                                      | 0.00                           | 1.81                         | >5.00                                                   | 0.00                           | 1.81                         | >5.00                                                   |
| >0264                                 | Q6G1Z4=namA    | SAUR0319 (SAR_RS01595)  | 0.08                              | 1.58                            | >5.00                                                      | 0.08                           | 1.58                         | >5.00                                                   | 0.08                           | 1.58                         | >5.00                                                   |
| >0265                                 | limiA          | SAUR0321 (SAR_RS01605)  | 0.10                              | 2.20                            | 1.10                                                       | 0.10                           | 2.20                         | 2.09                                                    | 0.10                           | 2.20                         | 2.09                                                    |
| >0266                                 | gcvH1          | SAUR0322 (SAR_RS01610)  | 0.00                              | 0.60                            | 1.20                                                       | 0.00                           | 0.60                         | 1.20                                                    | 0.00                           | 0.60                         | 1.20                                                    |
| >0267                                 | UPF0189=yndB   | SAUR0323 (SAR_RS01615)  | 0.12                              | 1.50                            | 1.75                                                       | 0.12                           | 1.50                         | 1.75                                                    | 0.12                           | 1.50                         | 1.75                                                    |
| >0268                                 | str2           | SAUR0324 (SAR_RS01620)  | 0.11                              | 2.65                            | 0.21                                                       | 0.11                           | 2.75                         | 1.06                                                    | 0.11                           | 2.65                         | 0.95                                                    |
| >0269                                 | lplA1          | SAUR0325 (SAR_RS01625)  | 0.00                              | 3.03                            | 1.27                                                       | 0.00                           | 3.03                         | 1.27                                                    | 0.00                           | 3.03                         | 1.27                                                    |
| >0270                                 | ulaA           | SAUR0327 (SAR_RS01635)  | 0.22                              | 1.56                            | 0.89                                                       | 0.22                           | 1.56                         | 0.89                                                    | 0.15                           | 1.48                         | 0.82                                                    |
| >0271                                 | QSHW4          | SAUR0328 (SAR_RS01640)  | 0.00                              | 0.35                            | 0.00                                                       | 0.00                           | 0.35                         | 0.00                                                    | 0.00                           | 0.35                         | 0.00                                                    |
| >0272                                 | QSHW3          | SAUR0329 (SAR_RS01645)  | 0.00                              | 1.35                            | 0.90                                                       | 0.23                           | 1.38                         | 1.13                                                    | 0.23                           | 1.38                         | 1.13                                                    |
| >0273                                 | ASY277=licR2   | SAUR0330 (SAR_RS01650)  | 0.00                              | 2.20                            | 1.18                                                       | 0.20                           | 2.15                         | 1.12                                                    | 0.20                           | 2.15                         | 1.12                                                    |
| >0274                                 | mepR           | SAUR0331 (SAR_RS01655)  | 0.00                              | 1.43                            | 0.48                                                       | 0.00                           | 1.43                         | 0.48                                                    | 0.00                           | 1.43                         | 0.48                                                    |
| >0275                                 | mepA           | SAUR0332 (SAR_RS01660)  | 0.00                              | 1.77                            | 0.81                                                       | 0.00                           | 1.77                         | 0.81                                                    | 0.00                           | 1.77                         | 0.81                                                    |
| >0276                                 | mepB           | (N/A)                   | 0.00                              | 2.24                            | 1.79                                                       | 0.00                           | 2.24                         | 1.79                                                    | 2.69                           | 3.14                         | 2.69                                                    |
| >0277                                 | glpT           | SAUR0334 (SAR_RS01670)  | 0.00                              | 0.52                            | 0.37                                                       | 0.07                           | 0.59                         | 0.44                                                    | 0.07                           | 0.59                         | 0.44                                                    |
| >0278                                 | mhgA-1         | SAUR0335 (SAR_RS01675)  | 0.00                              | 1.73                            | >5.00                                                      | 0.00                           | 1.73                         | >5.00                                                   | >5.00                          | >5.00                        | 0.54                                                    |
| >0279                                 | ssuB=linA      | SAUR0336 (SAR_RS01680)  | 0.00                              | 2.07                            | 1.22                                                       | 0.00                           | 2.07                         | 1.22                                                    | 0.00                           | 2.07                         | 1.22                                                    |
| >0280                                 | ssuE           | SAUR0337 (SAR_RS01685)  | 0.00                              | 2.12                            | 1.06                                                       | 0.00                           | 2.12                         | 1.06                                                    | 0.00                           | 2.12                         | 1.06                                                    |
| >0281                                 | yeiH           | SAUR0338 (SAR_RS01690)  | 0.00                              | 1.31                            | 0.50                                                       | 0.00                           | 1.31                         | 0.50                                                    | 0.00                           | 1.31                         | 0.50                                                    |
| >0282                                 | rimL=lydA      | SAUR0340                |                                   |                                 |                                                            |                                |                              |                                                         |                                |                              |                                                         |

| Number/<br>Position in the<br>figures | Gene ID        | ID in PubMLST cg scheme | ED133 vs. swan<br>isolate 15V8707 | X22 vs. swan isolate<br>15V8707 | CC522 goat isolate<br>17CS1042 vs. swan<br>isolate 15V8707 | ED133 vs. duck<br>isolate V315 | X22 vs. duck isolate<br>V315 | CC522 goat isolate<br>17CS1042 vs. duck<br>isolate V315 | ED133 vs. duck<br>isolate V482 | X22 vs. duck isolate<br>V482 | CC522 goat isolate<br>17CS1042 vs. duck<br>isolate V482 |
|---------------------------------------|----------------|-------------------------|-----------------------------------|---------------------------------|------------------------------------------------------------|--------------------------------|------------------------------|---------------------------------------------------------|--------------------------------|------------------------------|---------------------------------------------------------|
| >0333                                 | ssl03=set8     | (N/A)                   | 0.00                              | >=5.00                          | >=5.00                                                     | >=5.00                         | >=5.00                       | 0.00                                                    | 0.00                           | >=5.00                       | >=5.00                                                  |
| >0334                                 | ssl04=set9     | (N/A)                   | 0.00                              | >=5.00                          | >=5.00                                                     | 0.28                           | >=5.00                       | >=5.00                                                  | 0.00                           | >=5.00                       | >=5.00                                                  |
| >0335                                 | ssl05=set3     | (N/A)                   | 0.00                              | >=5.00                          | >=5.00                                                     | >=5.00                         | >=5.00                       | >=5.00                                                  | 0.00                           | >=5.00                       | >=5.00                                                  |
| >0336                                 | ssl06=set21    | (N/A)                   | 0.00                              | >=5.00                          | >=5.00                                                     | 0.00                           | >=5.00                       | >=5.00                                                  | 0.00                           | >=5.00                       | >=5.00                                                  |
| >0337                                 | ssl07=set1     | SAUR0426 (SAR_RS02130)  | 0.14                              | >=5.00                          | >=5.00                                                     | 0.14                           | >=5.00                       | >=5.00                                                  | 0.14                           | >=5.00                       | >=5.00                                                  |
| >0338                                 | ssl08=set12    | (N/A)                   | 0.14                              | 1.86                            | >=5.00                                                     | 0.00                           | 1.72                         | >=5.00                                                  | 0.14                           | 1.86                         | >=5.00                                                  |
| >0339                                 | ssl09=set5     | SAUR0428 (SAR_RS02140)  | 0.00                              | >=5.00                          | >=5.00                                                     | 0.00                           | >=5.00                       | >=5.00                                                  | 0.00                           | >=5.00                       | >=5.00                                                  |
| >0340                                 | ssl10=set4     | SAUR0428 (SAR_RS02140)  | 0.00                              | >=5.00                          | >=5.00                                                     | 0.00                           | >=5.00                       | >=5.00                                                  | 0.00                           | >=5.00                       | >=5.00                                                  |
| >0341                                 | hsdM-ssl       | (N/A)                   | 0.06                              | 4.11                            | 3.73                                                       | 0.26                           | 4.17                         | 3.92                                                    | 0.09                           | 4.30                         | 4.05                                                    |
| >0342                                 | hsdS-ssl       | (N/A)                   | 0.00                              | >=5.00                          | >=5.00                                                     | 0.08                           | >=5.00                       | >=5.00                                                  | 0.00                           | >=5.00                       | >=5.00                                                  |
| >0343                                 | ssl11=set2     | (N/A)                   | 0.00                              | >=5.00                          | >=5.00                                                     | 0.11                           | >=5.00                       | >=5.00                                                  | 0.00                           | >=5.00                       | >=5.00                                                  |
| >0344                                 | QSHIM7         | SAUR0445 (SAR_RS02225)  | 0.00                              | >=5.00                          | >=5.00                                                     | 0.00                           | >=5.00                       | >=5.00                                                  | 0.00                           | >=5.00                       | >=5.00                                                  |
| >0345                                 | cobW1          | SAUR0446 (SAR_RS02230)  | 0.08                              | 3.66                            | 0.42                                                       | 0.00                           | 3.57                         | 0.33                                                    | 0.00                           | 3.57                         | 0.33                                                    |
| >0346                                 | psmA4          | (N/A)                   | 0.00                              | 0.00                            | 0.00                                                       | 0.00                           | 0.00                         | 0.00                                                    | 0.00                           | 0.00                         | 0.00                                                    |
| >0347                                 | psmA3          | (N/A)                   | 0.00                              | 0.00                            | 0.00                                                       | 0.00                           | 0.00                         | 0.00                                                    | 0.00                           | 0.00                         | 0.00                                                    |
| >0348                                 | psmA2          | (N/A)                   | 0.00                              | 0.00                            | 0.00                                                       | 0.00                           | 0.00                         | 0.00                                                    | 0.00                           | 0.00                         | 0.00                                                    |
| >0349                                 | psmA1          | (N/A)                   | 0.00                              | 0.00                            | 0.00                                                       | 0.00                           | 0.00                         | 0.00                                                    | 0.00                           | 0.00                         | 0.00                                                    |
| >0350                                 | mpsA-muel      | SAUR0448 (SAR_RS02240)  | 0.00                              | 2.83                            | 1.21                                                       | 0.00                           | 2.83                         | 1.21                                                    | 0.00                           | 2.83                         | 1.21                                                    |
| >0351                                 | mpsB-mycC      | SAUR0449 (SAR_RS02245)  | 0.04                              | 2.44                            | 2.18                                                       | 0.04                           | 2.44                         | 2.18                                                    | 0.04                           | 2.44                         | 2.18                                                    |
| >0352                                 | mpsC-mycC      | SAUR0450 (SAR_RS02250)  | 0.00                              | 1.65                            | 0.00                                                       | 0.00                           | 1.65                         | 0.00                                                    | 0.00                           | 1.65                         | 0.00                                                    |
| >0353                                 | QSHIM2         | (N/A)                   | 0.00                              | 2.01                            | 0.86                                                       | 0.00                           | 2.01                         | 0.86                                                    | 0.00                           | 2.01                         | 0.86                                                    |
| >0355                                 | QSHIM1         | SAUR0452 (SAR_RS02260)  | 0.15                              | 1.63                            | >=5.00                                                     | 0.15                           | 1.63                         | >=5.00                                                  | 0.15                           | 1.63                         | >=5.00                                                  |
| >0356                                 | QSHIM0=est1    | SAUR0453 (SAR_RS02265)  | 0.14                              | 1.50                            | 0.00                                                       | 0.14                           | 1.50                         | 0.00                                                    | 0.14                           | 1.50                         | 0.00                                                    |
| >0357                                 | QSHILB-galE    | SAUR0126 (SAR_RS00630)  | 0.07                              | 1.42                            | 0.52                                                       | 0.00                           | 1.35                         | 0.45                                                    | 0.00                           | 1.35                         | 0.45                                                    |
| >0358                                 | mccA-war306    | SAUR0456 (SAR_RS02280)  | 0.11                              | 0.15                            | 3.41                                                       | 0.11                           | >=5.00                       | >=5.00                                                  | 0.11                           | >=5.00                       | >=5.00                                                  |
| >0359                                 | mccB           | SAUR0457 (SAR_RS02285)  | 0.00                              | 1.40                            | 0.17                                                       | 0.00                           | 1.40                         | 0.17                                                    | 0.09                           | 1.49                         | 0.25                                                    |
| >0360                                 | metN2          | SAUR0458 (SAR_RS02290)  | 0.00                              | 1.17                            | 0.49                                                       | 0.00                           | 1.17                         | 0.49                                                    | 0.00                           | 1.17                         | 0.49                                                    |
| >0361                                 | metP2          | SAUR0459 (SAR_RS02295)  | 0.00                              | 1.06                            | 0.61                                                       | 0.00                           | 1.06                         | 0.61                                                    | 0.00                           | 1.06                         | 0.61                                                    |
| >0362                                 | metQ2=spn-gmpC | SAUR0460 (SAR_RS02300)  | 0.00                              | 2.02                            | 0.95                                                       | 0.00                           | 2.02                         | 0.95                                                    | 0.12                           | 2.14                         | 1.07                                                    |
| >0363                                 | aaa=sls1       | (N/A)                   | 0.00                              | 1.79                            | 1.59                                                       | 0.00                           | 1.79                         | 1.59                                                    | 0.10                           | 1.88                         | 1.69                                                    |
| >0364                                 | QSHIL1         | SAUR0462 (SAR_RS02310)  | 0.00                              | 0.74                            | 1.11                                                       | 0.00                           | 0.74                         | 1.11                                                    | 0.00                           | 0.74                         | 1.11                                                    |
| >0365                                 | nudG           | SAUR0463 (SAR_RS02315)  | 0.00                              | 0.76                            | 0.25                                                       | 0.00                           | 0.76                         | 0.25                                                    | 0.00                           | 0.76                         | 0.25                                                    |
| >0366                                 | btdD           | SAUR0464 (SAR_RS02320)  | 0.00                              | 1.65                            | 2.26                                                       | 0.00                           | 1.65                         | 2.26                                                    | 0.00                           | 1.65                         | 2.26                                                    |
| >0367                                 | yibF           | SAUR0465 (SAR_RS02325)  | 0.00                              | 0.89                            | 0.64                                                       | 0.00                           | 0.89                         | 0.64                                                    | 0.00                           | 0.89                         | 0.64                                                    |
| >0368                                 | yibE           | SAUR0466 (SAR_RS02330)  | 0.09                              | 1.44                            | 0.63                                                       | 0.00                           | 1.35                         | 0.54                                                    | 0.00                           | 1.35                         | 0.54                                                    |
| >0369                                 | glfC           | SAUR0467 (SAR_RS02335)  | 0.00                              | 1.92                            | 1.47                                                       | 0.00                           | 1.92                         | 1.47                                                    | 0.00                           | 1.92                         | 1.47                                                    |
| >0370                                 | glfB           | SAUR0468 (SAR_RS02340)  | 0.07                              | 0.80                            | 0.42                                                       | 0.07                           | 0.80                         | 0.42                                                    | 0.07                           | 0.80                         | 0.42                                                    |
| >0371                                 | glfD           | SAUR0469 (SAR_RS02345)  | 0.00                              | 0.91                            | 0.75                                                       | 0.00                           | 0.91                         | 0.75                                                    | 0.00                           | 0.91                         | 0.75                                                    |
| >0372                                 | treP           | SAUR0471 (SAR_RS02355)  | 0.07                              | 1.12                            | 0.77                                                       | 0.07                           | 1.12                         | 0.77                                                    | 0.07                           | 1.12                         | 0.77                                                    |
| >0373                                 | treC           | SAUR0472 (SAR_RS02360)  | 0.06                              | 0.91                            | 0.49                                                       | 0.06                           | 0.91                         | 0.49                                                    | 0.06                           | 0.91                         | 0.49                                                    |
| >0374                                 | treR           | SAUR0473 (SAR_RS02365)  | 0.00                              | 1.51                            | 0.69                                                       | 0.00                           | 1.51                         | 0.69                                                    | 0.00                           | 1.51                         | 0.69                                                    |
| >0375                                 | QSHIK0         | SAUR0475 (SAR_RS02375)  | 0.19                              | 1.71                            | 0.00                                                       | 0.19                           | 1.71                         | 0.00                                                    | 0.19                           | 1.71                         | 0.00                                                    |
| >0376                                 | dnaX           | SAUR0476 (SAR_RS02380)  | 0.06                              | 1.41                            | 0.29                                                       | 0.12                           | 1.47                         | 0.35                                                    | 0.12                           | 1.47                         | 0.35                                                    |
| >0377                                 | yaak           | SAUR0477 (SAR_RS02385)  | 0.00                              | 0.00                            | 0.00                                                       | 0.00                           | 0.00                         | 0.00                                                    | 0.00                           | 0.00                         | 0.00                                                    |
| >0378                                 | reck           | SAUR0478 (SAR_RS02390)  | 0.00                              | 0.67                            | 0.00                                                       | 0.00                           | 0.67                         | 0.00                                                    | 0.00                           | 0.67                         | 0.00                                                    |
| >0379                                 | yaaD           | SAUR0484 (SAR_RS02430)  | 0.00                              | 1.25                            | 0.60                                                       | 0.00                           | 1.49                         | 0.75                                                    | 0.00                           | 1.49                         | 0.75                                                    |
| >0380                                 | tmk            | SAUR0485 (SAR_RS02425)  | 0.00                              | 0.65                            | 0.49                                                       | 0.00                           | 0.65                         | 0.49                                                    | 0.00                           | 0.65                         | 0.49                                                    |
| >0381                                 | darA           | SAUR0486 (SAR_RS02430)  | 0.00                              | 0.00                            | 0.00                                                       | 0.00                           | 0.00                         | 0.00                                                    | 0.00                           | 0.00                         | 0.00                                                    |
| >0382                                 | holB           | SAUR0488 (SAR_RS02440)  | 0.00                              | 0.65                            | 0.32                                                       | 0.00                           | 0.65                         | 0.32                                                    | 0.00                           | 0.65                         | 0.32                                                    |
| >0383                                 | yaaT=tpl       | SAUR0489 (SAR_RS02445)  | 0.12                              | 1.12                            | 0.62                                                       | 0.12                           | 1.12                         | 0.62                                                    | 0.12                           | 1.12                         | 0.62                                                    |
| >0384                                 | yabA           | SAUR0490 (SAR_RS02450)  | 0.00                              | 0.00                            | 0.00                                                       | 0.00                           | 0.00                         | 0.00                                                    | 0.00                           | 0.00                         | 0.00                                                    |
| >0385                                 | yabB           | SAUR0491 (SAR_RS02455)  | 0.00                              | 1.24                            | 0.96                                                       | 0.00                           | 1.24                         | 0.96                                                    | 0.00                           | 1.24                         | 0.96                                                    |
| >0386                                 | yaaZ           | (N/A)                   | 0.00                              | >=5.00                          | >=5.00                                                     | 0.00                           | >=5.00                       | >=5.00                                                  | 0.00                           | >=5.00                       | >=5.00                                                  |
| >0387                                 | rsml           | SAUR0493 (SAR_RS02465)  | 0.00                              | 0.48                            | 0.60                                                       | 0.00                           | 0.48                         | 0.60                                                    | 0.00                           | 0.48                         | 0.60                                                    |
| >0388                                 | metS=metG      | SAUR0495 (SAR_RS02475)  | 0.05                              | 0.96                            | 0.86                                                       | 0.00                           | 0.91                         | 0.81                                                    | 0.00                           | 0.91                         | 0.81                                                    |
| >0389                                 | tatP=tatD=ycfH | SAUR0496 (SAR_RS02480)  | 0.00                              | 0.00                            | 0.52                                                       | 0.00                           | 0.65                         | 0.52                                                    | 0.00                           | 0.65                         | 0.52                                                    |
| >0390                                 | rnmV           | SAUR0497 (SAR_RS02485)  | 0.00                              | >=5.00                          | 0.56                                                       | 0.00                           | >=5.00                       | 0.56                                                    | 0.00                           | >=5.00                       | 0.56                                                    |
| >0391                                 | ksgA=rsmA      | (N/A)                   | 0.00                              | >=5.00                          | 0.56                                                       | 0.11                           | >=5.00                       | 0.67                                                    | 0.11                           | >=5.00                       | 0.67                                                    |
| >0392                                 | veg            | (N/A)                   | 0.00                              | 0.00                            | 0.00                                                       | 0.00                           | 0.00                         | 0.00                                                    | 0.00                           | 0.00                         | 0.00                                                    |
| >0393                                 | hpf            | SAUR0500 (SAR_RS02500)  | 0.00                              | 1.06                            | 1.06                                                       | 0.00                           | 0.94                         | 1.06                                                    | 0.00                           | 0.94                         | 1.06                                                    |
| >0394                                 | purR           | SAUR0501 (SAR_RS02505)  | 0.00                              | 0.24                            | 2.40                                                       | 0.12                           | 0.12                         | 0.24                                                    | 0.12                           | 0.48                         | 0.24                                                    |
| >0395                                 | yabJ=ridA      | SAUR0502 (SAR_RS02510)  | 0.00                              | 2.10                            | 0.26                                                       | 0.00                           | 2.10                         | 0.26                                                    | 0.00                           | 2.10                         | 0.26                                                    |
| >0396                                 | spoVG          | SAUR0503 (SAR_RS02515)  | 0.00                              | 0.00                            | 0.00                                                       | 0.00                           | 0.00                         | 0.00                                                    | 0.00                           | 0.00                         | 0.00                                                    |
| >0397                                 | glmU           | SAUR0505 (SAR_RS02525)  | 0.07                              | 0.89                            | 0.22                                                       | 0.00                           | 0.81                         | 0.15                                                    | 0.00                           | 0.81                         | 0.15                                                    |
| >0398                                 | prs            | SAUR0506 (SAR_RS02530)  | 0.00                              | 0.10                            | 0.21                                                       | 0.00                           | 0.10                         | 0.21                                                    | 0.00                           | 0.10                         | 0.21                                                    |
| >0399                                 | rlpY           | SAUR0508 (SAR_RS02540)  | 0.00                              | 0.31                            | 0.31                                                       | 0.00                           | 0.31                         | 0.31                                                    | 0.00                           | 0.31                         | 0.31                                                    |
| >0400                                 | pth            | SAUR0509 (SAR_RS02545)  | 0.00                              | 1.05                            | 0.70                                                       | 0.00                           | 1.05                         | 0.70                                                    | 0.00                           | 1.05                         | 0.70                                                    |
| >0401                                 | mfd            | SAUR0510 (SAR_RS02550)  | 0.00                              | >=5.00                          | 0.65                                                       | 0.06                           | >=5.00                       | 0.74                                                    | 0.06                           | >=5.00                       | 0.74                                                    |
| >0402                                 | yabM           | SAUR0511 (SAR_RS02555)  | 0.00                              | 3.34                            | 1.31                                                       | 0.00                           | 3.34                         | 1.31                                                    | 0.00                           | 3.34                         | 1.31                                                    |
| >0403                                 | rmazG          | SAUR0512 (SAR_RS02560)  | 0.00                              | 0.50                            | 0.84                                                       | 0.08                           | 0.59                         | 0.92                                                    | 0.08                           | 0.59                         | 0.92                                                    |
| >0404                                 | hslR           | SAUR0513 (SAR_RS02565)  | 0.38                              | 0.38                            | 0.38                                                       | 0.38                           | 0.38                         | 0.38                                                    | 0.38                           | 0.38                         | 0.38                                                    |
| >0405                                 | diviC          | SAUR0514 (SAR_RS02570)  | 0.00                              | 0.25                            | 0.51                                                       | 0.00                           | 0.25                         | 0.51                                                    | 0.00                           | 0.25                         | 0.51                                                    |
| >0406                                 | yabR           | SAUR0515 (SAR_RS02575)  | 0.00                              | 0.25                            | 0.25                                                       | 0.00                           | 0.25                         | 0.25                                                    | 0.00                           | 0.25                         | 0.25                                                    |
| >0407                                 | hgt            | SAUR0516 (SAR_RS02580)  | 0.00                              | 0.69                            | 0.69                                                       | 0.00                           | 0.69                         | 0.69                                                    | 0.00                           | 0.69                         | 0.69                                                    |
| >0408                                 | hpt            | SAUR0517 (SAR_RS02585)  | 0.00                              | 0.37                            | 0.56                                                       | 0.37                           | 0.56                         | 0.56                                                    | 0.37                           | 0.56                         | 0.56                                                    |
| >0409                                 | ftsH           | SAUR0518 (SAR_RS02590)  | 0.00                              | 0.33                            | 0.33                                                       | 0.00                           | 0.33                         | 0.33                                                    | 0.00                           | 0.33                         | 0.33                                                    |
| >0410                                 | hslO           | SAUR0519 (SAR_RS02595)  | 0.00                              | 0.34                            | 0.00                                                       | 0.00                           | 0.34                         | 0.00                                                    | 0.00                           | 0.34                         | 0.00                                                    |
| >0411                                 | cysK           | SAUR0520 (SAR_RS02600)  | 0.11                              | 0.64                            | 0.54                                                       | 0.00                           | 0.54                         | 0.43                                                    | 0.11                           | 0.64                         | 0.54                                                    |
| >0412                                 | folP           | SAUR0521 (SAR_RS02605)  | 0.00                              | 3.98                            | 0.75                                                       | 0.12                           | 4.10                         | 0.87                                                    | 0.00                           | 3.98                         | 0.75                                                    |
| >0413                                 | folB           | SAUR0522 (SAR_RS02610)  | 0.00                              | 0.55                            | 0.27                                                       | 0.00                           | 0.55                         | 0.27                                                    | 0.00                           | 0.55                         | 0.27                                                    |
| >0414                                 | foiK           | SAUR0523 (SAR_RS02615)  | 0.00                              | 1.08                            | 1.08                                                       | 0.00                           | 1.08                         | 1.08                                                    | 0.00                           | 1.08                         | 1.08                                                    |
| >0415                                 | lys_ leader    | (N/A)                   | 0.00                              | 1.08                            | 1.08                                                       | 0.00                           | 1.08                         | 1.08                                                    | 0.00                           | 1.08                         | 1.08                                                    |
| >0416                                 | lysS           | SAUR0525 (SAR_RS02625)  | 0.00                              | 0.74                            | 0.47                                                       | 0.00                           | 0.74                         | 0.47                                                    | 0.00                           | 0.74                         | 0.47                                                    |
| >0417                                 | pdxR           | SAUR0541 (SAR_RS02705)  | >=5.00                            | >=5.00                          | >=5.00                                                     | 0.00                           | 4.19                         | 0.58                                                    | 0.07                           | 4.27                         | 0.65                                                    |
| >0418                                 | pdxS           | SAUR0542 (SAR_RS02710)  | 0.00                              | 3.27                            | 0.45                                                       | 0.00                           | 3.27                         | 0.45                                                    | 0.00                           | 3.27                         | 0.45                                                    |
| >0419                                 | pdxT           | SAUR0543 (SAR_RS02715)  | 0.00                              | 0.18                            | 0.00                                                       | 0.00                           | 0.18                         | 0.00                                                    | 0.00                           | 0.18                         | 0.00                                                    |
| >0420                                 | nupC1          | SAUR0545 (SAR_RS02725)  | 0.00                              | 0.58                            | 0.25                                                       | 0.00                           | 0.58                         | 0.25                                                    | 0.00                           | 0.58                         | 0.25                                                    |
| >0421                                 | ctrK           | SAUR0546 (SAR_RS02730)  | 0.00                              | 1.30                            | 0.43                                                       | 0.00                           | 1.30                         | 0.43                                                    | 0.00                           | 1.30                         | 0.43                                                    |
| >0422                                 | mcsA           | SAUR0547 (SAR_RS02735)  | 0.00                              | 0.18                            | 0.35                                                       | 0.00                           | 0.18                         | 0.35                                                    | 0.00                           | 0.18                         | 0.35                                                    |
| >0423                                 | mcsB           | SAUR0548 (SAR_RS02740)  | 0.00                              | 0.20                            | 0.20                                                       | 0.10                           | 0.30                         | 0.30                                                    | 0.10                           | 0.30                         | 0.30                                                    |
| >0424                                 | clpC           | SAUR0549 (SAR_RS02745)  | 0.08                              | 0.57                            | 0.49                                                       | 0.00                           | 0.49                         | 0.41                                                    | 0.00                           | 0.49                         | 0.41                                                    |
| >0425                                 | radA           | SAUR0551 (SAR_RS02755)  | 0.07                              | 0.37                            | 0.37                                                       | 0.00                           | 0.29                         | 0.29                                                    | 0.00                           | 0.29                         | 0.29                                                    |
| >0426                                 | pilT           | SAUR0552 (SAR_RS02760)  | 0.00                              | 1.58                            | 0.28                                                       | 0.09                           | 1.68                         | 0.37                                                    | 0.09                           | 1.68                         | 0.37                                                    |
| >0427                                 | glfX           | SAUR0553 (SAR_RS02765)  | 0.00                              | 1.03                            | 0.62                                                       | 0.07                           | 1.10                         | 0.69                                                    | 0.07                           | 1.10                         | 0.69                                                    |
| >0428                                 | cysE           | SAUR0554 (SAR_RS02770)  | 0.00                              | 0.16                            | 0.31                                                       | 0.00                           | 0.16                         | 0.31                                                    | 0.00                           | 0.16                         | 0.31                                                    |
| >0429                                 | cysS           | SAUR0555 (SAR_RS02775)  | 0.00                              | 1.21                            | 0.43                                                       | 0.00                           | 1.21                         | 0.43                                                    | 0.00                           | 1.21                         | 0.43                                                    |
| >0430                                 | mmC            | SAUR0556 (SAR_RS02780)  | 0.00                              | 0.49                            | 0.00                                                       | 0.00                           | 0.49                         | 0.00                                                    | 0.00                           | 0.49                         | 0.00                                                    |
| >0431                                 |                |                         |                                   |                                 |                                                            |                                |                              |                                                         |                                |                              |                                                         |

| Number/<br>Position in the<br>figures | Gene ID          | ID in PubMLST cg scheme         | ED133 vs. swan<br>isolate 15V8707 | X22 vs. swan isolate<br>15V8707 | CC522 goat isolate<br>17CS1042 vs. swan<br>isolate 15V8707 | ED133 vs. duck<br>isolate V315 | X22 vs. duck isolate<br>V315 | CC522 goat isolate<br>17CS1042 vs. duck<br>isolate V315 | ED133 vs. duck<br>isolate V482 | X22 vs. duck isolate<br>V482 | CC522 goat isolate<br>17CS1042 vs. duck<br>isolate V482 |
|---------------------------------------|------------------|---------------------------------|-----------------------------------|---------------------------------|------------------------------------------------------------|--------------------------------|------------------------------|---------------------------------------------------------|--------------------------------|------------------------------|---------------------------------------------------------|
| >0482                                 | yfnA2            | SAUR0607 (SAR_RS03035)          | 0.07                              | 0.81                            | 0.40                                                       | 0.00                           | 0.74                         | 0.34                                                    | 0.07                           | 0.81                         | 0.40                                                    |
| >0483                                 | DUF3815          | SAUR0608 (SAR_RS03040)          | 0.00                              | >=5.00                          | 0.44                                                       | 0.00                           | >=5.00                       | 0.44                                                    | 0.00                           | >=5.00                       | 0.44                                                    |
| >0484                                 | DUF1212_L1       | SAUR0609 (SAR_RS03045)          | 0.00                              | 1.44                            | 1.18                                                       | 0.00                           | 1.44                         | 1.18                                                    | 0.00                           | 1.44                         | 1.18                                                    |
| >0485                                 | hemQ             | SAUR0610 (SAR_RS03050)          | 0.00                              | 0.66                            | 0.40                                                       | 0.00                           | 0.66                         | 0.40                                                    | 0.00                           | 0.66                         | 0.40                                                    |
| >0486                                 | pta              | SAUR0611 (SAR_RS03055)          | 0.20                              | 0.61                            | 0.20                                                       | 0.00                           | 0.40                         | 0.00                                                    | 0.10                           | 0.51                         | 0.10                                                    |
| >0487                                 | lipI             | SAUR0612 (SAR_RS03060)          | 0.12                              | 0.60                            | 0.48                                                       | 0.12                           | 0.60                         | 0.48                                                    | 0.12                           | 0.60                         | 0.48                                                    |
| >0488                                 | mvaK1            | SAUR0613 (SAR_RS03065)          | 0.00                              | 1.30                            | 0.33                                                       | 0.00                           | 1.30                         | 0.33                                                    | 0.00                           | 1.30                         | 0.33                                                    |
| >0489                                 | mvaD             | SAUR0614 (SAR_RS03070)          | 0.20                              | 1.42                            | 0.61                                                       | 0.10                           | 1.32                         | 0.51                                                    | 0.20                           | 1.42                         | 0.61                                                    |
| >0490                                 | mvaK2            | SAUR0615 (SAR_RS03075)          | 0.00                              | 0.37                            | 0.46                                                       | 0.00                           | 0.37                         | 0.46                                                    | 0.00                           | 0.37                         | 0.46                                                    |
| >0491                                 | DUF1450          | SAUR0616 (SAR_RS03080)          | 0.29                              | 0.29                            | 0.58                                                       | 0.00                           | 0.00                         | 0.29                                                    | 0.00                           | 0.00                         | 0.29                                                    |
| >0492                                 | YnfJ             | SAUR0617 (SAR_RS03085)          | 0.00                              | 2.34                            | 0.38                                                       | 0.00                           | 2.27                         | 0.36                                                    | 0.00                           | 2.27                         | 0.36                                                    |
| >0493                                 | QSH181           | SAUR0618 (SAR_RS03090)          | 0.00                              | 0.17                            | 0.23                                                       | 0.00                           | 0.17                         | 0.23                                                    | 0.00                           | 0.17                         | 0.23                                                    |
| >0494                                 | QSH179           | SAUR0620 (SAR_RS03100)          | 0.07                              | >=5.00                          | >=5.00                                                     | 0.00                           | >=5.00                       | >=5.00                                                  | 0.00                           | >=5.00                       | >=5.00                                                  |
| >0495                                 | QSH167=iolS      | SAUR0625 (SAR_RS03125)          | 0.00                              | 0.64                            | 0.64                                                       | 0.00                           | 0.64                         | 0.64                                                    | 0.00                           | 0.64                         | 0.64                                                    |
| >0496                                 | QSH166           | SAUR0626 (SAR_RS03130)          | 0.00                              | 0.37                            | 0.19                                                       | 0.00                           | 0.37                         | 0.19                                                    | 0.00                           | 0.37                         | 0.19                                                    |
| >0497                                 | Q8NXU4           | SAUR0627 (SAR_RS03135)          | 0.21                              | 0.21                            | 0.63                                                       | 0.21                           | 0.21                         | 0.63                                                    | 0.21                           | 0.21                         | 0.63                                                    |
| >0498                                 | QSH165           | SAUR0628 (SAR_RS03140)          | 0.08                              | 0.69                            | 0.31                                                       | 0.00                           | 0.62                         | 0.23                                                    | 0.00                           | 0.62                         | 0.23                                                    |
| >0499                                 | ywhD             | SAUR0629 (SAR_RS03145)          | 0.00                              | 0.30                            | 0.19                                                       | 0.00                           | 0.00                         | 0.19                                                    | 0.00                           | 0.00                         | 0.19                                                    |
| >0500                                 | adhA=adhP        | SAUR0630 (SAR_RS03150)          | 0.00                              | 0.49                            | 0.30                                                       | 0.00                           | 0.49                         | 0.30                                                    | 0.00                           | 0.49                         | 0.30                                                    |
| >0501                                 | ywhB=DUF1934     | SAUR0632 (SAR_RS03160)          | 0.00                              | 0.70                            | 0.70                                                       | 0.00                           | 0.70                         | 0.70                                                    | 0.00                           | 0.70                         | 0.70                                                    |
| >0502                                 | argS             | SAUR0633 (SAR_RS03165)          | 0.00                              | 0.66                            | 0.42                                                       | 0.00                           | 0.66                         | 0.42                                                    | 0.00                           | 0.66                         | 0.42                                                    |
| >0503                                 | nth2             | SAUR0634 (SAR_RS03170)          | 0.00                              | 2.83                            | 0.00                                                       | 0.00                           | 2.83                         | 0.00                                                    | 0.00                           | 2.83                         | 0.00                                                    |
| >0504                                 | ASIQG3           | SAUR0635 (SAR_RS03175)          | 0.00                              | 0.90                            | 0.34                                                       | 0.00                           | 0.90                         | 0.34                                                    | 0.00                           | 0.90                         | 0.34                                                    |
| >0505                                 | yvrF=yibE        | SAUR2983                        | 0.00                              | 1.26                            | 1.16                                                       | 0.00                           | 1.26                         | 1.16                                                    | 0.11                           | 1.37                         | 1.26                                                    |
| >0506                                 | ppaX2            | SAUR0637 (SAR_RS03185)          | 0.14                              | 0.67                            | 0.83                                                       | 0.00                           | 0.63                         | 0.87                                                    | 0.00                           | 0.63                         | 0.87                                                    |
| >0507                                 | ydpJ             | SAUR0638 (SAR_RS03190)          | 0.00                              | 1.12                            | 0.87                                                       | 0.25                           | 1.12                         | 0.25                                                    | 0.00                           | 1.37                         | 1.12                                                    |
| >0508                                 | QSH154           | SAUR0639 (SAR_RS03195)          | 0.00                              | 0.99                            | 0.20                                                       | 0.00                           | 0.99                         | 0.20                                                    | 0.00                           | 0.99                         | 0.20                                                    |
| >0509                                 | QSH153           | SAUR0640 (SAR_RS03200)          | 0.00                              | 0.28                            | 0.28                                                       | 0.00                           | 0.28                         | 0.28                                                    | 0.00                           | 0.28                         | 0.28                                                    |
| >0510                                 | QSH152=piP       | SAUR0641 (SAR_RS03205)          | 0.13                              | 1.14                            | 0.38                                                       | 0.00                           | 1.01                         | 0.25                                                    | 0.00                           | 1.01                         | 0.25                                                    |
| >0511                                 | sarA             | (N/A)                           | 0.00                              | 0.00                            | 0.00                                                       | 0.00                           | 0.00                         | 0.00                                                    | 0.00                           | 0.00                         | 0.00                                                    |
| >0512                                 | Q21SV2           | SAUR0643 (SAR_RS03215)          | 0.00                              | >=5.00                          | 0.11                                                       | 0.00                           | >=5.00                       | 0.11                                                    | 0.00                           | >=5.00                       | 0.11                                                    |
| >0513                                 | ASQ11=+DUF2922   | SAUR0644 (SAR_RS03220)          | 0.00                              | 0.44                            | 0.00                                                       | 0.00                           | 0.44                         | 0.00                                                    | 0.00                           | 0.00                         | 0.00                                                    |
| >0514                                 | Q7A1N3=DUF1659   | SAUR0645 (SAR_RS03225)          | 0.00                              | 1.43                            | 0.00                                                       | 0.00                           | 1.43                         | 0.00                                                    | 0.00                           | 1.43                         | 0.00                                                    |
| >0515                                 | ASIQH4           | SAUR0646 (SAR_RS03230)          | 0.00                              | 1.07                            | 0.53                                                       | 0.00                           | 1.07                         | 0.53                                                    | 0.00                           | 1.07                         | 0.53                                                    |
| >0516                                 | mmpA             | SAUR0647 (SAR_RS03235)          | 0.04                              | 2.62                            | 2.87                                                       | 0.00                           | 2.58                         | 2.83                                                    | 0.04                           | 2.62                         | 2.87                                                    |
| >0517                                 | mmpB             | SAUR0648 (SAR_RS03240)          | 0.00                              | >=5.00                          | >=5.00                                                     | 0.00                           | >=5.00                       | >=5.00                                                  | 0.00                           | >=5.00                       | >=5.00                                                  |
| >0518                                 | mmpC             | SAUR0649 (SAR_RS03245)          | 0.00                              | 1.45                            | 0.87                                                       | 0.29                           | 1.73                         | 1.16                                                    | 0.00                           | 1.45                         | 0.87                                                    |
| >0519                                 | mmpD             | SAUR0650 (SAR_RS03250)          | 0.00                              | 4.81                            | 4.21                                                       | 0.00                           | 4.81                         | 4.21                                                    | 0.00                           | 4.81                         | 4.21                                                    |
| >0520                                 | mmpE             | SAUR0651 (SAR_RS03255)          | 0.00                              | 1.04                            | 0.41                                                       | 0.00                           | 1.04                         | 0.41                                                    | 0.00                           | 1.04                         | 0.41                                                    |
| >0521                                 | mmpF             | SAUR0652 (SAR_RS03260)          | 0.00                              | 0.66                            | 0.00                                                       | 0.00                           | 0.66                         | 0.00                                                    | 0.00                           | 0.66                         | 0.00                                                    |
| >0522                                 | mmpG             | (N/A)                           | 0.00                              | 1.37                            | 0.00                                                       | 0.00                           | 1.37                         | 0.00                                                    | 0.00                           | 1.37                         | 0.00                                                    |
| >0523                                 | nhaK1            | SAUR0654 (SAR_RS03270)          | 0.00                              | 0.49                            | 0.34                                                       | 0.00                           | 0.49                         | 0.34                                                    | 0.00                           | 0.49                         | 0.34                                                    |
| >0524                                 | mntC             | SAUR0658 (SAR_RS03290)          | 0.11                              | 0.43                            | 0.43                                                       | 0.00                           | 0.32                         | 0.32                                                    | 0.00                           | 0.32                         | 0.32                                                    |
| >0525                                 | mntB             | SAUR0659 (SAR_RS03295)          | 0.00                              | 0.12                            | 0.24                                                       | 0.00                           | 0.12                         | 0.24                                                    | 0.00                           | 0.12                         | 0.24                                                    |
| >0526                                 | mntA             | SAUR0660 (SAR_RS03300)          | 0.00                              | 0.00                            | 0.27                                                       | 0.00                           | 0.00                         | 0.27                                                    | 0.00                           | 0.00                         | 0.27                                                    |
| >0527                                 | mntR             | SAUR0661 (SAR_RS03305)          | 0.00                              | 1.09                            | 1.09                                                       | 0.00                           | 1.09                         | 1.09                                                    | 0.00                           | 1.09                         | 1.09                                                    |
| >0528                                 | QSH133           | SAUR0662 (SAR_RS03310)          | 0.00                              | 0.00                            | 0.13                                                       | 0.00                           | 0.00                         | 0.13                                                    | 0.00                           | 0.00                         | 0.13                                                    |
| >0529                                 | tarA=tagA        | SAUR0663 (SAR_RS03315)          | 0.13                              | 1.31                            | 0.26                                                       | 0.00                           | 1.18                         | 0.13                                                    | 0.00                           | 1.18                         | 0.13                                                    |
| >0530                                 | tarH=tagH        | SAUR0664 (SAR_RS03320)          | 0.00                              | 0.38                            | 0.00                                                       | 0.00                           | 0.38                         | 0.00                                                    | 0.00                           | 0.38                         | 0.00                                                    |
| >0531                                 | tarG=tagG        | SAUR0665 (SAR_RS03325)          | 0.00                              | 0.60                            | 0.00                                                       | 0.00                           | 0.60                         | 0.00                                                    | 0.00                           | 0.60                         | 0.00                                                    |
| >0532                                 | tarB=tagB        | SAUR0666 (SAR_RS03330)          | 0.00                              | 1.27                            | 0.91                                                       | 0.00                           | 1.27                         | 0.91                                                    | 0.00                           | 1.27                         | 0.91                                                    |
| >0533                                 | tarX             | SAUR0667 (SAR_RS03335)          | 0.09                              | 1.32                            | 0.38                                                       | 0.09                           | 1.32                         | 0.38                                                    | 0.09                           | 1.32                         | 0.38                                                    |
| >0534                                 | tarD=tagD        | SAUR0668 (SAR_RS03340)          | 0.00                              | 0.00                            | 0.50                                                       | 0.00                           | 0.00                         | 0.50                                                    | 0.00                           | 0.00                         | 0.50                                                    |
| >0535                                 | pbpD=pbp4=dacA   | SAUR0669 (SAR_RS03345)          | 0.00                              | 1.39                            | 0.62                                                       | 0.00                           | 1.39                         | 0.62                                                    | 0.00                           | 1.39                         | 0.62                                                    |
| >0536                                 | msbA1            | SAUR0670 (SAR_RS03350)          | 0.00                              | 1.16                            | 0.00                                                       | 0.00                           | 1.16                         | 0.00                                                    | 0.00                           | 1.16                         | 0.00                                                    |
| >0537                                 | nupG             | SAUR0671 (SAR_RS03355)          | 0.00                              | 0.57                            | 0.24                                                       | 0.00                           | 0.57                         | 0.24                                                    | 0.00                           | 0.57                         | 0.24                                                    |
| >0538                                 | yxkD=yiF=DUF2197 | SAUR0673 (SAR_RS03365)          | 0.00                              | 0.96                            | 0.00                                                       | 0.00                           | 0.96                         | 0.00                                                    | 0.00                           | 0.96                         | 0.00                                                    |
| >0539                                 | fluC             | SAUR0674 (SAR_RS03370)          | 0.00                              | 0.75                            | 0.25                                                       | 0.00                           | 0.75                         | 0.25                                                    | 0.13                           | 0.88                         | 0.38                                                    |
| >0540                                 | fluB             | SAUR0675 (SAR_RS03375)          | 0.00                              | 1.30                            | 0.00                                                       | 0.00                           | 0.30                         | 0.00                                                    | 0.10                           | 0.40                         | 0.10                                                    |
| >0541                                 | fluG             | SAUR0676 (SAR_RS03380)          | 0.00                              | 0.47                            | 0.20                                                       | 0.00                           | 1.57                         | 0.29                                                    | 0.00                           | 1.57                         | 0.29                                                    |
| >0542                                 | dakK=dhaK        | SAUR0677 (SAR_RS03385)          | 0.10                              | 1.76                            | 0.76                                                       | 0.10                           | 1.76                         | 0.76                                                    | 0.10                           | 1.76                         | 0.76                                                    |
| >0543                                 | dakL=dhaf        | SAUR0678 (SAR_RS03390)          | 0.00                              | 1.20                            | 0.00                                                       | 0.00                           | 1.20                         | 0.00                                                    | 0.00                           | 1.20                         | 0.00                                                    |
| >0544                                 | dakP=dhaM        | SAUR0679 (SAR_RS03395)          | 0.00                              | 1.10                            | 0.00                                                       | 0.55                           | 1.65                         | 0.55                                                    | 0.28                           | 1.38                         | 0.28                                                    |
| >0545                                 | QSH14            | SAUR0680 (SAR_RS03400)          | 0.00                              | 0.20                            | 0.20                                                       | 0.00                           | 0.20                         | 0.20                                                    | 0.00                           | 0.20                         | 0.20                                                    |
| >0546                                 | QSH114           | SAUR0681 (SAR_RS03405)          | 0.00                              | 1.03                            | 0.38                                                       | 0.00                           | 1.03                         | 0.38                                                    | 0.00                           | 1.03                         | 0.38                                                    |
| >0547                                 | lipA             | SAUR0993 (SAR_RS04515)          | 0.10                              | 1.44                            | 1.44                                                       | 0.00                           | 1.34                         | 1.34                                                    | 0.00                           | 1.34                         | 1.34                                                    |
| >0548                                 | QSH12            | SAUR0684 (SAR_RS03410)          | 0.00                              | 1.17                            | 0.80                                                       | 0.00                           | 2.80                         | 1.17                                                    | 0.00                           | 2.80                         | 1.17                                                    |
| >0549                                 | QSH111           | SAUR0685 (SAR_RS03425)          | 0.00                              | 0.20                            | 0.59                                                       | 0.00                           | 0.59                         | 0.59                                                    | 0.00                           | 0.20                         | 0.59                                                    |
| >0550                                 | grax             | SAUR0686 (SAR_RS03430)          | 0.00                              | 0.65                            | 0.00                                                       | 0.00                           | 0.65                         | 0.00                                                    | 0.00                           | 0.65                         | 0.00                                                    |
| >0551                                 | graR             | SAUR0687 (SAR_RS03435)          | 0.15                              | 2.96                            | 0.44                                                       | 0.00                           | 2.81                         | 0.30                                                    | 0.15                           | 2.96                         | 0.44                                                    |
| >0552                                 | graS             | SAUR0688 (SAR_RS03440)          | 0.10                              | 0.48                            | 0.48                                                       | 0.10                           | 0.48                         | 0.48                                                    | 0.10                           | 0.48                         | 0.48                                                    |
| >0553                                 | vraF             | SAUR0689 (SAR_RS03445)          | 0.00                              | >=5.00                          | 0.39                                                       | 0.00                           | >=5.00                       | 0.39                                                    | 0.00                           | >=5.00                       | 0.39                                                    |
| >0554                                 | vraG             | SAUR0690 (SAR_RS03450)          | 0.00                              | 1.11                            | 0.63                                                       | 0.11                           | 1.22                         | 0.74                                                    | 0.05                           | 1.16                         | 0.69                                                    |
| >0555                                 | yhaK=piR         | SAUR0691 (SAR_RS03455)          | 0.00                              | 0.49                            | 0.00                                                       | 0.00                           | 0.49                         | 0.00                                                    | 0.00                           | 0.49                         | 0.00                                                    |
| >0556                                 | pitA             | SAUR0692 (SAR_RS03460)          | 0.00                              | 3.08                            | 3.08                                                       | 0.00                           | 3.08                         | 3.08                                                    | 0.00                           | 3.08                         | 3.08                                                    |
| >0557                                 | ssaA5            | SAUR0693 (SAR_RS03465)          | 0.00                              | 0.50                            | 0.38                                                       | 0.00                           | 0.50                         | 0.38                                                    | 0.13                           | 0.63                         | 0.50                                                    |
| >0558                                 | yetI             | SAUR0694 (SAR_RS03470)          | 0.00                              | 0.47                            | 0.47                                                       | 0.00                           | 0.47                         | 0.47                                                    | 0.00                           | 0.47                         | 0.47                                                    |
| >0559                                 | rbf              | SAUR0695 (SAR_RS03475)=SAUR0695 | 0.00                              | 1.72                            | 0.56                                                       | 0.00                           | 1.72                         | 0.56                                                    | 0.00                           | 1.72                         | 0.56                                                    |
| >0560                                 | sarX             | SAUR0697 (SAR_RS03485)          | 0.23                              | 0.94                            | 0.00                                                       | 0.23                           | 0.94                         | 0.00                                                    | 0.23                           | 0.94                         | 0.00                                                    |
| >0561                                 | yeeI             | SAUR0698 (SAR_RS03490)          | 0.00                              | 0.14                            | 0.70                                                       | 0.00                           | 0.14                         | 0.70                                                    | 0.00                           | 0.14                         | 0.70                                                    |
| >0562                                 | DUF0985          | SAUR0699 (SAR_RS03495)          | 0.00                              | 1.48                            | 0.00                                                       | 0.00                           | 1.48                         | 0.21                                                    | 0.00                           | 1.48                         | 0.21                                                    |
| >0563                                 | ASIQM5=DUF0402   | SAUR0701 (SAR_RS03505)          | 0.00                              | 1.09                            | 0.16                                                       | 0.00                           | 1.09                         | 0.16                                                    | >=5.00                         | >=5.00                       | >=5.00                                                  |
| >0564                                 | ccpE             | SAUR0702 (SAR_RS03510)          | 0.00                              | 2.54                            | 0.23                                                       | 0.00                           | 2.54                         | 0.23                                                    | 0.00                           | 2.54                         | 0.23                                                    |
| >0565                                 | A82196=metA      | SAUR0703 (SAR_RS03515)          | 0.00                              | 1.15                            | 0.33                                                       | 0.00                           | 1.15                         | 0.33                                                    | 0.00                           | 1.15                         | 0.33                                                    |
| >0566                                 | Q2YSN2=DUF456    | (N/A)                           | 0.00                              | 1.23                            | 1.64                                                       | 0.00                           | 1.23                         | 1.64                                                    | 0.00                           | 1.23                         | 1.64                                                    |
| >0567                                 | Q2YSQ6=DUF1129   | SAUR2984                        | 0.14                              | 1.59                            | 0.72                                                       | 0.14                           | 1.59                         | 0.72                                                    | 0.14                           | 1.59                         | 0.72                                                    |
| >0568                                 | ASIQN0           | SAUR0740 (SAR_RS03700)          | 0.00                              | >=5.00                          | 0.00                                                       | 0.00                           | >=5.00                       | 0.00                                                    | 0.00                           | >=5.00                       | 0.00                                                    |
| >0569                                 | ARYZU2           | SAUR0741 (SAR_RS03705)          | 0.00                              | >=5.00                          | >=5.00                                                     | 0.00                           | >=5.00                       | >=5.00                                                  | 0.00                           | >=5.00                       | >=5.00                                                  |
| >0570                                 | QSH742           | SAUR0742 (SAR_RS03710)          | 0.00                              | 1.67                            | 2.00                                                       | 0.00                           | 1.67                         | 2.00                                                    | 0.00                           | 1.67                         | 2.00                                                    |
| >0571                                 | ykkB             | SAUR0743 (SAR_RS03715)          | 0.18                              | 0.74                            | 0.55                                                       | 0.18                           | 0.74                         | 0.55                                                    | 0.18                           | 0.74                         | 0.55                                                    |
| >0572                                 | yvdD             | SAUR0744 (SAR_RS03720)          | 0.00                              | 1.23                            | 0.88                                                       | 0.00                           | 1.23                         | 0.88                                                    | 0.00                           | 1.23                         | 0.88                                                    |
| >0573                                 | yxqD             | SAUR0745 (SAR_RS03725)          | 0.00                              | 1.74                            | 0.22                                                       | 0.00                           | 1.74                         | 0.22                                                    | 0.22                           | 1.74                         | 0.44                                                    |
| >0574                                 | QSHHY6           | SAUR0746 (SAR_RS03730)          | 0.00                              | 1.02                            | 0.29                                                       | 0.00                           | 1.02                         | 0.29                                                    | 0.15                           | 1.17                         | 0.44                                                    |
| >0575                                 | uppP             | SAUR0747 (SAR_RS03735)          | 0.11                              | 1.94                            | 0.11                                                       | 0.23                           | 2.05                         | 0.23                                                    | 0.23                           | 2.05                         | 0.23                                                    |
| >0576                                 | cydD             | SAUR0748 (SAR_RS03740)          | 0.06                              | 1.04                            | 0.12                                                       | 0.00                           | 0.98                         | 0.06                                                    | 0.00                           | 0.98                         | 0.06                                                    |
| >0577                                 | cydC             | SAUR0749 (SAR_RS03745)          | 0.00                              | 1.25                            | 0.84                                                       | 0.00                           | 1.25                         | 0.84                                                    | 0.06                           | 1.48                         | 0.84                                                    |
| >0578                                 | mrgA             | (N/A)                           | 0.00                              | 0.45                            | 0.0                                                        |                                |                              |                                                         |                                |                              |                                                         |



| Number/<br>Position in the<br>figures | Gene ID          | ID in PubMLST cg scheme | ED133 vs. swan<br>isolate 15V8707 | X22 vs. swan isolate<br>15V8707 | CC522 goat isolate<br>17CS1042 vs. swan<br>isolate 15V8707 | ED133 vs. duck<br>isolate V315 | X22 vs. duck isolate<br>V315 | CC522 goat isolate<br>17CS1042 vs. duck<br>isolate V315 | ED133 vs. duck<br>isolate V482 | X22 vs. duck isolate<br>V482 | CC522 goat isolate<br>17CS1042 vs. duck<br>isolate V482 |
|---------------------------------------|------------------|-------------------------|-----------------------------------|---------------------------------|------------------------------------------------------------|--------------------------------|------------------------------|---------------------------------------------------------|--------------------------------|------------------------------|---------------------------------------------------------|
| >0630                                 | murB             | SAUR0806 (SAR_RS04030)  | 0.00                              | 0.65                            | 0.43                                                       | 0.00                           | 0.65                         | 0.43                                                    | 0.00                           | 0.65                         | 0.43                                                    |
| >0631                                 | grpB             | SAUR0807 (SAR_RS04035)  | 0.00                              | 1.16                            | 0.19                                                       | 0.00                           | 1.16                         | 0.19                                                    | 0.00                           | 1.16                         | 0.19                                                    |
| >0632                                 | QSHHT0           | SAUR0808 (SAR_RS04040)  | 0.00                              | 0.91                            | 0.68                                                       | 0.00                           | 0.91                         | 0.68                                                    | 0.11                           | 1.02                         | 0.80                                                    |
| >0633                                 | ytuI             | SAUR0809 (SAR_RS04045)  | 0.00                              | 0.31                            | 0.00                                                       | 0.00                           | 0.31                         | 0.00                                                    | 0.00                           | 0.00                         | 0.00                                                    |
| >0634                                 | glxI2            | SAUR0810 (SAR_RS04050)  | 0.00                              | 1.07                            | >=5.00                                                     | 0.00                           | 1.07                         | >=5.00                                                  | 0.00                           | 1.07                         | >=5.00                                                  |
| >0635                                 | pepT             | SAUR0811 (SAR_RS04055)  | 0.00                              | 0.65                            | 0.81                                                       | 0.00                           | 0.65                         | 0.81                                                    | 0.00                           | 0.65                         | 0.81                                                    |
| >0636                                 | QSHHS6           | SAUR0812 (SAR_RS04060)  | 0.00                              | 0.81                            | 0.20                                                       | 0.00                           | 0.81                         | 0.20                                                    | 0.00                           | 0.81                         | 0.20                                                    |
| >0637                                 | DUF1212_L2=yjIP  | SAUR0813 (SAR_RS04065)  | 0.00                              | 0.79                            | 0.79                                                       | 0.00                           | 0.79                         | 0.79                                                    | 0.13                           | 0.92                         | 0.92                                                    |
| >0638                                 | gdpS             | SAUR0814 (SAR_RS04070)  | 0.00                              | 0.84                            | 0.47                                                       | 0.09                           | 0.93                         | 0.56                                                    | 0.19                           | 1.03                         | 0.65                                                    |
| >0639                                 | tarO             | SAUR0815 (SAR_RS04075)  | 0.00                              | 1.04                            | 0.28                                                       | 0.09                           | 1.14                         | 0.38                                                    | 0.00                           | 1.04                         | 0.28                                                    |
| >0640                                 | QSHHS2           | SAUR0816 (SAR_RS04080)  | 0.12                              | 0.19                            | 0.78                                                       | 0.00                           | 0.93                         | 0.62                                                    | 0.00                           | 0.62                         | 0.62                                                    |
| >0641                                 | degV1-fakB1      | (N/A)                   | 0.00                              | 0.16                            | 0.46                                                       | 0.12                           | 0.58                         | 0.23                                                    | 0.00                           | 0.58                         | 0.69                                                    |
| >0642                                 | comFA            | SAUR0818 (SAR_RS04090)  | 0.00                              | 1.39                            | 0.28                                                       | 0.00                           | 1.39                         | 0.28                                                    | 0.00                           | 1.39                         | 0.28                                                    |
| >0643                                 | comFC            | SAUR0819 (SAR_RS04095)  | 0.00                              | 0.29                            | 0.88                                                       | 0.00                           | 0.88                         | 0.00                                                    | 0.00                           | 0.29                         | 0.88                                                    |
| >0644                                 | yfiA-traiA       | SAUR0820 (SAR_RS04100)  | 0.17                              | 0.35                            | 0.35                                                       | 0.00                           | 0.17                         | 0.17                                                    | 0.00                           | 0.17                         | 0.17                                                    |
| >0645                                 | secA1            | SAUR0821 (SAR_RS04105)  | 0.00                              | 0.71                            | 0.67                                                       | 0.00                           | 0.71                         | 0.67                                                    | 0.00                           | 0.71                         | 0.67                                                    |
| >0646                                 | prfB             | SAUR0823 (SAR_RS04115)  | 0.00                              | >=5.00                          | >=5.00                                                     | 0.00                           | >=5.00                       | >=5.00                                                  | 0.00                           | >=5.00                       | >=5.00                                                  |
| >0647                                 | yyxM             | SAUR0825 (SAR_RS04125)  | 0.00                              | 2.24                            | 0.24                                                       | 0.00                           | 2.24                         | 0.24                                                    | 0.00                           | 2.24                         | 0.24                                                    |
| >0648                                 | yfbR             | SAUR0826 (SAR_RS04130)  | 0.00                              | 1.07                            | 0.15                                                       | 0.00                           | 1.07                         | 0.15                                                    | 0.00                           | 1.07                         | 0.15                                                    |
| >0649                                 | DUF2198          | SAUR0827 (SAR_RS04135)  | 0.00                              | 1.68                            | 2.52                                                       | 0.00                           | 1.68                         | 2.52                                                    | 0.00                           | 1.68                         | 2.52                                                    |
| >0650                                 | uvrB             | SAUR0828 (SAR_RS04140)  | 0.00                              | 1.96                            | 0.25                                                       | 0.00                           | 1.96                         | 0.25                                                    | 0.05                           | 2.01                         | 0.30                                                    |
| >0651                                 | uvrA             | SAUR0829 (SAR_RS04145)  | 0.00                              | 1.54                            | 0.67                                                       | 0.11                           | 1.65                         | 0.77                                                    | 0.04                           | 1.58                         | 0.70                                                    |
| >0652                                 | hpr-hprK         | SAUR0831 (SAR_RS04155)  | 0.00                              | 0.86                            | 0.43                                                       | 0.11                           | 0.96                         | 0.54                                                    | 0.11                           | 0.96                         | 0.54                                                    |
| >0653                                 | igt              | SAUR0832 (SAR_RS04160)  | 0.00                              | 0.95                            | 0.12                                                       | 0.00                           | 0.95                         | 0.12                                                    | 0.00                           | 0.95                         | 0.12                                                    |
| >0654                                 | yycF             | SAUR0833 (SAR_RS04165)  | 0.00                              | 1.68                            | >=5.00                                                     | 0.00                           | >=5.00                       | >=5.00                                                  | 0.00                           | >=5.00                       | >=5.00                                                  |
| >0655                                 | yycD             | SAUR0834 (SAR_RS04170)  | 0.07                              | 1.39                            | 0.76                                                       | 0.14                           | 1.46                         | 0.83                                                    | 0.14                           | 1.46                         | 0.83                                                    |
| >0656                                 | trxR             | SAUR0835 (SAR_RS04175)  | 0.00                              | 0.64                            | 0.32                                                       | 0.00                           | 0.64                         | 0.32                                                    | 0.00                           | 0.64                         | 0.32                                                    |
| >0657                                 | yycI-rapZ        | SAUR0836 (SAR_RS04180)  | 0.00                              | 1.43                            | 0.11                                                       | 0.11                           | 1.54                         | 0.22                                                    | 0.00                           | 1.43                         | 0.11                                                    |
| >0658                                 | mglK-yycK        | SAUR0837 (SAR_RS04185)  | 0.00                              | 0.90                            | 0.90                                                       | 0.00                           | 0.90                         | 0.90                                                    | 0.00                           | 0.90                         | 0.90                                                    |
| >0659                                 | whiA             | SAUR0838 (SAR_RS04190)  | 0.00                              | 0.32                            | 0.00                                                       | 0.00                           | 0.32                         | 0.00                                                    | 0.00                           | 0.32                         | 0.00                                                    |
| >0660                                 | clpP             | SAUR0840 (SAR_RS04200)  | 0.00                              | 0.51                            | 0.17                                                       | 0.00                           | 0.51                         | 0.17                                                    | 0.00                           | 0.51                         | 0.17                                                    |
| >0661                                 | yfiC             | SAUR0842 (SAR_RS04210)  | 0.00                              | 1.11                            | 0.89                                                       | 0.11                           | 1.11                         | 1.00                                                    | 0.00                           | 1.11                         | 0.89                                                    |
| >0662                                 | QSHHP8=DUF4887   | SAUR0843 (SAR_RS04215)  | 0.00                              | 0.63                            | 0.32                                                       | 0.00                           | 0.63                         | 0.32                                                    | 0.00                           | 0.63                         | 0.32                                                    |
| >0663                                 | gapR             | SAUR0844 (SAR_RS04220)  | 0.00                              | 0.69                            | 0.39                                                       | 0.10                           | 0.79                         | 0.49                                                    | 0.10                           | 0.79                         | 0.49                                                    |
| >0664                                 | gapA             | SAUR0845 (SAR_RS04225)  | 0.00                              | 0.30                            | 0.10                                                       | 0.10                           | 0.40                         | 0.20                                                    | 0.10                           | 0.40                         | 0.20                                                    |
| >0665                                 | pgk              | SAUR0846 (SAR_RS04230)  | 0.08                              | 1.01                            | 0.50                                                       | 0.00                           | 0.92                         | 0.42                                                    | 0.00                           | 0.92                         | 0.42                                                    |
| >0666                                 | tpi              | SAUR0847 (SAR_RS04235)  | 0.00                              | 0.79                            | 0.79                                                       | 0.13                           | 0.92                         | 0.92                                                    | 0.00                           | 0.79                         | 0.79                                                    |
| >0667                                 | gpmI             | SAUR0848 (SAR_RS04240)  | 0.00                              | 1.25                            | 0.72                                                       | 0.07                           | 1.32                         | 0.79                                                    | 0.00                           | 1.25                         | 0.72                                                    |
| >0668                                 | eno              | SAUR0849 (SAR_RS04245)  | 0.00                              | 0.23                            | 0.23                                                       | 0.00                           | 0.23                         | 0.23                                                    | 0.00                           | 0.23                         | 0.23                                                    |
| >0669                                 | QZYSE7           | SAUR0850 (SAR_RS04250)  | 0.00                              | 1.31                            | 0.44                                                       | 0.00                           | 1.31                         | 0.44                                                    | 0.22                           | 1.53                         | 0.65                                                    |
| >0670                                 | secG             | SAUR0851 (SAR_RS04255)  | 0.00                              | 0.00                            | 0.00                                                       | 0.00                           | 0.00                         | 0.00                                                    | 0.00                           | 0.00                         | 0.00                                                    |
| >0671                                 | est              | SAUR0852 (SAR_RS04260)  | 0.00                              | >=5.00                          | 0.13                                                       | 0.00                           | >=5.00                       | 0.13                                                    | 0.00                           | >=5.00                       | 0.13                                                    |
| >0672                                 | rnr              | SAUR0853 (SAR_RS04265)  | 0.00                              | >=5.00                          | 1.26                                                       | 0.00                           | >=5.00                       | 1.26                                                    | 0.00                           | >=5.00                       | 1.26                                                    |
| >0673                                 | ssrP-rapZ        | SAUR0854 (SAR_RS04270)  | 0.00                              | 3.01                            | 0.22                                                       | 0.00                           | 3.01                         | 0.22                                                    | 0.00                           | 3.01                         | 0.22                                                    |
| >0674                                 | Q1YB79=DUF5067   | SAUR0856 (SAR_RS04280)  | 0.13                              | 1.96                            | 0.92                                                       | 4.58                           | >=5.00                       | >=5.00                                                  | 4.58                           | >=5.00                       | >=5.00                                                  |
| >0675                                 | QSHS0            | SAUR0858 (SAR_RS04290)  | 0.00                              | 1.77                            | 0.77                                                       | 0.14                           | 1.84                         | 0.96                                                    | 0.14                           | 1.84                         | 0.96                                                    |
| >0676                                 | Q1XJ21           | SAUR0859 (SAR_RS04295)  | 0.00                              | 1.69                            | 0.94                                                       | 0.00                           | 1.69                         | 0.94                                                    | 0.00                           | 1.69                         | 0.94                                                    |
| >0677                                 | cifA             | (N/A)                   | >=5.00                            | >=5.00                          | >=5.00                                                     | >=5.00                         | >=5.00                       | >=5.00                                                  | 4.61                           | >=5.00                       | >=5.00                                                  |
| >0678                                 | vwb              | (N/A)                   | 0.07                              | >=5.00                          | >=5.00                                                     | 0.00                           | >=5.00                       | >=5.00                                                  | 0.07                           | >=5.00                       | >=5.00                                                  |
| >0679                                 | emp              | SAUR0862 (SAR_RS04310)  | 0.00                              | 4.01                            | 1.08                                                       | 0.00                           | 4.01                         | 1.08                                                    | 0.00                           | 4.01                         | 1.08                                                    |
| >0680                                 | vwb2             | SAUR0862 (SAR_RS04310)  | 0.00                              | >=5.00                          | >=5.00                                                     | 0.00                           | >=5.00                       | >=5.00                                                  | 0.19                           | >=5.00                       | >=5.00                                                  |
| >0681                                 | nucI             | SAUR0864 (SAR_RS04320)  | 0.00                              | 1.02                            | 0.00                                                       | 0.00                           | 1.02                         | 0.00                                                    | 0.00                           | 1.02                         | 0.00                                                    |
| >0682                                 | cspK-L1          | (N/A)                   | 0.00                              | 0.00                            | 0.00                                                       | 0.00                           | 0.00                         | 0.00                                                    | 0.00                           | 0.00                         | 0.00                                                    |
| >0683                                 | Q1Y1Z8           | SAUR0866 (SAR_RS04330)  | 0.00                              | 0.91                            | 0.46                                                       | 0.00                           | >=5.00                       | >=5.00                                                  | 0.00                           | 0.91                         | 0.46                                                    |
| >0684                                 | Q2G007           | SAUR0867 (SAR_RS04335)  | 0.00                              | 1.05                            | 0.35                                                       | 0.00                           | 1.05                         | 0.35                                                    | 0.00                           | 1.05                         | 0.35                                                    |
| >0685                                 | Q1YB69           | SAUR0868 (SAR_RS04340)  | 0.00                              | 0.88                            | 0.53                                                       | 0.00                           | 0.88                         | 0.53                                                    | 0.00                           | 0.88                         | 0.53                                                    |
| >0686                                 | Q6GIJ6           | SAUR0869 (SAR_RS04345)  | 0.00                              | 3.17                            | 1.59                                                       | 0.00                           | 3.17                         | 1.59                                                    | 0.00                           | 3.17                         | 1.59                                                    |
| >0687                                 | Q6GIJ5           | SAUR0870 (SAR_RS04350)  | 0.00                              | 0.38                            | 0.38                                                       | 0.00                           | 0.38                         | 0.38                                                    | 0.00                           | 0.38                         | 0.38                                                    |
| >0688                                 | DUF1250          | SAUR0871 (SAR_RS04355)  | 0.00                              | 0.00                            | 0.49                                                       | 0.00                           | 0.00                         | 0.49                                                    | 0.00                           | 0.00                         | 0.49                                                    |
| >0689                                 | Q6GIJ9           | SAUR0872 (SAR_RS04360)  | 0.00                              | 0.12                            | 0.00                                                       | 0.00                           | 0.42                         | 0.00                                                    | 0.00                           | 0.42                         | 0.00                                                    |
| >0690                                 | gpmA1-cobC       | SAUR0873 (SAR_RS04365)  | 0.00                              | 0.85                            | 0.85                                                       | 0.00                           | >=5.00                       | >=5.00                                                  | 0.00                           | >=5.00                       | >=5.00                                                  |
| >0691                                 | yliU1            | SAUR0874 (SAR_RS04370)  | 0.00                              | 1.62                            | 1.94                                                       | 0.00                           | 1.62                         | 1.94                                                    | 0.00                           | 1.62                         | 1.94                                                    |
| >0692                                 | QSHHL4           | SAUR0875 (SAR_RS04375)  | 0.00                              | 0.40                            | 0.20                                                       | 0.00                           | 0.40                         | 0.20                                                    | 0.00                           | 0.40                         | 0.20                                                    |
| >0693                                 | ohrB             | SAUR0876 (SAR_RS04380)  | 0.00                              | 0.95                            | 1.18                                                       | 0.00                           | 0.95                         | 1.18                                                    | 0.00                           | 0.95                         | 1.18                                                    |
| >0694                                 | aroD             | SAUR0877 (SAR_RS04385)  | 0.00                              | 1.67                            | 1.12                                                       | 0.00                           | 1.67                         | 1.12                                                    | 0.00                           | 1.67                         | 1.12                                                    |
| >0695                                 | ntrA             | SAUR0878 (SAR_RS04390)  | 0.19                              | 0.37                            | 0.00                                                       | 0.19                           | 0.37                         | 0.00                                                    | 0.19                           | 0.37                         | 0.00                                                    |
| >0696                                 | trxI-2           | SAUR0879 (SAR_RS04395)  | 0.00                              | 0.00                            | 0.00                                                       | 0.00                           | 0.00                         | 0.00                                                    | 0.00                           | 0.00                         | 0.00                                                    |
| >0697                                 | yusI             | SAUR0880 (SAR_RS04400)  | 0.00                              | 1.12                            | 0.56                                                       | 0.00                           | 1.12                         | 0.56                                                    | 0.00                           | 1.12                         | 0.56                                                    |
| >0698                                 | gcvH2            | SAUR0881 (SAR_RS04405)  | 0.00                              | 0.52                            | 0.26                                                       | 0.00                           | 0.52                         | 0.26                                                    | 0.00                           | 0.52                         | 0.26                                                    |
| >0699                                 | ywqG             | SAUR0883 (SAR_RS04415)  | 0.00                              | 1.71                            | 0.57                                                       | 0.00                           | 1.71                         | 0.57                                                    | 0.11                           | 1.82                         | 0.68                                                    |
| >0700                                 | yusF             | SAUR0884 (SAR_RS04420)  | 0.00                              | 1.29                            | 1.03                                                       | 0.00                           | 1.29                         | 1.03                                                    | 0.00                           | 1.29                         | 1.03                                                    |
| >0701                                 | yusE             | SAUR0885 (SAR_RS04425)  | 0.00                              | 1.01                            | 0.67                                                       | 0.00                           | 1.01                         | 0.67                                                    | 0.00                           | 1.01                         | 0.67                                                    |
| >0702                                 | metN1            | SAUR0886 (SAR_RS04430)  | 0.00                              | 0.68                            | 0.29                                                       | 0.00                           | 0.68                         | 0.29                                                    | 0.10                           | 0.78                         | 0.39                                                    |
| >0703                                 | metP1            | SAUR0887 (SAR_RS04435)  | 0.00                              | 0.86                            | 0.72                                                       | 0.00                           | 0.86                         | 0.72                                                    | 0.00                           | 0.86                         | 0.72                                                    |
| >0704                                 | metQ1            | SAUR0888 (SAR_RS04440)  | 0.00                              | 1.22                            | 0.97                                                       | 0.00                           | 1.22                         | 0.97                                                    | 0.00                           | 1.22                         | 0.97                                                    |
| >0705                                 | csbD-L1          | SAUR0889 (SAR_RS04445)  | 0.00                              | 0.51                            | 0.51                                                       | 0.00                           | 0.51                         | 0.51                                                    | 0.00                           | 0.51                         | 0.51                                                    |
| >0706                                 | DUF0368          | SAUR0890 (SAR_RS04450)  | 0.35                              | 1.53                            | 0.59                                                       | 0.23                           | 1.41                         | 0.47                                                    | 0.23                           | 1.41                         | 0.47                                                    |
| >0707                                 | sufC-yurV        | SAUR0891 (SAR_RS04455)  | 0.00                              | 0.52                            | 0.26                                                       | 0.00                           | 0.52                         | 0.26                                                    | 0.00                           | 0.52                         | 0.26                                                    |
| >0708                                 | sufD             | SAUR0892 (SAR_RS04460)  | 0.15                              | 0.92                            | 0.69                                                       | 0.15                           | 0.92                         | 0.69                                                    | 0.15                           | 0.92                         | 0.69                                                    |
| >0709                                 | sufS             | SAUR0893 (SAR_RS04465)  | 0.00                              | 0.72                            | 0.24                                                       | 0.00                           | 0.72                         | 0.24                                                    | 0.00                           | 0.72                         | 0.24                                                    |
| >0710                                 | sufR-ywqE        | SAUR0894 (SAR_RS04470)  | 0.00                              | 0.00                            | 0.00                                                       | 0.22                           | 0.22                         | 0.22                                                    | 0.22                           | 0.22                         | 0.22                                                    |
| >0711                                 | sufB             | SAUR0895 (SAR_RS04475)  | 0.00                              | 0.29                            | 0.36                                                       | 0.00                           | 0.29                         | 0.36                                                    | 0.00                           | 0.29                         | 0.36                                                    |
| >0712                                 | Q2YWM5           | SAUR0897 (SAR_RS04485)  | 0.00                              | 1.27                            | 0.32                                                       | 0.32                           | 1.59                         | 0.63                                                    | 0.32                           | 1.59                         | 0.63                                                    |
| >0713                                 | corB             | SAUR0898 (SAR_RS04490)  | 0.00                              | 1.06                            | 0.38                                                       | 0.00                           | 1.06                         | 0.38                                                    | 0.00                           | 1.06                         | 0.38                                                    |
| >0714                                 | npd              | SAUR0899 (SAR_RS04495)  | 0.00                              | >=5.00                          | 0.26                                                       | 0.00                           | >=5.00                       | 0.26                                                    | 0.00                           | >=5.00                       | 0.26                                                    |
| >0715                                 | yusF-yecE        | SAUR0900 (SAR_RS04500)  | 0.00                              | 0.47                            | 0.94                                                       | 0.00                           | 0.47                         | 0.94                                                    | 0.00                           | 0.47                         | 0.94                                                    |
| >0716                                 | yunE             | SAUR0901 (SAR_RS04505)  | 0.00                              | >=5.00                          | 2.29                                                       | 0.00                           | >=5.00                       | 2.29                                                    | 0.00                           | >=5.00                       | 2.29                                                    |
| >0717                                 | yunD             | SAUR0902 (SAR_RS04510)  | 0.00                              | 0.98                            | 0.61                                                       | 0.00                           | 0.98                         | 0.61                                                    | 0.08                           | 1.06                         | 0.68                                                    |
| >0718                                 | lipA             | SAUR0903 (SAR_RS04515)  | 0.00                              | 0.22                            | 0.00                                                       | 0.00                           | 0.22                         | 0.00                                                    | 0.00                           | 0.22                         | 0.00                                                    |
| >0719                                 | utp-yutD=DUF1027 | SAUR0904 (SAR_RS04520)  | 0.25                              | 0.51                            | 0.00                                                       | 0.25                           | 0.51                         | 0.00                                                    | 0.25                           | 0.51                         | 0.00                                                    |
| >0720                                 | DUF3055          | (N/A)                   | 0.00                              | 0.39                            | 1.16                                                       | 0.00                           | 0.39                         | 1.16                                                    | 0.00                           | 0.39                         | 1.16                                                    |
| >0721                                 | utp-yutE=DUF0086 | SAUR2986                | 0.00                              | 0.46                            | 0.46                                                       | 0.00                           | 0.46                         | 0.46                                                    | 0.00                           | 0.46                         | 0.46                                                    |
| >0722                                 | utp-yutF         | SAUR0907 (SAR_RS04535)  | 0.00                              | 1.54                            | 0.26                                                       | 0.00                           | 1.54                         | 0.26                                                    | 0.00                           | 1.54                         | 0.26                                                    |
| >0723                                 | gyrA             | SAUR0908 (SAR_RS04540)  | 0.42                              | 1.67                            | 0.83                                                       | 0.10                           | 1.35                         | 0.52                                                    | 0.10                           | 1.35                         | 0.52                                                    |
| >0724                                 | dtwX             | (N/A)                   | 0.00                              | 0.00                            | 0.00                                                       | 0.00                           | 0.00                         | 0.00                                                    | 0.00                           | 0.00                         | 0.00                                                    |
| >0725                                 | ditA             | SAUR0911 (SAR_RS04555)  | 0.00                              | 0.46                            | 0.34                                                       | 0.00                           | 0.46                         | 0.34                                                    | 0.00                           | 0.46                         | 0.34                                                    |
| >0726                                 | ditB             | SAUR0912 (SAR_RS04560)  | 0.00                              | 0.33                            |                                                            |                                |                              |                                                         |                                |                              |                                                         |

| Number/<br>Position in the<br>figures | Gene ID         | ID in PubMLST cg scheme | ED133 vs. swan<br>isolate 15V8707 | X22 vs. swan isolate<br>15V8707 | CC522 goat isolate<br>17CS1042 vs. swan<br>isolate 15V8707 | ED133 vs. duck<br>isolate V315 | X22 vs. duck isolate<br>V315 | CC522 goat isolate<br>17CS1042 vs. duck<br>isolate V315 | ED133 vs. duck<br>isolate V482 | X22 vs. duck isolate<br>V482 | CC522 goat isolate<br>17CS1042 vs. duck<br>isolate V482 |
|---------------------------------------|-----------------|-------------------------|-----------------------------------|---------------------------------|------------------------------------------------------------|--------------------------------|------------------------------|---------------------------------------------------------|--------------------------------|------------------------------|---------------------------------------------------------|
| >0778                                 | oppF            | SAUR0968 (SAR_RS04840)  | 0.11                              | >=5.00                          | 0.42                                                       | 0.00                           | >=5.00                       | 0.32                                                    | 0.00                           | >=5.00                       | 0.32                                                    |
| >0779                                 | oppA            | SAUR0969 (SAR_RS04845)  | 0.00                              | 2.78                            | 1.63                                                       | 0.00                           | 2.78                         | 1.63                                                    | 0.00                           | 2.78                         | 1.63                                                    |
| >0780                                 | appA            | (N/A)                   | 0.12                              | 1.98                            | 0.12                                                       | 0.12                           | 1.98                         | 0.12                                                    | 0.17                           | 2.04                         | 0.17                                                    |
| >0781                                 | appD            | (N/A)                   | 0.00                              | 1.82                            | 0.61                                                       | 0.10                           | 1.93                         | 0.71                                                    | 0.00                           | 1.82                         | 0.61                                                    |
| >0782                                 | appF            | (N/A)                   | 0.10                              | 3.06                            | 0.10                                                       | 0.00                           | 2.96                         | 0.00                                                    | 0.00                           | 2.96                         | 0.00                                                    |
| >0783                                 | appB            | (N/A)                   | 0.00                              | 3.84                            | 0.10                                                       | 0.10                           | 3.84                         | 0.21                                                    | 0.10                           | 3.84                         | 0.21                                                    |
| >0784                                 | appC            | (N/A)                   | 0.00                              | 0.57                            | 0.34                                                       | 0.11                           | 0.68                         | 0.45                                                    | 0.00                           | 0.57                         | 0.34                                                    |
| >0785                                 | trpS            | SAUR0980 (SAR_RS04900)  | 0.00                              | 2.83                            | 0.40                                                       | 0.10                           | 2.93                         | 0.51                                                    | 0.10                           | 2.93                         | 0.51                                                    |
| >0786                                 | spxA            | SAUR0981 (SAR_RS04905)  | 0.00                              | 0.00                            | 0.00                                                       | 0.00                           | 0.00                         | 0.00                                                    | 0.00                           | 0.00                         | 0.00                                                    |
| >0787                                 | trfA            | SAUR0982 (SAR_RS04910)  | 0.00                              | 0.83                            | 0.14                                                       | 0.00                           | 0.83                         | 0.14                                                    | 0.00                           | 0.83                         | 0.14                                                    |
| >0788                                 | trb             | SAUR0983 (SAR_RS04915)  | 0.00                              | 1.62                            | 0.41                                                       | 0.00                           | 1.62                         | 0.13                                                    | 0.00                           | 1.62                         | 0.41                                                    |
| >0789                                 | pepF1           | SAUR0984 (SAR_RS04920)  | 0.00                              | 0.06                            | 0.06                                                       | 0.00                           | 0.06                         | 0.06                                                    | 0.00                           | 0.06                         | 0.06                                                    |
| >0790                                 | yibH            | SAUR0985 (SAR_RS04925)  | 0.12                              | 0.37                            | >=5.00                                                     | 0.00                           | 0.25                         | >=5.00                                                  | 0.00                           | 0.25                         | >=5.00                                                  |
| >0791                                 | yibI            | SAUR0986 (SAR_RS04930)  | 0.00                              | 0.55                            | 0.55                                                       | >=5.00                         | >=5.00                       | >=5.00                                                  | >=5.00                         | >=5.00                       | >=5.00                                                  |
| >0792                                 | yibK            | SAUR0987 (SAR_RS04935)  | 0.17                              | 1.52                            | 0.84                                                       | 0.00                           | 1.35                         | 0.67                                                    | 0.00                           | 1.35                         | 0.67                                                    |
| >0793                                 | yibL            | SAUR0988 (SAR_RS04940)  | 0.29                              | 0.86                            | 0.86                                                       | 0.00                           | 0.57                         | 0.57                                                    | 0.00                           | 0.57                         | 0.57                                                    |
| >0794                                 | relQ            | SAUR0989 (SAR_RS04945)  | 0.00                              | 0.31                            | 0.16                                                       | 0.10                           | 0.31                         | 0.16                                                    | 0.00                           | 0.31                         | 0.16                                                    |
| >0795                                 | ppnK            | SAUR0990 (SAR_RS04950)  | 0.12                              | 0.25                            | 0.12                                                       | 0.00                           | 0.12                         | 0.00                                                    | 0.00                           | 0.12                         | 0.00                                                    |
| >0796                                 | rue             | SAUR0991 (SAR_RS04955)  | 0.12                              | 1.64                            | 0.00                                                       | 0.12                           | 1.64                         | 0.00                                                    | 0.12                           | 1.64                         | 0.00                                                    |
| >0797                                 | mgfE            | SAUR0992 (SAR_RS04960)  | 0.00                              | 1.44                            | 0.22                                                       | 0.07                           | 1.52                         | 0.29                                                    | 0.07                           | 1.52                         | 0.29                                                    |
| >0798                                 | cpaA            | SAUR0993 (SAR_RS04965)  | 0.00                              | 0.43                            | 0.22                                                       | 0.00                           | 0.43                         | 0.22                                                    | 0.00                           | 0.43                         | 0.22                                                    |
| >0799                                 | fabi            | (N/A)                   | 0.00                              | 0.91                            | 0.78                                                       | 0.00                           | 0.91                         | 0.78                                                    | 0.00                           | 0.91                         | 0.78                                                    |
| >0800                                 | UFF0118=cozEa   | (N/A)                   | 0.09                              | 0.28                            | 0.64                                                       | 0.18                           | 0.37                         | 0.74                                                    | 0.18                           | 0.37                         | 0.74                                                    |
| >0801                                 | yrbD            | SAUR0996 (SAR_RS04980)  | 0.06                              | 1.15                            | 0.96                                                       | 0.00                           | 1.08                         | 0.89                                                    | 0.00                           | 1.08                         | 0.89                                                    |
| >0802                                 | yrcI            | SAUR0997 (SAR_RS04985)  | 0.00                              | 1.98                            | 0.13                                                       | 0.00                           | 1.98                         | 0.13                                                    | 0.00                           | 1.98                         | 0.13                                                    |
| >0803                                 | UFF0477         | SAUR1000 (SAR_RS05000)  | 0.00                              | 0.00                            | 0.00                                                       | 0.00                           | 0.20                         | 0.20                                                    | 0.00                           | 0.20                         | 0.00                                                    |
| >0804                                 | ItaA            | SAUR1001 (SAR_RS05005)  | 0.00                              | 0.92                            | 0.67                                                       | 0.00                           | 0.92                         | 0.67                                                    | 0.00                           | 0.92                         | 0.67                                                    |
| >0805                                 | ugtP            | SAUR1002 (SAR_RS05010)  | 0.00                              | 0.68                            | 0.60                                                       | 0.00                           | 0.68                         | 0.60                                                    | 0.00                           | 0.68                         | 0.60                                                    |
| >0806                                 | murE            | SAUR1003 (SAR_RS05015)  | 0.00                              | 0.81                            | 0.47                                                       | 0.07                           | 0.88                         | 0.54                                                    | 0.00                           | 0.81                         | 0.47                                                    |
| >0807                                 | yueH            | SAUR1004 (SAR_RS05020)  | 0.00                              | 2.38                            | 1.59                                                       | 0.00                           | 2.38                         | 1.59                                                    | 0.00                           | 2.38                         | 1.59                                                    |
| >0808                                 | priC            | SAUR1005 (SAR_RS05025)  | 0.00                              | 0.70                            | 0.83                                                       | 0.00                           | 0.70                         | 0.83                                                    | 0.00                           | 0.70                         | 0.83                                                    |
| >0809                                 | trcC            | SAUR1006 (SAR_RS05030)  | 0.00                              | 0.62                            | 0.50                                                       | 0.00                           | 0.62                         | 0.50                                                    | 0.00                           | 0.62                         | 0.50                                                    |
| >0810                                 | htrAdegP        | SAUR1007 (SAR_RS05035)  | 0.39                              | 1.39                            | 1.26                                                       | 0.13                           | 1.39                         | 1.13                                                    | 0.13                           | 1.39                         | 1.39                                                    |
| >0811                                 | ktxD=trkH       | SAUR1008 (SAR_RS05040)  | 0.00                              | 0.59                            | 0.59                                                       | 0.07                           | 0.66                         | 0.66                                                    | 0.07                           | 0.66                         | 0.66                                                    |
| >0812                                 | Q1KY52=yfkN3    | SAUR1009 (SAR_RS05045)  | 0.00                              | 0.86                            | 0.13                                                       | 0.00                           | 0.86                         | 0.13                                                    | 0.00                           | 0.86                         | 0.13                                                    |
| >0813                                 | comK            | SAUR1012 (SAR_RS05060)  | 0.00                              | 0.53                            | 0.18                                                       | 0.00                           | 0.53                         | 0.18                                                    | 0.00                           | 0.53                         | 0.18                                                    |
| >0814                                 | Q6GI58          | SAUR1013 (SAR_RS05065)  | 0.00                              | 0.44                            | 0.44                                                       | 0.00                           | 0.44                         | 0.44                                                    | 0.00                           | 0.44                         | 0.44                                                    |
| >0815                                 | ipkA2           | SAUR1014 (SAR_RS05070)  | 0.00                              | 1.22                            | 1.01                                                       | 0.00                           | 1.22                         | 1.01                                                    | 0.00                           | 1.22                         | 1.01                                                    |
| >0816                                 | Q6QI65          | (N/A)                   | 0.00                              | 0.00                            | 0.00                                                       | 0.00                           | 0.56                         | 0.56                                                    | 0.00                           | 0.56                         | 0.56                                                    |
| >0817                                 | Q5HH56          | SAUR1016 (SAR_RS05080)  | 0.00                              | 0.50                            | 0.33                                                       | 0.00                           | 0.50                         | 0.33                                                    | 0.00                           | 0.50                         | 0.33                                                    |
| >0818                                 | txpA-var1       | (N/A)                   | 0.00                              | 0.93                            | >=5.00                                                     | 0.00                           | 0.93                         | >=5.00                                                  | 0.00                           | 0.93                         | >=5.00                                                  |
| >0819                                 | Q7A194          | (N/A)                   | 0.00                              | >=5.00                          | >=5.00                                                     | 0.00                           | >=5.00                       | 0.00                                                    | 0.00                           | >=5.00                       | 0.00                                                    |
| >0820                                 | yujE=DUF1430    | SAUR1019 (SAR_RS05095)  | 0.00                              | 1.42                            | 0.61                                                       | 0.00                           | 1.42                         | 0.61                                                    | 0.00                           | 1.42                         | 0.61                                                    |
| >0821                                 | yxeA            | SAUR1020 (SAR_RS05100)  | 0.00                              | 1.25                            | 0.93                                                       | 0.00                           | 1.25                         | 0.93                                                    | 0.00                           | 1.25                         | 0.93                                                    |
| >0822                                 | yujJ            | SAUR1021 (SAR_RS05105)  | 0.00                              | 1.25                            | 0.00                                                       | 0.00                           | 1.25                         | 0.00                                                    | 0.00                           | 1.25                         | 0.00                                                    |
| >0823                                 | Q6QI49          | SAUR1022 (SAR_RS05110)  | 0.00                              | 0.34                            | 0.00                                                       | 0.00                           | 0.69                         | 0.34                                                    | 0.00                           | 0.69                         | 0.34                                                    |
| >0824                                 | Q6QI46          | SAUR1026 (SAR_RS05130)  | 0.00                              | 0.84                            | 0.00                                                       | 0.00                           | 0.84                         | 0.00                                                    | 0.00                           | 0.84                         | 0.00                                                    |
| >0825                                 | Q5HH47          | SAUR1027 (SAR_RS05135)  | 0.00                              | >=5.00                          | 0.73                                                       | 0.00                           | >=5.00                       | 0.73                                                    | 0.00                           | >=5.00                       | 0.73                                                    |
| >0826                                 | shpA            | SAUR1028 (SAR_RS05140)  | 0.00                              | 0.85                            | 0.85                                                       | 0.00                           | 0.85                         | 0.85                                                    | 0.00                           | 0.85                         | 0.85                                                    |
| >0827                                 | Q7A191-(291 bp) | SAUR1029 (SAR_RS05145)  | 0.00                              | 0.34                            | 0.00                                                       | 0.00                           | 0.34                         | 0.00                                                    | 0.00                           | 0.34                         | 0.00                                                    |
| >0828                                 | Q6GAH2          | SAUR1030 (SAR_RS05150)  | 0.00                              | 1.09                            | 0.91                                                       | 0.18                           | 1.27                         | 1.09                                                    | 0.18                           | 1.27                         | 1.09                                                    |
| >0829                                 | menA            | SAUR1031 (SAR_RS05155)  | 0.00                              | 1.64                            | 0.85                                                       | 0.00                           | 0.64                         | 0.85                                                    | 0.00                           | 0.64                         | 0.85                                                    |
| >0830                                 | menF            | SAUR1032 (SAR_RS05160)  | 0.00                              | 0.25                            | 0.22                                                       | 0.00                           | 1.25                         | 0.22                                                    | 0.00                           | 1.25                         | 0.22                                                    |
| >0831                                 | menD            | SAUR1033 (SAR_RS05165)  | 0.00                              | 2.27                            | 1.18                                                       | 0.00                           | 2.27                         | 1.18                                                    | 0.00                           | 2.27                         | 1.18                                                    |
| >0832                                 | menH            | SAUR1034 (SAR_RS05170)  | 0.00                              | 0.87                            | 0.75                                                       | 0.00                           | 0.87                         | 0.75                                                    | 0.12                           | 0.75                         | 0.87                                                    |
| >0833                                 | menB            | SAUR1035 (SAR_RS05175)  | 0.00                              | 0.36                            | 0.73                                                       | 0.00                           | 0.36                         | 0.73                                                    | 0.00                           | 0.36                         | 0.73                                                    |
| >0834                                 | sspC            | SAUR1036 (SAR_RS05180)  | 0.00                              | 0.91                            | 0.61                                                       | 0.00                           | 0.91                         | 0.61                                                    | 0.00                           | 0.91                         | 0.61                                                    |
| >0835                                 | sspB            | SAUR1037 (SAR_RS05185)  | 0.08                              | 1.35                            | 1.95                                                       | 0.00                           | 1.27                         | 1.86                                                    | 0.00                           | 1.27                         | 1.86                                                    |
| >0836                                 | sspA            | SAUR1038 (SAR_RS05190)  | 0.29                              | >=5.00                          | 0.87                                                       | 0.10                           | >=5.00                       | 0.67                                                    | 0.00                           | >=5.00                       | 0.58                                                    |
| >0837                                 | spcC            | SAUR1040 (SAR_RS05200)  | 0.00                              | 1.21                            | 1.04                                                       | 0.00                           | 1.21                         | 1.04                                                    | 0.00                           | 1.21                         | 1.04                                                    |
| >0838                                 | ykrP            | SAUR1041 (SAR_RS05205)  | 0.00                              | 0.69                            | 0.59                                                       | 0.00                           | 0.69                         | 0.59                                                    | 0.20                           | 0.69                         | 0.79                                                    |
| >0839                                 | Q5HH32          | SAUR1042 (SAR_RS05210)  | 0.00                              | 0.48                            | 0.00                                                       | 0.00                           | 0.48                         | 0.00                                                    | 0.00                           | 0.48                         | 0.00                                                    |
| >0840                                 | atl             | SAUR1906 (SAR_RS05305)  | 0.05                              | 1.79                            | 1.39                                                       | 0.03                           | 1.76                         | 1.37                                                    | 0.03                           | 1.76                         | 1.37                                                    |
| >0841                                 | UFF0039         | SAUR1045 (SAR_RS05225)  | 0.00                              | 1.61                            | 0.92                                                       | 0.00                           | 1.61                         | 0.92                                                    | 0.00                           | 1.61                         | 0.92                                                    |
| >0842                                 | Q5HH29=DUF2538  | SAUR1046 (SAR_RS05230)  | 0.00                              | 2.76                            | 0.42                                                       | 0.00                           | 2.76                         | 0.42                                                    | 0.00                           | 2.76                         | 0.42                                                    |
| >0843                                 | tagY=lcgB=ywfF  | SAUR1047 (SAR_RS05235)  | 0.00                              | >=5.00                          | 0.48                                                       | 0.00                           | >=5.00                       | 0.48                                                    | 0.00                           | >=5.00                       | 0.48                                                    |
| >0844                                 | fmfA            | SAUR1048 (SAR_RS05240)  | 0.48                              | 4.48                            | 1.42                                                       | 0.00                           | 4.48                         | 1.34                                                    | 0.00                           | 4.48                         | 1.34                                                    |
| >0845                                 | qxoD            | SAUR1049 (SAR_RS05245)  | 0.00                              | 0.00                            | 0.00                                                       | 0.00                           | 0.00                         | 0.00                                                    | 0.00                           | 0.00                         | 0.00                                                    |
| >0846                                 | qxoC            | SAUR1050 (SAR_RS05250)  | 0.00                              | 0.33                            | 0.00                                                       | 0.00                           | 0.33                         | 0.00                                                    | 0.00                           | 0.33                         | 0.00                                                    |
| >0847                                 | qxoB            | SAUR1051 (SAR_RS05255)  | 0.05                              | 0.25                            | 0.10                                                       | 0.00                           | 0.20                         | 0.05                                                    | 0.00                           | 0.20                         | 0.05                                                    |
| >0848                                 | qxoA            | SAUR1052 (SAR_RS05260)  | 0.00                              | 0.27                            | 0.36                                                       | 0.00                           | 0.27                         | 0.36                                                    | 0.00                           | 0.27                         | 0.36                                                    |
| >0849                                 | iraE            | (N/A)                   | 0.00                              | 0.00                            | 0.31                                                       | 0.00                           | 0.00                         | 0.31                                                    | 0.00                           | 0.00                         | 0.31                                                    |
| >0850                                 | fold            | SAUR1056 (SAR_RS05280)  | 0.00                              | 1.63                            | 0.93                                                       | 0.00                           | 1.63                         | 0.93                                                    | 0.12                           | 1.74                         | 1.05                                                    |
| >0851                                 | purE            | SAUR1057 (SAR_RS05285)  | 0.00                              | 1.04                            | 0.00                                                       | 0.00                           | 1.04                         | 1.86                                                    | 0.00                           | 1.04                         | 1.86                                                    |
| >0852                                 | purK            | SAUR1058 (SAR_RS05290)  | 0.00                              | >=5.00                          | >=5.00                                                     | 0.00                           | >=5.00                       | >=5.00                                                  | 0.00                           | >=5.00                       | >=5.00                                                  |
| >0853                                 | purC            | SAUR1059 (SAR_RS05295)  | 0.00                              | 4.26                            | 0.57                                                       | 0.00                           | 4.26                         | 0.57                                                    | 0.00                           | 4.26                         | 0.57                                                    |
| >0854                                 | purS=yxeA       | SAUR1060 (SAR_RS05300)  | 0.00                              | 0.38                            | 0.00                                                       | 0.00                           | 0.38                         | 0.00                                                    | 0.00                           | 0.38                         | 0.00                                                    |
| >0855                                 | purQ            | SAUR1061 (SAR_RS05305)  | 0.00                              | 2.07                            | 0.59                                                       | 0.00                           | 2.07                         | 0.59                                                    | 0.00                           | 2.07                         | 0.59                                                    |
| >0856                                 | purL            | SAUR1062 (SAR_RS05310)  | 0.05                              | 1.05                            | 0.59                                                       | 0.00                           | 1.00                         | 0.55                                                    | 0.05                           | 1.05                         | 0.59                                                    |
| >0857                                 | purF            | SAUR1063 (SAR_RS05315)  | 0.00                              | 1.21                            | 0.88                                                       | 0.00                           | 1.21                         | 0.88                                                    | 0.00                           | 1.21                         | 0.88                                                    |
| >0858                                 | purG            | SAUR1064 (SAR_RS05320)  | 0.10                              | 1.65                            | 0.87                                                       | 0.10                           | 1.65                         | 0.87                                                    | 0.10                           | 1.65                         | 0.87                                                    |
| >0859                                 | purN            | SAUR1065 (SAR_RS05325)  | 0.00                              | 0.88                            | 0.18                                                       | 0.00                           | 0.88                         | 0.18                                                    | 0.00                           | 0.88                         | 0.18                                                    |
| >0860                                 | purH            | SAUR1066 (SAR_RS05330)  | 0.00                              | 0.61                            | 0.20                                                       | 0.00                           | 0.61                         | 0.20                                                    | 0.00                           | 0.61                         | 0.20                                                    |
| >0861                                 | purD            | SAUR1067 (SAR_RS05335)  | 0.16                              | 0.80                            | 0.48                                                       | 0.16                           | 0.80                         | 0.48                                                    | 0.24                           | 0.80                         | 0.56                                                    |
| >0862                                 | ykoC            | SAUR1068 (SAR_RS05340)  | 0.00                              | 1.36                            | 0.12                                                       | 0.00                           | 1.36                         | 0.12                                                    | 0.00                           | 1.36                         | 0.12                                                    |
| >0863                                 | ykoD            | SAUR1069 (SAR_RS05345)  | 0.07                              | 1.00                            | 0.64                                                       | 0.00                           | 0.93                         | 0.57                                                    | 0.00                           | 0.93                         | 0.57                                                    |
| >0864                                 | ykoE            | SAUR1070 (SAR_RS05350)  | 0.00                              | 1.04                            | 0.17                                                       | 0.00                           | 1.04                         | 0.17                                                    | 0.17                           | 1.22                         | 0.35                                                    |
| >0865                                 | grf             | SAUR1072 (SAR_RS05360)  | 0.00                              | 0.74                            | 0.00                                                       | 0.00                           | 0.74                         | 0.00                                                    | 0.00                           | 0.74                         | 0.00                                                    |
| >0866                                 | Q5HH05          | SAUR1073 (SAR_RS05365)  | 0.00                              | 0.46                            | 0.31                                                       | 0.00                           | 0.46                         | 0.31                                                    | 0.00                           | 0.46                         | 0.31                                                    |
| >0867                                 | ywbD            | SAUR1074 (SAR_RS05370)  | 0.00                              | 1.11                            | 0.09                                                       | 0.00                           | 1.11                         | 0.09                                                    | 0.00                           | 1.11                         | 0.09                                                    |
| >0868                                 | Q5HH03=DUF0697  | SAUR1075 (SAR_RS05375)  | 0.00                              | >=5.00                          | 0.92                                                       | 0.00                           | >=5.00                       | 0.92                                                    | 0.00                           | >=5.00                       | 0.92                                                    |
| >0869                                 | ptsh            | SAUR1076 (SAR_RS05380)  | 0.00                              | 0.37                            | 0.00                                                       | 0.00                           | 0.37                         | 0.00                                                    | 0.00                           | 0.37                         | 0.00                                                    |
| >0870                                 | ptsl=ptslP      | SAUR1077 (SAR_RS05385)  | 0.00                              | 0.70                            | 0.47                                                       | 0.00                           | 0.70                         | 0.47                                                    | 0.00                           | 0.70                         | 0.47                                                    |
| >0871                                 | rrdH            | SAUR1078 (SAR_RS05390)  | 0.00                              | 0.85                            | 1.28                                                       | 0.00                           | 0.85                         | 1.28                                                    | 0.00                           | 0.85                         | 1.28                                                    |
| >0872                                 | cydA            | SAUR1079 (SAR_RS05395)  | 0.15                              | 0.66                            | 0.73                                                       | 0.15                           | 0.66                         | 0.73                                                    | 0.15                           | 0.66                         | 0.73                                                    |
| >0873                                 | cydB            | SAUR1080 (SAR_RS05400)  | 0.00                              | 0.88                            | 0.69                                                       | 0.00                           | 0.88                         | 0.69                                                    | 0.00                           | 0.88                         | 0.69                                                    |
| >0874                                 | ktrA            | SAUR1081 (SAR_RS05405)  | 0.15                              | 0.45                            | 0.45                                                       | 0.15                           | 0.45                         | 0.45                                                    | 0.15                           | 0.45                         | 0.45                                                    |
| >0875                                 | rmjA            | SAUR1083 (SAR_RS05415)  | 0.00                              | 0.59                            | 0.12                                                       | 0.00                           |                              |                                                         |                                |                              |                                                         |

| Number/<br>Position in the<br>figures | Gene ID                | ID in PubMLST cg scheme | ED133 vs. swan<br>isolate 15V8707 | X22 vs. swan isolate<br>15V8707 | CC522 goat isolate<br>17C51042 vs. swan<br>isolate 15V8707 | ED133 vs. duck<br>isolate V315 | X22 vs. duck isolate<br>V315 | CC522 goat isolate<br>17C51042 vs. duck<br>isolate V315 | ED133 vs. duck<br>isolate V482 | X22 vs. duck isolate<br>V482 | CC522 goat isolate<br>17C51042 vs. duck<br>isolate V482 |
|---------------------------------------|------------------------|-------------------------|-----------------------------------|---------------------------------|------------------------------------------------------------|--------------------------------|------------------------------|---------------------------------------------------------|--------------------------------|------------------------------|---------------------------------------------------------|
| >0926                                 | poIX                   | SAUR1140 (SAR_RS05700)  | 0.00                              | 0.70                            | 0.76                                                       | 0.00                           | 0.70                         | 0.76                                                    | 0.00                           | 0.70                         | 0.76                                                    |
| >0927                                 | mutS2                  | SAUR1141 (SAR_RS05705)  | 0.09                              | 0.81                            | 0.60                                                       | 0.00                           | 0.81                         | 0.60                                                    | 0.00                           | 0.81                         | 0.60                                                    |
| >0928                                 | traA1                  | SAUR1142 (SAR_RS05710)  | 0.00                              | 0.43                            | 0.00                                                       | 0.00                           | 0.63                         | 0.00                                                    | 0.00                           | 0.63                         | 0.00                                                    |
| >0929                                 | uvrC                   | SAUR1144 (SAR_RS05720)  | 0.11                              | 2.08                            | 0.79                                                       | 0.00                           | 1.96                         | 0.79                                                    | 0.06                           | 1.96                         | 0.73                                                    |
| >0930                                 | sdhC                   | SAUR1145 (SAR_RS05725)  | 0.00                              | 0.49                            | 0.33                                                       | 0.33                           | 0.81                         | 0.65                                                    | 0.16                           | 0.65                         | 0.49                                                    |
| >0931                                 | sdhA                   | SAUR1146 (SAR_RS05730)  | 0.00                              | 0.45                            | 0.40                                                       | 0.00                           | 0.45                         | 0.40                                                    | 0.00                           | 0.45                         | 0.40                                                    |
| >0932                                 | sdhB                   | SAUR1147 (SAR_RS05735)  | 0.25                              | 1.23                            | 1.59                                                       | 0.12                           | 1.10                         | 1.47                                                    | 0.12                           | 1.10                         | 1.47                                                    |
| >0933                                 | muri1                  | SAUR1148 (SAR_RS05740)  | 0.00                              | 1.12                            | 0.12                                                       | 0.00                           | 1.12                         | 0.12                                                    | 0.12                           | 1.25                         | 0.25                                                    |
| >0934                                 | ntpA                   | SAUR1149 (SAR_RS05745)  | 0.00                              | 0.85                            | 0.85                                                       | 0.00                           | 0.85                         | 0.85                                                    | 0.00                           | 0.85                         | 0.85                                                    |
| >0935                                 | ynfB                   | SAUR1150 (SAR_RS05750)  | 0.00                              | 0.79                            | 0.60                                                       | 0.00                           | 0.79                         | 0.60                                                    | 0.00                           | 0.79                         | 0.60                                                    |
| >0936                                 | ecb                    | SAUR1152 (SAR_RS05760)  | 0.00                              | 1.64                            | >=5.00                                                     | 0.00                           | 1.64                         | >=5.00                                                  | 0.00                           | 1.64                         | >=5.00                                                  |
| >0937                                 | flr                    | (N/A)                   | 0.25                              | >=5.00                          | >=5.00                                                     | >=5.00                         | >=5.00                       | >=5.00                                                  | 0.00                           | >=5.00                       | >=5.00                                                  |
| >0938                                 | QZYXB9                 | SAUR1155 (SAR_RS05775)  | 0.00                              | 0.39                            | 1.18                                                       | 0.00                           | 0.39                         | 1.18                                                    | 0.00                           | 0.39                         | 1.18                                                    |
| >0939                                 | efb- <i>flb</i>        | SAUR1156 (SAR_RS05780)  | 0.00                              | 2.01                            | 1.61                                                       | 0.00                           | 2.01                         | 1.61                                                    | 0.00                           | 2.01                         | 1.61                                                    |
| >0940                                 | scs                    | SAUR1157 (SAR_RS05785)  | 0.00                              | >=5.00                          | 0.28                                                       | 0.00                           | >=5.00                       | 0.28                                                    | 0.00                           | >=5.00                       | 0.28                                                    |
| >0941                                 | AS1545                 | SAUR1158 (SAR_RS05790)  | 0.00                              | 1.07                            | 1.07                                                       | >=5.00                         | >=5.00                       | >=5.00                                                  | 0.00                           | 1.07                         | 1.07                                                    |
| >0942                                 | Q6GH55                 | (N/A)                   | 0.00                              | >=5.00                          | 0.40                                                       | 0.40                           | >=5.00                       | 0.80                                                    | 0.00                           | >=5.00                       | 0.40                                                    |
| >0943                                 | AS1547                 | 0                       | 0.00                              | 0.65                            | 0.85                                                       | 0.00                           | 0.65                         | 0.85                                                    | 0.00                           | 0.65                         | 0.85                                                    |
| >0944                                 | hla                    | SAUR1161 (SAR_RS05805)  | 0.00                              | 0.63                            | 0.42                                                       | 0.00                           | 0.63                         | 0.42                                                    | 0.00                           | 0.63                         | 0.42                                                    |
| >0945                                 | AGU0Y3                 | SAUR1162 (SAR_RS05810)  | 0.00                              | 1.36                            | 0.68                                                       | 0.00                           | 1.36                         | 0.68                                                    | 0.00                           | 1.36                         | 0.68                                                    |
| >0946                                 | QZF2B4                 | SAUR1163 (SAR_RS05815)  | 0.00                              | 0.51                            | 0.51                                                       | 0.00                           | 0.51                         | 0.51                                                    | 0.00                           | 0.51                         | 0.51                                                    |
| >0947                                 | setB3                  | SAUR1165 (SAR_RS05825)  | 0.00                              | 1.12                            | 0.56                                                       | 0.00                           | 1.12                         | 0.56                                                    | 0.00                           | 1.12                         | 0.56                                                    |
| >0948                                 | setB2                  | SAUR1166 (SAR_RS05830)  | 0.00                              | 1.79                            | >=5.00                                                     | 0.00                           | 1.79                         | >=5.00                                                  | 0.00                           | 1.79                         | >=5.00                                                  |
| >0949                                 | setB1                  | SAUR1167 (SAR_RS05835)  | 0.00                              | 1.24                            | 0.96                                                       | 0.00                           | 1.24                         | 0.96                                                    | 0.00                           | 1.24                         | 0.96                                                    |
| >0950                                 | arcD-L1                | SAUR1168 (SAR_RS05840)  | 0.00                              | 1.40                            | >=5.00                                                     | 0.00                           | 1.40                         | >=5.00                                                  | 0.00                           | 1.40                         | >=5.00                                                  |
| >0951                                 | arcC-L1                | SAUR1169 (SAR_RS05845)  | >=5.00                            | >=5.00                          | 0.00                                                       | 0.32                           | 0.43                         | 0.00                                                    | 0.32                           | 0.43                         | 0.00                                                    |
| >0952                                 | arcD-L1                | SAUR1170 (SAR_RS05850)  | 0.00                              | 1.03                            | 0.64                                                       | 0.00                           | 1.03                         | 0.64                                                    | 0.00                           | 1.03                         | 0.64                                                    |
| >0953                                 | AS1557                 | SAUR1171 (SAR_RS05855)  | 0.00                              | 1.75                            | 1.75                                                       | 0.00                           | 1.75                         | 1.75                                                    | 0.00                           | 1.75                         | 1.75                                                    |
| >0954                                 | per                    | SAUR1172 (SAR_RS05860)  | 0.00                              | 1.69                            | 0.63                                                       | 0.00                           | 1.69                         | 0.63                                                    | 0.00                           | 1.69                         | 0.63                                                    |
| >0955                                 | psmB1                  | SAUR1175 (psmB1)        | 0.00                              | 1.48                            | 0.74                                                       | 0.00                           | 1.48                         | 0.74                                                    | 0.00                           | 1.48                         | 0.74                                                    |
| >0956                                 | Q172B3- <i>ynfB</i>    | SAUR1176 (SAR_RS05880)  | 0.29                              | 1.15                            | 0.57                                                       | 0.43                           | 1.29                         | 0.72                                                    | 0.43                           | 1.29                         | 0.72                                                    |
| >0957                                 | Q91172                 | SAUR1177 (SAR_RS05885)  | 0.23                              | 0.00                            | 0.45                                                       | 0.00                           | 0.45                         | 0.00                                                    | 0.23                           | 0.45                         | 0.00                                                    |
| >0958                                 | bshC                   | SAUR1178 (SAR_RS05890)  | 0.00                              | 0.68                            | 0.50                                                       | 0.00                           | 0.68                         | 0.50                                                    | 0.12                           | 0.68                         | 0.74                                                    |
| >0959                                 | mraZ                   | SAUR1179 (SAR_RS05895)  | 0.00                              | >=5.00                          | 0.23                                                       | 0.00                           | >=5.00                       | 0.23                                                    | 0.00                           | >=5.00                       | 0.23                                                    |
| >0960                                 | mraW- <i>rsrM</i> H    | (N/A)                   | 0.00                              | 0.43                            | 2.46                                                       | 0.00                           | 0.43                         | 2.46                                                    | 0.00                           | 0.43                         | 2.46                                                    |
| >0961                                 | ftsI                   | (N/A)                   | 0.00                              | 0.00                            | 0.00                                                       | 0.00                           | 0.00                         | 0.00                                                    | 0.00                           | 0.00                         | 0.00                                                    |
| >0962                                 | pbpA- <i>ftsI</i> 1    | SAUR1182 (SAR_RS05910)  | 0.00                              | 0.54                            | 0.31                                                       | 0.09                           | 0.63                         | 0.40                                                    | 0.09                           | 0.63                         | 0.40                                                    |
| >0963                                 | mraY                   | SAUR1183 (SAR_RS05915)  | 0.00                              | 0.83                            | 0.83                                                       | 0.00                           | 0.83                         | 0.83                                                    | 0.00                           | 0.83                         | 0.83                                                    |
| >0964                                 | murD                   | SAUR1184 (SAR_RS05920)  | 0.00                              | 0.81                            | 0.30                                                       | 0.00                           | 0.81                         | 0.30                                                    | 0.00                           | 0.81                         | 0.30                                                    |
| >0965                                 | ftsQ- <i>divB</i>      | SAUR1185 (SAR_RS05925)  | 0.00                              | 0.76                            | 0.23                                                       | 0.00                           | 0.76                         | 0.23                                                    | 0.00                           | 0.76                         | 0.23                                                    |
| >0966                                 | ftsA                   | SAUR1186 (SAR_RS05930)  | 0.00                              | 0.78                            | 0.14                                                       | 0.00                           | 0.78                         | 0.14                                                    | 0.00                           | 0.78                         | 0.14                                                    |
| >0967                                 | ftsZ                   | SAUR1187 (SAR_RS05935)  | 0.00                              | 0.51                            | 0.00                                                       | 0.00                           | 0.51                         | 0.00                                                    | 0.00                           | 0.51                         | 0.00                                                    |
| >0968                                 | ylmD- <i>pgeF</i>      | SAUR1188 (SAR_RS05940)  | 0.00                              | 0.76                            | 0.51                                                       | 0.00                           | 0.76                         | 0.51                                                    | 0.00                           | 0.76                         | 0.51                                                    |
| >0969                                 | ylmE- <i>yggS</i>      | SAUR1189 (SAR_RS05945)  | 0.00                              | 0.44                            | 0.15                                                       | 0.00                           | 0.44                         | 0.15                                                    | 0.00                           | 0.44                         | 0.15                                                    |
| >0970                                 | sepF                   | SAUR1190 (SAR_RS05950)  | 0.00                              | 0.00                            | 0.18                                                       | 0.00                           | 0.00                         | 0.18                                                    | 0.00                           | 0.00                         | 0.18                                                    |
| >0971                                 | ylmG                   | SAUR1191 (SAR_RS05955)  | 0.00                              | 0.69                            | 0.00                                                       | 0.00                           | 1.03                         | 0.69                                                    | 0.00                           | 1.03                         | 0.69                                                    |
| >0972                                 | ylmH                   | SAUR1192 (SAR_RS05960)  | 0.00                              | 0.74                            | 0.37                                                       | 0.12                           | 0.87                         | 0.59                                                    | 0.00                           | 0.74                         | 0.37                                                    |
| >0973                                 | divIVA                 | SAUR1193 (SAR_RS05965)  | 0.00                              | 0.49                            | 0.81                                                       | >=5.00                         | >=5.00                       | >=5.00                                                  | >=5.00                         | >=5.00                       | >=5.00                                                  |
| >0974                                 | ileS                   | SAUR1194 (SAR_RS05970)  | 0.00                              | 0.73                            | 0.69                                                       | 0.07                           | 0.80                         | 0.70                                                    | 0.07                           | 0.80                         | 0.76                                                    |
| >0975                                 | PF00903- <i>catE</i>   | SAUR1196 (SAR_RS05980)  | 0.00                              | 0.75                            | 0.38                                                       | 0.00                           | 0.75                         | 0.38                                                    | 0.13                           | 0.88                         | 0.50                                                    |
| >0976                                 | lspA                   | SAUR1197 (SAR_RS05985)  | 0.20                              | 0.41                            | 0.00                                                       | 0.20                           | 0.41                         | 0.00                                                    | 0.20                           | 0.41                         | 0.00                                                    |
| >0977                                 | ylfB                   | SAUR1198 (SAR_RS05990)  | 0.00                              | 1.76                            | 0.22                                                       | 0.00                           | 1.76                         | 0.22                                                    | 0.00                           | 1.76                         | 0.22                                                    |
| >0978                                 | pyrR                   | SAUR1199 (SAR_RS05995)  | 0.19                              | 0.00                            | 0.38                                                       | 0.19                           | 0.38                         | 0.38                                                    | 0.19                           | 0.38                         | 0.38                                                    |
| >0979                                 | pyrP                   | SAUR1200 (SAR_RS06000)  | 0.07                              | 1.07                            | 0.61                                                       | 0.07                           | 1.07                         | 0.61                                                    | >=5.00                         | >=5.00                       | >=5.00                                                  |
| >0980                                 | pyrB                   | SAUR1201 (SAR_RS06005)  | 0.23                              | 0.45                            | 0.23                                                       | 0.11                           | 0.34                         | 0.11                                                    | 0.23                           | 0.45                         | 0.23                                                    |
| >0981                                 | pyrC                   | SAUR1202 (SAR_RS06010)  | 0.00                              | 0.55                            | 0.55                                                       | 0.00                           | 0.55                         | 0.55                                                    | 0.00                           | 0.55                         | 0.55                                                    |
| >0982                                 | pyrAA                  | SAUR1203 (SAR_RS06015)  | 0.09                              | 0.18                            | 0.27                                                       | 0.09                           | 0.18                         | 0.27                                                    | 0.18                           | 0.27                         | 0.36                                                    |
| >0983                                 | pyrAB                  | SAUR1204 (SAR_RS06020)  | 0.00                              | 0.82                            | 0.25                                                       | 0.00                           | 0.82                         | 0.25                                                    | 0.00                           | 0.82                         | 0.25                                                    |
| >0984                                 | pyrF                   | SAUR1205 (SAR_RS06025)  | 0.00                              | 1.44                            | 0.58                                                       | 0.00                           | 1.44                         | 0.58                                                    | 0.00                           | 1.44                         | 0.58                                                    |
| >0985                                 | pyrE                   | SAUR1206 (SAR_RS06030)  | 0.00                              | 0.49                            | >=5.00                                                     | 0.00                           | 0.49                         | >=5.00                                                  | 0.00                           | 0.49                         | >=5.00                                                  |
| >0986                                 | QSHGM6                 | SAUR1207 (SAR_RS06035)  | 0.00                              | 0.47                            | 0.47                                                       | 0.00                           | 0.47                         | 0.47                                                    | 0.00                           | 0.47                         | 0.47                                                    |
| >0987                                 | QSHGM5                 | SAUR1208 (SAR_RS06040)  | 0.00                              | 1.49                            | 0.25                                                       | 0.00                           | 1.49                         | 0.25                                                    | 0.00                           | 1.49                         | 0.25                                                    |
| >0988                                 | lfpA                   | SAUR1209 (SAR_RS06045)  | 0.06                              | 1.18                            | 0.59                                                       | 0.06                           | 1.18                         | 0.59                                                    | 0.06                           | 1.18                         | 0.59                                                    |
| >0989                                 | gmK                    | SAUR1210 (SAR_RS06050)  | 0.00                              | 1.12                            | 0.32                                                       | 0.00                           | 1.12                         | 0.32                                                    | 0.00                           | 1.12                         | 0.32                                                    |
| >0990                                 | rpoZ                   | SAUR1211 (SAR_RS06055)  | 0.00                              | 0.46                            | 0.00                                                       | 0.00                           | 0.46                         | 0.00                                                    | 0.00                           | 0.46                         | 0.00                                                    |
| >0991                                 | coxB1                  | SAUR1212 (SAR_RS06060)  | 0.00                              | 0.58                            | 0.00                                                       | 0.00                           | 0.58                         | 0.00                                                    | 0.00                           | 0.58                         | 0.00                                                    |
| >0992                                 | prfA                   | SAUR1213 (SAR_RS06065)  | 0.04                              | 0.94                            | 0.54                                                       | 0.04                           | 0.94                         | 0.54                                                    | 0.04                           | 0.94                         | 0.54                                                    |
| >0993                                 | QSHGL9                 | SAUR1214 (SAR_RS06070)  | 0.00                              | 1.85                            | 1.85                                                       | 0.00                           | 1.85                         | >=5.00                                                  | 0.00                           | 1.85                         | >=5.00                                                  |
| >0994                                 | QSHGLB- <i>aynA</i>    | SAUR1215 (SAR_RS06075)  | >=5.00                            | >=5.00                          | >=5.00                                                     | 0.00                           | 3.58                         | 0.36                                                    | 0.00                           | 3.58                         | 0.36                                                    |
| >0995                                 | defA- <i>def2</i>      | SAUR1216 (SAR_RS06080)  | 0.00                              | 0.61                            | 1.23                                                       | 0.00                           | 0.61                         | 1.23                                                    | 0.00                           | 0.61                         | 1.23                                                    |
| >0996                                 | fnt                    | SAUR1217 (SAR_RS06085)  | 0.00                              | 0.85                            | 1.07                                                       | 0.11                           | 0.96                         | 1.18                                                    | 0.00                           | 0.85                         | 1.07                                                    |
| >0997                                 | rsmB- <i>sun</i>       | SAUR1218 (SAR_RS06090)  | 0.00                              | 1.53                            | 0.92                                                       | 0.00                           | 1.53                         | 0.92                                                    | 0.08                           | 1.61                         | 0.99                                                    |
| >0998                                 | rsmN                   | SAUR1219 (SAR_RS06095)  | 0.00                              | 0.37                            | 0.37                                                       | 0.00                           | 0.37                         | 0.37                                                    | 0.00                           | 0.37                         | 0.37                                                    |
| >0999                                 | prpC- <i>cpnB</i>      | SAUR1220 (SAR_RS06100)  | 0.00                              | 0.67                            | 0.00                                                       | 0.13                           | 0.81                         | 0.13                                                    | 0.13                           | 0.81                         | 0.13                                                    |
| >1000                                 | prpC- <i>cpnB</i>      | SAUR1221 (SAR_RS06105)  | 0.30                              | 1.30                            | 0.45                                                       | 0.00                           | 1.35                         | 0.45                                                    | 0.15                           | 1.35                         | 0.45                                                    |
| >1001                                 | cpbA- <i>engC</i> rrgA | SAUR1222 (SAR_RS06110)  | 0.11                              | 1.26                            | 0.46                                                       | 0.23                           | 1.37                         | 0.57                                                    | 0.34                           | 1.48                         | 0.68                                                    |
| >1002                                 | rpe                    | SAUR1223 (SAR_RS06115)  | 0.00                              | 1.09                            | 0.47                                                       | 0.00                           | 0.93                         | 0.31                                                    | 0.00                           | 0.93                         | 0.31                                                    |
| >1003                                 | thiN                   | SAUR1224 (SAR_RS06120)  | 0.00                              | 0.47                            | 0.16                                                       | 0.16                           | 0.62                         | 0.31                                                    | 0.00                           | 0.47                         | 0.16                                                    |
| >1004                                 | rpmB                   | SAUR1225 (SAR_RS06125)  | 0.00                              | 0.00                            | 0.00                                                       | 0.00                           | 0.00                         | 0.00                                                    | 0.00                           | 0.00                         | 0.00                                                    |
| >1005                                 | ylpU                   | SAUR1226 (SAR_RS06130)  | 0.00                              | 0.00                            | 0.00                                                       | 0.00                           | 0.00                         | 0.00                                                    | 0.00                           | 0.00                         | 0.00                                                    |
| >1006                                 | ylpV- <i>fabA</i>      | SAUR1227 (SAR_RS06135)  | 0.06                              | 0.97                            | 0.67                                                       | 0.00                           | 0.91                         | 0.61                                                    | 0.12                           | 1.13                         | 0.73                                                    |
| >1007                                 | recG                   | SAUR1228 (SAR_RS06140)  | 0.05                              | 1.12                            | 0.73                                                       | 0.02                           | 1.12                         | 0.73                                                    | 0.13                           | 1.12                         | 0.73                                                    |
| >1008                                 | lspR                   | SAUR1229 (SAR_RS06145)  | 0.00                              | 0.36                            | 0.54                                                       | 0.00                           | 0.36                         | 0.54                                                    | 0.00                           | 0.36                         | 0.54                                                    |
| >1009                                 | plxX                   | SAUR1230 (SAR_RS06150)  | 0.00                              | 0.71                            | 0.30                                                       | 0.00                           | 0.71                         | 0.30                                                    | 0.10                           | 0.81                         | 0.41                                                    |
| >1010                                 | fabD                   | SAUR1231 (SAR_RS06155)  | 0.00                              | 1.94                            | 0.22                                                       | 0.11                           | 2.05                         | 0.32                                                    | 0.00                           | 1.94                         | 0.22                                                    |
| >1011                                 | fabG1                  | SAUR1232 (SAR_RS06160)  | 0.00                              | 0.54                            | 0.82                                                       | 0.00                           | 0.54                         | 0.82                                                    | 0.14                           | 0.68                         | 0.95                                                    |
| >1012                                 | acpP- <i>hmrB</i>      | (N/A)                   | 0.00                              | 0.00                            | 0.00                                                       | 0.00                           | 0.00                         | 0.00                                                    | 0.00                           | 0.00                         | 0.00                                                    |
| >1013                                 | rnc                    | SAUR1235 (SAR_RS06175)  | 0.00                              | 0.41                            | 0.27                                                       | 0.00                           | 0.41                         | 0.27                                                    | 0.00                           | 0.41                         | 0.27                                                    |
| >1014                                 | rnc                    | SAUR1236 (SAR_RS06180)  | 0.00                              | 1.09                            | 1.15                                                       | 0.00                           | 1.15                         | 0.34                                                    | 0.06                           | 1.15                         | 0.34                                                    |
| >1015                                 | ftsY                   | SAUR1237 (SAR_RS06185)  | 0.00                              | 0.48                            | 0.72                                                       | 0.08                           | 0.56                         | 0.80                                                    | 0.16                           | 0.64                         | 0.88                                                    |
| >1016                                 | ylxM                   | SAUR1238 (SAR_RS06190)  | 0.00                              | 1.20                            | 0.90                                                       | 0.00                           | 1.20                         | 0.90                                                    | 0.00                           | 1.20                         | 0.90                                                    |
| >1017                                 | flh                    | SAUR1239 (SAR_RS06195)  | 0.07                              | 0.88                            | 0.15                                                       | 0.07                           | 0.88                         | 0.15                                                    | 0.07                           | 0.88                         | 0.15                                                    |
| >1018                                 | rpsP                   | SAUR1240 (SAR_RS06200)  | 0.00                              | 0.00                            | 0.00                                                       | 0.00                           | 0.00                         | 0.00                                                    | 0.00                           | 0.00                         | 0.00                                                    |
| >1019                                 | rsmM                   | SAUR1241 (SAR_RS06205)  | 0.00                              | 4.56                            | 0.60                                                       | 0.00                           | 4.56                         | 0.60                                                    | 0.00                           | 4.56                         | 0.60                                                    |
| >1020                                 | rsmD                   | SAUR1242 (SAR_RS06210)  | 0.00                              | 4.07                            | 1.08                                                       | 0.00                           | 4.07                         | 1.08                                                    | 0.00                           | 4.07                         | 1.08                                                    |
| >1021                                 | pilS                   | SAUR1243 (SAR_RS06215)  | 0.00                              | 0.28                            | 0.57                                                       | 0.00                           | 0.28                         | 0.57                                                    | 0.00                           | 0.28                         | 0.57                                                    |
| >1022                                 |                        |                         |                                   |                                 |                                                            |                                |                              |                                                         |                                |                              |                                                         |

| Number/<br>Position in<br>figures | Gene ID           | ID in PubMLST cg scheme | ED133 vs. swan<br>isolate 15V8707 | X22 vs. swan isolate<br>15V8707 | CC522 goat isolate<br>17CS1042 vs. swan<br>isolate 15V8707 | ED133 vs. duck<br>isolate V315 | X22 vs. duck isolate<br>V315 | CC522 goat isolate<br>17CS1042 vs. duck<br>isolate V315 | ED133 vs. duck<br>isolate V482 | X22 vs. duck isolate<br>V482 | CC522 goat isolate<br>17CS1042 vs. duck<br>isolate V482 |
|-----------------------------------|-------------------|-------------------------|-----------------------------------|---------------------------------|------------------------------------------------------------|--------------------------------|------------------------------|---------------------------------------------------------|--------------------------------|------------------------------|---------------------------------------------------------|
| >1074                             | mutL              | (N/A)                   | 0.05                              | 0.80                            | 0.40                                                       | 0.10                           | 0.85                         | 0.45                                                    | 0.05                           | 0.80                         | 0.40                                                    |
| >1075                             | glpP              | (N/A)                   | 0.00                              | 2.62                            | 0.75                                                       | 0.00                           | 2.62                         | 0.75                                                    | 0.37                           | 3.00                         | 1.12                                                    |
| >1076                             | glpF              | SAUR1303 (SAR_R506515)  | 0.12                              | 0.85                            | 0.73                                                       | 0.24                           | 0.98                         | 0.85                                                    | 0.24                           | 0.98                         | 0.85                                                    |
| >1077                             | glpK              | SAUR1304 (SAR_R506520)  | 0.00                              | 0.73                            | 0.40                                                       | 0.00                           | 0.73                         | 0.40                                                    | 0.00                           | 0.73                         | 0.40                                                    |
| >1078                             | glpD              | SAUR1305 (SAR_R506525)  | 0.00                              | 1.51                            | 0.17                                                       | 0.00                           | 1.51                         | 0.17                                                    | 0.00                           | 1.51                         | 0.17                                                    |
| >1079                             | pldB2             | SAUR1306 (SAR_R506530)  | 0.11                              | 1.31                            | 0.87                                                       | 0.00                           | 1.20                         | 0.77                                                    | 0.00                           | 1.20                         | 0.77                                                    |
| >1080                             | miaA              | SAUR1307 (SAR_R506535)  | 0.00                              | 2.35                            | 0.21                                                       | 0.00                           | 2.35                         | 0.21                                                    | 0.00                           | 2.35                         | 0.21                                                    |
| >1081                             | hflq              | SAUR1308 (SAR_R506540)  | 0.00                              | 0.85                            | 0.43                                                       | 0.00                           | 0.85                         | 0.43                                                    | 0.00                           | 0.85                         | 0.43                                                    |
| >1082                             | gpxA-L1-bsaA1     | SAUR1309 (SAR_R506545)  | 0.00                              | 1.05                            | 0.42                                                       | 0.00                           | 1.05                         | 0.42                                                    | 0.00                           | 1.05                         | 0.42                                                    |
| >1083                             | ynbA-HfX          | SAUR1310 (SAR_R506550)  | 0.08                              | 0.56                            | 0.81                                                       | 0.16                           | 0.65                         | 0.89                                                    | 0.16                           | 0.65                         | 0.89                                                    |
| >1084                             | ynbB              | SAUR1311 (SAR_R506555)  | 0.08                              | 1.69                            | 1.61                                                       | 0.00                           | 1.69                         | 1.61                                                    | 0.00                           | 1.69                         | 1.61                                                    |
| >1085                             | glnR-femC         | (N/A)                   | 0.00                              | 0.81                            | 0.00                                                       | 0.00                           | 0.81                         | 0.00                                                    | 0.00                           | 0.81                         | 0.00                                                    |
| >1086                             | glnA              | SAUR1313 (SAR_R506565)  | 0.00                              | 3.06                            | 0.45                                                       | 0.00                           | 3.06                         | 0.45                                                    | 0.07                           | 3.13                         | 0.52                                                    |
| >1087                             | A6U1C8            | (N/A)                   | 0.00                              | 2.02                            | 2.02                                                       | 0.00                           | 2.02                         | 2.02                                                    | 0.00                           | 2.02                         | 2.02                                                    |
| >1088                             | Q2FY4             | (N/A)                   | 0.00                              | 2.22                            | 3.56                                                       | >=5.00                         | >=5.00                       | >=5.00                                                  | >=5.00                         | >=5.00                       | >=5.00                                                  |
| >1089                             | AS15J3            | (N/A)                   | 0.00                              | >=5.00                          | 0.48                                                       | 0.00                           | >=5.00                       | 0.48                                                    | 0.00                           | >=5.00                       | 0.48                                                    |
| >1090                             | Q2YXQ4            | (N/A)                   | 0.00                              | 0.00                            | 0.00                                                       | 0.00                           | 0.00                         | 0.00                                                    | 0.00                           | 0.00                         | 0.00                                                    |
| >1091                             | A6OGJ8            | SAUR1352 (SAR_R506760)  | 0.00                              | 1.66                            | 1.36                                                       | 0.10                           | 1.66                         | 1.36                                                    | 0.10                           | 1.66                         | 1.36                                                    |
| >1092                             | AS15I9            | (N/A)                   | 0.00                              | 2.02                            | 1.01                                                       | 0.00                           | 2.02                         | 1.01                                                    | 0.00                           | 2.02                         | 1.01                                                    |
| >1093                             | ds1               | SAUR1354 (SAR_R506770)  | 0.00                              | >=5.00                          | 0.54                                                       | 0.00                           | >=5.00                       | 0.54                                                    | 0.00                           | >=5.00                       | 0.54                                                    |
| >1094                             | Q99UF3            | SAUR1359 (SAR_R506795)  | 0.00                              | 0.53                            | 2.12                                                       | 0.00                           | 0.53                         | 2.12                                                    | 0.00                           | 0.53                         | 2.12                                                    |
| >1095                             | nuc2=nucH         | SAUR1360 (SAR_R506800)  | 0.00                              | 0.37                            | 0.56                                                       | 0.00                           | 0.37                         | 0.56                                                    | 0.00                           | 0.37                         | 0.56                                                    |
| >1096                             | QSHG96            | SAUR1361 (SAR_R506805)  | 0.00                              | 0.70                            | 0.23                                                       | 0.00                           | 0.70                         | 0.23                                                    | 0.00                           | 0.70                         | 0.23                                                    |
| >1097                             | QSHG95            | SAUR1362 (SAR_R506810)  | 0.34                              | 0.85                            | 1.02                                                       | 0.17                           | 0.68                         | 0.85                                                    | 0.17                           | 0.68                         | 0.85                                                    |
| >1098                             | thrA              | SAUR1363 (SAR_R506815)  | 0.00                              | 0.65                            | 0.43                                                       | 0.00                           | 0.65                         | 0.43                                                    | 0.00                           | 0.65                         | 0.43                                                    |
| >1099                             | hom-rhoM          | SAUR1364 (SAR_R506820)  | 0.00                              | 0.55                            | 0.55                                                       | 0.00                           | 0.55                         | 0.55                                                    | 0.00                           | 0.55                         | 0.55                                                    |
| >1100                             | thrC              | SAUR1365 (SAR_R506825)  | 0.00                              | 0.94                            | >=5.00                                                     | 0.00                           | 0.94                         | >=5.00                                                  | 0.00                           | 0.94                         | >=5.00                                                  |
| >1101                             | thrB              | SAUR1366 (SAR_R506830)  | 0.00                              | 1.75                            | 0.98                                                       | 0.00                           | 1.75                         | 0.98                                                    | 0.00                           | 1.75                         | 0.98                                                    |
| >1102                             | yyeH              | SAUR1367 (SAR_R506835)  | 0.00                              | 2.24                            | 2.24                                                       | 0.00                           | 2.24                         | 2.24                                                    | 0.00                           | 2.24                         | 2.24                                                    |
| >1103                             | QSHG88            | SAUR1368 (SAR_R506840)  | 0.00                              | 0.32                            | 0.00                                                       | 0.00                           | 0.32                         | 0.00                                                    | 0.00                           | 0.32                         | 0.00                                                    |
| >1104                             | lypZ-QSHG87       | SAUR1370 (SAR_R506850)  | 0.07                              | 0.69                            | 0.76                                                       | 0.07                           | 0.69                         | 0.76                                                    | 0.07                           | 0.69                         | 0.76                                                    |
| >1105                             | katJ              | SAUR1371 (SAR_R506855)  | 0.07                              | 1.29                            | 0.13                                                       | 0.00                           | 1.91                         | 0.13                                                    | 0.00                           | 1.91                         | 0.13                                                    |
| >1106                             | rpmG              | SAUR1372 (SAR_R506860)  | 0.00                              | 0.00                            | 0.66                                                       | 0.00                           | 0.00                         | 0.66                                                    | 0.00                           | 0.66                         | 1.32                                                    |
| >1107                             | rpsN              | SAUR1373 (SAR_R506865)  | 0.00                              | >=5.00                          | 0.00                                                       | 0.00                           | >=5.00                       | 0.00                                                    | 0.00                           | >=5.00                       | 0.00                                                    |
| >1108                             | guaC              | SAUR1374 (SAR_R506870)  | 0.00                              | 0.61                            | 0.10                                                       | 0.00                           | 0.61                         | 0.10                                                    | 0.00                           | 0.61                         | 0.10                                                    |
| >1109                             | ylibC1            | SAUR1376 (SAR_R506880)  | 0.00                              | 1.85                            | 1.27                                                       | 0.00                           | 1.85                         | 1.27                                                    | 0.00                           | 1.85                         | 1.27                                                    |
| >1110                             | lexA              | SAUR1377 (SAR_R506885)  | 0.00                              | 1.12                            | 0.48                                                       | 0.00                           | 1.12                         | 0.48                                                    | 0.00                           | 1.12                         | 0.48                                                    |
| >1111                             | QSHG79            | (N/A)                   | 0.00                              | 1.28                            | 0.85                                                       | 0.00                           | 1.28                         | 0.85                                                    | 0.00                           | 1.28                         | 0.85                                                    |
| >1112                             | DUF896            | SAUR1379 (SAR_R506895)  | 0.00                              | 0.41                            | 0.41                                                       | 0.00                           | 0.41                         | 0.41                                                    | 0.00                           | 0.41                         | 0.41                                                    |
| >1113                             | hkt               | SAUR1380 (SAR_R506900)  | 0.00                              | 1.16                            | 0.15                                                       | 0.00                           | 1.16                         | 0.15                                                    | 0.10                           | 1.26                         | 0.25                                                    |
| >1114                             | UPPF0154          | (N/A)                   | 0.00                              | 0.00                            | 0.00                                                       | 0.00                           | 0.00                         | 0.00                                                    | 0.00                           | 0.00                         | 0.00                                                    |
| >1115                             | ccdC              | SAUR1383 (SAR_R506915)  | 0.00                              | 0.21                            | 0.00                                                       | 0.21                           | 0.43                         | 0.21                                                    | 0.00                           | 0.43                         | 0.21                                                    |
| >1116                             | sbcD              | SAUR1384 (SAR_R506920)  | 0.09                              | 1.43                            | 1.07                                                       | 0.09                           | 1.43                         | 1.07                                                    | 0.18                           | 1.52                         | 1.16                                                    |
| >1117                             | sbcC              | (N/A)                   | 0.00                              | 1.65                            | 0.73                                                       | 0.00                           | 1.65                         | 0.73                                                    | 0.03                           | 1.68                         | 0.76                                                    |
| >1118                             | mscL              | SAUR1388 (SAR_R506940)  | 0.00                              | 0.00                            | 0.28                                                       | 0.00                           | 0.00                         | 0.28                                                    | 0.00                           | 0.00                         | 0.28                                                    |
| >1119                             | opuA1             | SAUR1389 (SAR_R506945)  | 0.07                              | 1.03                            | 0.91                                                       | 0.00                           | 1.03                         | 0.91                                                    | 0.00                           | 1.03                         | 0.91                                                    |
| >1120                             | acnA-citB         | SAUR1390 (SAR_R506950)  | 0.00                              | 0.78                            | 0.31                                                       | 0.07                           | 0.85                         | 0.41                                                    | 0.07                           | 0.85                         | 0.41                                                    |
| >1121                             | yneP              | SAUR1391 (SAR_R506955)  | 1.27                              | 1.48                            | 1.27                                                       | 0.00                           | 0.21                         | 0.00                                                    | 0.21                           | 0.42                         | 0.21                                                    |
| >1122                             | yneR              | SAUR1392 (SAR_R506960)  | 0.00                              | 1.01                            | 0.00                                                       | 0.00                           | 1.01                         | 0.00                                                    | 0.00                           | 1.01                         | 0.00                                                    |
| >1123                             | plsV              | SAUR1393 (SAR_R506965)  | 0.00                              | 0.83                            | 0.33                                                       | 0.00                           | 0.83                         | 0.33                                                    | 0.00                           | 0.83                         | 0.33                                                    |
| >1124                             | grlB=gyrB=parE    | SAUR1394 (SAR_R506970)  | 0.00                              | 0.95                            | 0.55                                                       | 0.00                           | 0.95                         | 0.55                                                    | 0.00                           | 0.95                         | 0.55                                                    |
| >1125                             | lcpA=parC         | SAUR1395 (SAR_R506975)  | 0.08                              | 0.50                            | 0.54                                                       | 0.04                           | 0.54                         | 0.50                                                    | 0.04                           | 0.54                         | 0.50                                                    |
| >1126                             | alsT              | SAUR1397 (SAR_R506985)  | 0.00                              | >=5.00                          | >=5.00                                                     | 0.00                           | >=5.00                       | >=5.00                                                  | 0.00                           | >=5.00                       | >=5.00                                                  |
| >1127                             | glcT              | SAUR1398 (SAR_R506990)  | 0.00                              | 1.29                            | 0.82                                                       | 0.11                           | 1.41                         | 0.84                                                    | 0.11                           | 1.51                         | 0.94                                                    |
| >1128                             | yubA=cozEb=yyhT2  | SAUR1400 (SAR_R507000)  | 0.00                              | 0.83                            | 0.08                                                       | 0.00                           | 0.83                         | 0.08                                                    | 0.00                           | 0.83                         | 0.08                                                    |
| >1129                             | mprF              | SAUR1401 (SAR_R507005)  | 0.08                              | 3.01                            | 1.11                                                       | 0.08                           | 3.01                         | 1.11                                                    | 0.12                           | 3.05                         | 1.15                                                    |
| >1130                             | msrA1             | SAUR1402 (SAR_R507010)  | 0.00                              | 0.39                            | 0.00                                                       | 0.20                           | 0.59                         | 0.20                                                    | 0.00                           | 0.39                         | 0.00                                                    |
| >1131                             | lcpA=tagT=msrR    | SAUR1403 (SAR_R507015)  | 0.00                              | 0.41                            | 0.10                                                       | 0.00                           | 0.41                         | 0.10                                                    | >=5.00                         | >=5.00                       | >=5.00                                                  |
| >1132                             | dmpI              | SAUR1405 (SAR_R507025)  | 0.00                              | 0.00                            | 0.54                                                       | 0.00                           | 0.00                         | 0.54                                                    | 0.00                           | 0.00                         | 0.54                                                    |
| >1133                             | lucW              | SAUR1406 (SAR_R507030)  | 0.00                              | 1.03                            | 1.11                                                       | 0.16                           | 1.19                         | 1.27                                                    | 0.16                           | 1.27                         | 1.35                                                    |
| >1134                             | lyrA              | SAUR1407 (SAR_R507035)  | 0.00                              | 1.01                            | 1.19                                                       | 0.00                           | 1.19                         | 1.19                                                    | 0.00                           | 1.01                         | 1.19                                                    |
| >1135                             | yhIE              | SAUR1408 (SAR_R507040)  | 0.00                              | 0.78                            | 0.48                                                       | 0.10                           | 0.87                         | 0.58                                                    | 0.00                           | 0.78                         | 0.48                                                    |
| >1136                             | trpE              | SAUR1409 (SAR_R507045)  | 0.07                              | 2.63                            | 1.07                                                       | 0.00                           | 2.56                         | 0.99                                                    | 0.07                           | 2.63                         | 1.07                                                    |
| >1137                             | trpG              | SAUR1410 (SAR_R507050)  | 0.00                              | >=5.00                          | >=5.00                                                     | 0.00                           | >=5.00                       | >=5.00                                                  | 0.00                           | >=5.00                       | >=5.00                                                  |
| >1138                             | trpD              | (N/A)                   | 0.00                              | 3.90                            | 3.20                                                       | 0.00                           | 3.90                         | 3.20                                                    | 0.00                           | 3.90                         | 3.20                                                    |
| >1139                             | trpC              | SAUR1412 (SAR_R507060)  | 0.13                              | 2.55                            | 1.78                                                       | 0.25                           | 2.68                         | 1.91                                                    | 0.13                           | 2.55                         | 1.78                                                    |
| >1140                             | trpI              | (N/A)                   | 0.00                              | 1.90                            | 2.05                                                       | 0.00                           | 2.05                         | 0.00                                                    | 0.00                           | 2.05                         | 0.00                                                    |
| >1141                             | trpB              | SAUR1414 (SAR_R507070)  | >=5.00                            | >=5.00                          | >=5.00                                                     | >=5.00                         | >=5.00                       | >=5.00                                                  | >=5.00                         | >=5.00                       | >=5.00                                                  |
| >1142                             | trpA              | SAUR1415 (SAR_R507075)  | 0.00                              | 1.23                            | 0.69                                                       | 0.00                           | 1.23                         | 0.69                                                    | 0.00                           | 1.23                         | 0.69                                                    |
| >1143                             | femA              | SAUR1416 (SAR_R507080)  | 0.00                              | 3.30                            | 3.30                                                       | 3.07                           | 0.38                         | 0.38                                                    | 3.07                           | 0.38                         | 0.38                                                    |
| >1144                             | femB              | SAUR1417 (SAR_R507085)  | 0.08                              | 0.56                            | 0.79                                                       | 0.00                           | 0.48                         | 0.71                                                    | 0.00                           | 0.48                         | 0.71                                                    |
| >1145                             | cof               | (N/A)                   | 0.00                              | >=5.00                          | 2.45                                                       | 0.00                           | >=5.00                       | 2.45                                                    | 0.00                           | >=5.00                       | 2.45                                                    |
| >1146                             | QSHG42            | SAUR1419 (SAR_R507095)  | 0.00                              | 1.90                            | 1.27                                                       | 0.00                           | 1.90                         | 1.27                                                    | 0.00                           | 1.90                         | 1.27                                                    |
| >1147                             | nikR              | SAUR1420 (SAR_R507100)  | 0.00                              | 1.85                            | 0.57                                                       | 0.28                           | 2.14                         | 0.85                                                    | 0.28                           | 2.14                         | 0.85                                                    |
| >1148                             | nikH=ngsIA        | SAUR1421 (SAR_R507105)  | 0.00                              | 2.33                            | 0.26                                                       | 0.00                           | 2.33                         | 0.26                                                    | 0.00                           | 2.33                         | 0.26                                                    |
| >1149                             | nikC              | SAUR1422 (SAR_R507110)  | 0.00                              | 2.28                            | 0.24                                                       | 0.00                           | 2.28                         | 0.24                                                    | 0.12                           | 2.40                         | 0.36                                                    |
| >1150                             | nikB              | SAUR1423 (SAR_R507115)  | 0.00                              | 1.62                            | 0.30                                                       | 0.00                           | 1.62                         | 0.30                                                    | 0.00                           | 1.62                         | 0.30                                                    |
| >1151                             | QSHG37            | SAUR1425 (SAR_R507125)  | 0.00                              | 1.16                            | 1.16                                                       | 0.00                           | 1.16                         | 1.16                                                    | 0.00                           | 1.16                         | 1.16                                                    |
| >1152                             | pepF2             | SAUR1426 (SAR_R507130)  | 0.00                              | 0.72                            | 0.44                                                       | 0.00                           | 0.72                         | 0.44                                                    | 0.06                           | 0.77                         | 0.50                                                    |
| >1153                             | phoU              | SAUR1427 (SAR_R507135)  | 0.00                              | 0.78                            | 0.93                                                       | 0.00                           | 0.78                         | 0.93                                                    | 0.00                           | 0.78                         | 0.93                                                    |
| >1154                             | psvB              | SAUR1428 (SAR_R507140)  | 0.00                              | 1.76                            | 0.23                                                       | 0.12                           | 1.88                         | 0.35                                                    | 0.12                           | 1.88                         | 0.35                                                    |
| >1155                             | pstA              | SAUR1429 (SAR_R507145)  | 0.00                              | 0.65                            | 0.65                                                       | 0.00                           | 0.65                         | 0.65                                                    | 0.00                           | 0.65                         | 0.65                                                    |
| >1156                             | pstC              | SAUR1430 (SAR_R507150)  | 0.00                              | 1.19                            | 1.40                                                       | 0.00                           | 1.19                         | 1.40                                                    | 0.00                           | 1.19                         | 1.40                                                    |
| >1157                             | pstS              | SAUR1431 (SAR_R507155)  | 0.20                              | 0.71                            | 0.81                                                       | 0.10                           | 0.61                         | 0.71                                                    | 0.30                           | 0.81                         | 0.91                                                    |
| >1158                             | cvfB              | SAUR1432 (SAR_R507160)  | 0.00                              | 1.77                            | 0.50                                                       | 0.11                           | 1.88                         | 0.66                                                    | 0.11                           | 1.88                         | 0.66                                                    |
| >1159                             | ykpA              | SAUR1433 (SAR_R507165)  | 0.00                              | 4.24                            | 0.55                                                       | 0.00                           | 4.24                         | 0.50                                                    | 0.12                           | 4.37                         | 0.62                                                    |
| >1160                             | lysC              | SAUR1434 (SAR_R507170)  | 0.00                              | 0.75                            | 0.41                                                       | 0.00                           | 0.75                         | 0.41                                                    | 0.00                           | 0.75                         | 0.41                                                    |
| >1161                             | adp               | SAUR1435 (SAR_R507175)  | 0.10                              | 3.33                            | 0.30                                                       | 0.10                           | 3.33                         | 0.30                                                    | 0.10                           | 3.33                         | 0.30                                                    |
| >1162                             | dapA              | SAUR1436 (SAR_R507180)  | 0.00                              | 3.27                            | 2.25                                                       | 0.00                           | 3.27                         | 2.25                                                    | 0.00                           | 3.27                         | 2.25                                                    |
| >1163                             | dapB              | SAUR1437 (SAR_R507185)  | 0.00                              | 2.77                            | 0.69                                                       | 0.14                           | 2.90                         | 0.83                                                    | 0.14                           | 2.90                         | 0.83                                                    |
| >1164                             | dapD              | SAUR1438 (SAR_R507190)  | 0.14                              | 1.81                            | 0.83                                                       | 0.14                           | 1.81                         | 0.83                                                    | 0.14                           | 1.81                         | 0.83                                                    |
| >1165                             | hipO=yneP         | SAUR1439 (SAR_R507195)  | 0.00                              | 1.04                            | 0.61                                                       | 0.00                           | 1.04                         | 0.61                                                    | 0.00                           | 1.04                         | 0.61                                                    |
| >1166                             | alr2              | SAUR1440 (SAR_R507200)  | 0.18                              | 1.38                            | 1.01                                                       | 0.00                           | 1.20                         | 0.83                                                    | 0.00                           | 1.20                         | 0.83                                                    |
| >1167                             | lysA              | SAUR1441 (SAR_R507205)  | 0.08                              | 1.34                            | 0.79                                                       | 0.08                           | 1.34                         | 0.79                                                    | 0.08                           | 1.34                         | 0.79                                                    |
| >1168                             | cspC-L2=msaB=cspA | (N/A)                   | 0.00                              | 0.00                            | 0.00                                                       | 0.00                           | 0.00                         | 0.00                                                    | 0.00                           | 0.00                         | 0.00                                                    |
| >1169                             | msaB              | SAUR1445 (SAR_R507225)  | 0.00                              | 0.32                            | 0.32                                                       | 0.00                           | 0.32                         | 0.32                                                    | 0.00                           | 0.32                         | 0.32                                                    |
| >1170                             | acyP              | SAUR1446 (SAR_R507230)  | 0.00                              | 0.37                            | 0.37                                                       | 0.00                           | 0.37                         | 0.37                                                    | 0.00                           | 0.37                         | 0.37</                                                  |



| Number/<br>Position in<br>the figures | Gene ID        | ID in PubMILT cg scheme | ED133 vs. swan<br>isolate 15V8707 | X22 vs. swan isolate<br>15V8707 | CC522 goat isolate<br>17CS1042 vs. swan<br>isolate 15V8707 | ED133 vs. duck<br>isolate V315 | X22 vs. duck isolate<br>V315 | CC522 goat isolate<br>17CS1042 vs. duck<br>isolate V315 | ED133 vs. duck<br>isolate V482 | X22 vs. duck isolate<br>V482 | CC522 goat isolate<br>17CS1042 vs. duck<br>isolate V482 |
|---------------------------------------|----------------|-------------------------|-----------------------------------|---------------------------------|------------------------------------------------------------|--------------------------------|------------------------------|---------------------------------------------------------|--------------------------------|------------------------------|---------------------------------------------------------|
| >1222                                 | ypjD           | SAUR1503 (SAR_RS07515)  | 0.00                              | 0.63                            | 0.31                                                       | 0.00                           | 0.63                         | 0.31                                                    | 0.31                           | 0.94                         | 0.63                                                    |
| >1223                                 | yugP           | SAUR1504 (SAR_RS07520)  | 0.00                              | 0.56                            | 0.56                                                       | 0.00                           | 0.56                         | 0.56                                                    | 0.00                           | 0.56                         | 0.56                                                    |
| >1224                                 | ypjA=DUF1405   | SAUR1505 (SAR_RS07525)  | 0.00                              | >=5.00                          | >=5.00                                                     | 0.00                           | >=5.00                       | >=5.00                                                  | 0.00                           | >=5.00                       | >=5.00                                                  |
| >1225                                 | ypjB           | SAUR1506 (SAR_RS07530)  | 0.00                              | 1.04                            | 0.87                                                       | 0.00                           | 1.04                         | 0.87                                                    | 0.00                           | 1.04                         | 0.87                                                    |
| >1226                                 | ypjA           | SAUR1507 (SAR_RS07535)  | 0.08                              | 0.72                            | 0.88                                                       | 0.08                           | 0.72                         | 0.88                                                    | 0.08                           | 0.72                         | 0.88                                                    |
| >1227                                 | aroA           | SAUR1508 (SAR_RS07540)  | 0.00                              | 4.46                            | 0.69                                                       | 0.00                           | 4.46                         | 0.69                                                    | 0.00                           | 4.46                         | 0.69                                                    |
| >1228                                 | aroB           | SAUR1509 (SAR_RS07545)  | 0.00                              | 3.38                            | 1.03                                                       | 0.09                           | 3.47                         | 1.13                                                    | 0.00                           | 3.38                         | 1.03                                                    |
| >1229                                 | aroC           | SAUR1510 (SAR_RS07550)  | 0.00                              | >=5.00                          | 0.43                                                       | 0.00                           | >=5.00                       | 0.43                                                    | 0.00                           | >=5.00                       | 0.43                                                    |
| >1230                                 | ndk            | SAUR1511 (SAR_RS07555)  | 0.00                              | 0.89                            | 0.67                                                       | 0.00                           | 0.89                         | 0.67                                                    | 0.00                           | 0.89                         | 0.67                                                    |
| >1231                                 | gerCChepT      | SAUR1512 (SAR_RS07560)  | 0.10                              | 1.25                            | 0.94                                                       | 0.10                           | 1.25                         | 0.94                                                    | 0.10                           | 1.25                         | 0.94                                                    |
| >1232                                 | ubjB           | SAUR1513 (SAR_RS07565)  | 0.00                              | 1.10                            | 0.41                                                       | 0.00                           | 1.10                         | 0.41                                                    | 0.00                           | 1.10                         | 0.41                                                    |
| >1233                                 | gerCA          | SAUR1514 (SAR_RS07570)  | 0.00                              | 0.00                            | 0.87                                                       | 0.00                           | 1.05                         | 0.87                                                    | 0.00                           | 1.05                         | 0.87                                                    |
| >1234                                 | hup            | (N/A)                   | 0.00                              | 0.00                            | 0.00                                                       | 0.00                           | 0.00                         | 0.00                                                    | 0.00                           | 0.00                         | 0.00                                                    |
| >1235                                 | gpdA           | SAUR1517 (SAR_RS07585)  | 0.00                              | 1.40                            | 0.50                                                       | 0.10                           | 1.50                         | 0.60                                                    | 0.00                           | 1.40                         | 0.50                                                    |
| >1236                                 | engA=der       | SAUR1518 (SAR_RS07590)  | 0.00                              | 1.30                            | 0.76                                                       | 0.08                           | 1.37                         | 0.84                                                    | 0.00                           | 1.30                         | 0.76                                                    |
| >1237                                 | rpsA           | SAUR1519 (SAR_RS07595)  | 0.00                              | 0.60                            | 0.26                                                       | 0.00                           | 0.60                         | 0.26                                                    | 0.00                           | 0.60                         | 0.26                                                    |
| >1238                                 | QZFYH8         | SAUR1520 (SAR_RS07600)  | 0.00                              | 3.13                            | 2.60                                                       | 0.00                           | 3.13                         | 2.60                                                    | 0.00                           | 3.13                         | 2.60                                                    |
| >1239                                 | cmk            | SAUR1523 (SAR_RS07615)  | 0.00                              | >=5.00                          | 0.76                                                       | 0.00                           | >=5.00                       | 0.76                                                    | 0.00                           | >=5.00                       | 0.76                                                    |
| >1240                                 | ansA           | SAUR1524 (SAR_RS07620)  | 0.00                              | 1.96                            | 1.55                                                       | 0.00                           | 1.96                         | 1.55                                                    | 0.00                           | 1.96                         | 1.55                                                    |
| >1241                                 | ypdA=czcO      | SAUR1525 (SAR_RS07625)  | 0.00                              | 0.91                            | 0.10                                                       | 0.00                           | 0.91                         | 0.10                                                    | 0.00                           | 0.91                         | 0.10                                                    |
| >1242                                 | ebpS           | SAUR2991                | 0.00                              | 1.16                            | 1.98                                                       | 0.00                           | 1.16                         | 1.98                                                    | 0.00                           | 1.16                         | 1.98                                                    |
| >1243                                 | recQ2          | SAUR1528 (SAR_RS07640)  | 0.00                              | 3.26                            | 0.58                                                       | 0.00                           | 3.26                         | 0.58                                                    | 0.00                           | 3.26                         | 0.58                                                    |
| >1244                                 | ASIT10         | SAUR1529 (SAR_RS07645)  | 0.00                              | 1.05                            | 2.10                                                       | 0.00                           | 1.05                         | 2.10                                                    | 0.00                           | 1.05                         | 2.10                                                    |
| >1245                                 | fer            | SAUR1530 (SAR_RS07650)  | 0.00                              | 0.80                            | 0.00                                                       | 0.00                           | 0.80                         | 0.00                                                    | 0.00                           | 0.80                         | 0.00                                                    |
| >1246                                 | rhuJ           | SAUR1531 (SAR_RS07655)  | 0.00                              | 1.28                            | 0.92                                                       | 0.00                           | 1.28                         | 0.92                                                    | 0.00                           | 1.28                         | 0.92                                                    |
| >1247                                 | ASIT17         | SAUR1313 (SAR_RS06565)  | 0.00                              | >=5.00                          | >=5.00                                                     | 0.00                           | >=5.00                       | >=5.00                                                  | 0.00                           | >=5.00                       | >=5.00                                                  |
| >1248                                 | srhB           | SAUR1605 (SAR_RS08025)  | 0.00                              | 1.20                            | 1.03                                                       | 0.00                           | 1.20                         | 1.03                                                    | 0.00                           | 1.20                         | 1.03                                                    |
| >1249                                 | srhA           | SAUR1606 (SAR_RS08030)  | 0.00                              | 0.13                            | 2.55                                                       | 0.00                           | 0.13                         | 2.55                                                    | 0.00                           | 0.13                         | 2.55                                                    |
| >1250                                 | rhuB           | SAUR1607 (SAR_RS08035)  | 0.14                              | 3.66                            | 2.44                                                       | 0.14                           | 3.66                         | 2.44                                                    | 0.14                           | 3.66                         | 2.44                                                    |
| >1251                                 | scpB           | SAUR1608 (SAR_RS08040)  | 0.00                              | >=5.00                          | 0.37                                                       | 0.00                           | >=5.00                       | 0.37                                                    | 0.00                           | >=5.00                       | 0.37                                                    |
| >1252                                 | scpA           | SAUR1609 (SAR_RS08045)  | 0.00                              | 1.23                            | 0.27                                                       | 0.00                           | 1.23                         | 0.27                                                    | 0.00                           | 1.23                         | 0.27                                                    |
| >1253                                 | QZFYH8=DUF0309 | SAUR1610 (SAR_RS08050)  | 0.00                              | 0.79                            | 0.39                                                       | 0.00                           | 0.79                         | 0.39                                                    | 0.00                           | 0.79                         | 0.39                                                    |
| >1254                                 | verD           | SAUR1611 (SAR_RS08055)  | 0.11                              | 1.13                            | 1.24                                                       | 0.23                           | 1.24                         | 1.24                                                    | 0.23                           | 1.24                         | 0.34                                                    |
| >1255                                 | fur            | SAUR1612 (SAR_RS08060)  | 0.00                              | 0.67                            | 0.22                                                       | 0.00                           | 0.67                         | 0.22                                                    | 0.00                           | 0.67                         | 0.22                                                    |
| >1256                                 | nudF           | SAUR1613 (SAR_RS08065)  | >=5.00                            | >=5.00                          | >=5.00                                                     | 0.00                           | 0.55                         | 0.55                                                    | 0.00                           | 0.55                         | 0.55                                                    |
| >1257                                 | yhdN           | SAUR1614 (SAR_RS08070)  | 0.11                              | 1.21                            | 0.55                                                       | 0.00                           | 1.10                         | 0.44                                                    | 0.00                           | 1.10                         | 0.44                                                    |
| >1258                                 | QSHF51         | SAUR1615 (SAR_RS08075)  | 0.00                              | 0.40                            | 0.80                                                       | 0.00                           | 0.40                         | 0.80                                                    | 0.00                           | 0.40                         | 0.80                                                    |
| >1259                                 | yqjQ           | SAUR2992                | 0.00                              | 1.85                            | 0.93                                                       | 0.00                           | 1.85                         | 0.93                                                    | 0.00                           | 1.85                         | 0.93                                                    |
| >1260                                 | proC           | SAUR1617 (SAR_RS08085)  | 0.00                              | 0.12                            | 0.61                                                       | 0.00                           | 0.12                         | 0.61                                                    | 0.00                           | 0.12                         | 0.61                                                    |
| >1261                                 | rmz            | SAUR1618 (SAR_RS08090)  | 0.00                              | 0.54                            | 1.09                                                       | 0.11                           | 0.65                         | 1.19                                                    | 0.00                           | 0.54                         | 1.09                                                    |
| >1262                                 | zwf            | SAUR1619 (SAR_RS08095)  | 0.00                              | 1.08                            | 0.74                                                       | 0.00                           | 1.08                         | 0.74                                                    | 0.00                           | 1.08                         | 0.74                                                    |
| >1263                                 | graE=marA      | (N/A)                   | 0.12                              | 0.23                            | 0.00                                                       | 0.12                           | 0.23                         | 0.00                                                    | 0.12                           | 0.23                         | 0.00                                                    |
| >1264                                 | malA=yugT      | SAUR1621 (SAR_RS08105)  | 0.00                              | 1.58                            | 0.73                                                       | 0.00                           | 1.58                         | 0.73                                                    | 0.00                           | 1.58                         | 0.73                                                    |
| >1265                                 | malR=kdgR      | SAUR1622 (SAR_RS08110)  | 0.00                              | 2.45                            | 2.65                                                       | 0.00                           | 2.45                         | 2.65                                                    | 0.00                           | 2.45                         | 2.65                                                    |
| >1266                                 | QSHFR3         | SAUR1624 (SAR_RS08120)  | 0.00                              | 1.88                            | 0.81                                                       | 0.00                           | 1.88                         | 0.81                                                    | 0.27                           | 2.15                         | 1.08                                                    |
| >1267                                 | OSI184         | (N/A)                   | 0.00                              | 0.00                            | 0.00                                                       | 0.00                           | >=5.00                       | 0.00                                                    | 0.00                           | >=5.00                       | 0.00                                                    |
| >1268                                 | gnd            | SAUR1627 (SAR_RS08135)  | 0.14                              | 0.92                            | 0.64                                                       | 0.07                           | 0.85                         | 0.57                                                    | 0.00                           | 0.85                         | 0.57                                                    |
| >1269                                 | QSHFR1=pepT2   | SAUR1628 (SAR_RS08140)  | 0.00                              | 1.68                            | 1.15                                                       | 0.00                           | 1.68                         | 1.15                                                    | 0.00                           | 1.68                         | 1.15                                                    |
| >1270                                 | yqjA           | SAUR1630 (SAR_RS08150)  | 0.00                              | >=5.00                          | 0.41                                                       | 0.00                           | >=5.00                       | 0.41                                                    | 0.00                           | >=5.00                       | 0.41                                                    |
| >1271                                 | yqjW=fadE      | (N/A)                   | 0.00                              | >=5.00                          | >=5.00                                                     | >=5.00                         | 0.13                         | 0.13                                                    | >=5.00                         | 0.13                         | 0.13                                                    |
| >1272                                 | bfmBB          | SAUR1632 (SAR_RS08160)  | 0.00                              | 3.06                            | 0.08                                                       | 0.00                           | 3.06                         | 0.08                                                    | 0.00                           | 3.06                         | 0.08                                                    |
| >1273                                 | bfmBAA         | SAUR2994                | 0.10                              | 4.57                            | 0.71                                                       | 0.10                           | 4.57                         | 0.71                                                    | 0.20                           | 4.57                         | 0.71                                                    |
| >1274                                 | bfmBA7         | SAUR1634 (SAR_RS08170)  | 0.00                              | 1.61                            | 0.60                                                       | 0.00                           | 1.61                         | 0.60                                                    | 0.00                           | 1.61                         | 0.60                                                    |
| >1275                                 | lpgA           | SAUR1635 (SAR_RS08175)  | 0.00                              | 0.98                            | 0.28                                                       | 0.08                           | 0.98                         | 0.28                                                    | 0.08                           | 0.98                         | 0.28                                                    |
| >1276                                 | recN           | SAUR1636 (SAR_RS08180)  | 0.00                              | 0.95                            | 0.60                                                       | 0.00                           | 0.95                         | 0.60                                                    | 0.00                           | 0.95                         | 0.60                                                    |
| >1277                                 | ahrC=argR      | SAUR1637 (SAR_RS08185)  | 0.00                              | 0.44                            | 0.44                                                       | 0.00                           | 0.44                         | 0.44                                                    | 0.00                           | 0.44                         | 0.44                                                    |
| >1278                                 | ispA           | SAUR1638 (SAR_RS08190)  | 0.00                              | 1.02                            | 1.02                                                       | 0.00                           | 1.02                         | 1.02                                                    | 0.11                           | 1.13                         | 1.13                                                    |
| >1279                                 | xseB           | SAUR1639 (SAR_RS08195)  | 0.00                              | 0.43                            | 0.00                                                       | 0.00                           | 0.43                         | 0.00                                                    | 0.00                           | 0.43                         | 0.00                                                    |
| >1280                                 | xseA           | SAUR1640 (SAR_RS08200)  | 0.07                              | 0.52                            | 0.30                                                       | 0.00                           | 0.45                         | 0.22                                                    | 0.00                           | 0.45                         | 0.22                                                    |
| >1281                                 | nuoB           | SAUR1641 (SAR_RS08205)  | 0.00                              | 0.26                            | 0.77                                                       | 0.00                           | 0.26                         | 0.77                                                    | 0.00                           | 0.26                         | 0.77                                                    |
| >1282                                 | yqjY           | SAUR1642 (SAR_RS08210)  | 0.00                              | 0.00                            | 0.00                                                       | 0.00                           | 0.00                         | 0.00                                                    | 0.00                           | 0.00                         | 0.00                                                    |
| >1283                                 | accC=ctfB      | SAUR1643 (SAR_RS08215)  | 0.00                              | 0.52                            | 0.81                                                       | 0.00                           | 0.52                         | 0.81                                                    | 0.00                           | 0.52                         | 0.81                                                    |
| >1284                                 | accB           | SAUR1644 (SAR_RS08220)  | 0.00                              | 0.43                            | 0.43                                                       | 0.00                           | 0.43                         | 0.43                                                    | 0.00                           | 0.43                         | 0.43                                                    |
| >1285                                 | efp            | SAUR1645 (SAR_RS08225)  | 0.18                              | 0.18                            | 0.18                                                       | 0.00                           | 0.00                         | 0.00                                                    | 0.00                           | 0.00                         | 0.00                                                    |
| >1286                                 | yqjT           | SAUR1646 (SAR_RS08230)  | 0.00                              | 3.64                            | 0.09                                                       | 0.09                           | 3.73                         | 0.18                                                    | 0.00                           | 3.64                         | 0.09                                                    |
| >1287                                 | QSHFM8         | SAUR1647 (SAR_RS08235)  | 0.00                              | 0.17                            | >=5.00                                                     | 0.17                           | >=5.00                       | 0.00                                                    | 0.17                           | >=5.00                       | >=5.00                                                  |
| >1288                                 | QSHFM7         | SAUR1648 (SAR_RS08240)  | 0.00                              | 0.46                            | 0.91                                                       | 0.00                           | 0.46                         | 0.46                                                    | 0.00                           | 0.46                         | 0.46                                                    |
| >1289                                 | lipM           | SAUR1649 (SAR_RS08245)  | 0.00                              | 0.86                            | 0.12                                                       | 0.06                           | 0.86                         | 0.06                                                    | 0.00                           | 0.84                         | 0.48                                                    |
| >1290                                 | yqjH           | SAUR1650 (SAR_RS08250)  | 0.00                              | 0.77                            | 0.00                                                       | 0.00                           | 0.77                         | 0.00                                                    | 0.25                           | 1.03                         | 0.26                                                    |
| >1291                                 | gcvPB          | SAUR1651 (SAR_RS08255)  | 0.00                              | 1.43                            | 1.09                                                       | 0.07                           | 1.49                         | 1.15                                                    | 0.00                           | 1.43                         | 1.09                                                    |
| >1292                                 | gcvPA          | SAUR1652 (SAR_RS08260)  | 0.00                              | 1.11                            | 1.04                                                       | 0.07                           | 1.19                         | 1.11                                                    | 0.07                           | 1.19                         | 1.11                                                    |
| >1293                                 | gcvT           | SAUR1653 (SAR_RS08265)  | 0.00                              | 0.46                            | 0.82                                                       | 0.00                           | 0.46                         | 0.82                                                    | 0.00                           | 0.46                         | 0.82                                                    |
| >1294                                 | arok           | SAUR1654 (SAR_RS08270)  | 0.00                              | 0.95                            | 0.57                                                       | 0.00                           | 0.95                         | 0.57                                                    | 0.00                           | 0.95                         | 0.57                                                    |
| >1295                                 | comGE          | SAUR1656 (SAR_RS08280)  | 0.00                              | >=5.00                          | >=5.00                                                     | 0.00                           | >=5.00                       | >=5.00                                                  | >=5.00                         | >=5.00                       | >=5.00                                                  |
| >1296                                 | comGE          | SAUR1657 (SAR_RS08285)  | 0.00                              | 0.67                            | 1.67                                                       | 0.67                           | 1.67                         | 1.67                                                    | 0.00                           | 1.67                         | 1.67                                                    |
| >1297                                 | comGD          | (N/A)                   | 0.22                              | 3.80                            | 0.45                                                       | 0.00                           | 3.58                         | 0.22                                                    | 0.00                           | 3.58                         | 0.22                                                    |
| >1298                                 | comGC          | SAUR1659 (SAR_RS08295)  | 0.00                              | >=5.00                          | >=5.00                                                     | 0.00                           | >=5.00                       | >=5.00                                                  | >=5.00                         | >=5.00                       | >=5.00                                                  |
| >1299                                 | comGB          | SAUR1660 (SAR_RS08300)  | 0.00                              | 1.12                            | 0.56                                                       | 0.09                           | 1.21                         | 0.65                                                    | 0.09                           | 1.21                         | 0.65                                                    |
| >1300                                 | comGA          | SAUR1661 (SAR_RS08305)  | 0.00                              | 0.72                            | 0.62                                                       | 0.00                           | 0.72                         | 0.62                                                    | 0.00                           | 0.72                         | 0.62                                                    |
| >1301                                 | yqgX           | SAUR1662 (SAR_RS08310)  | 0.00                              | 0.64                            | >=5.00                                                     | 0.64                           | >=5.00                       | 0.00                                                    | 0.64                           | >=5.00                       | >=5.00                                                  |
| >1302                                 | yqgV           | SAUR1663 (SAR_RS08315)  | 0.00                              | 0.30                            | 0.91                                                       | 0.00                           | 0.30                         | 0.91                                                    | 0.00                           | 0.30                         | 0.91                                                    |
| >1303                                 | qk             | SAUR1664 (SAR_RS08320)  | 0.10                              | 0.41                            | 0.10                                                       | 0.10                           | 0.41                         | 0.10                                                    | 0.10                           | 0.41                         | 0.20                                                    |
| >1304                                 | yqgQ           | (N/A)                   | 0.00                              | 0.00                            | 0.00                                                       | 0.00                           | 0.00                         | 0.00                                                    | 0.00                           | 0.00                         | 0.00                                                    |
| >1305                                 | gluP           | SAUR1666 (SAR_RS08330)  | 0.07                              | 0.55                            | 0.14                                                       | 0.07                           | 0.55                         | 0.14                                                    | 0.07                           | 0.55                         | 0.14                                                    |
| >1306                                 | yqgN           | (N/A)                   | 0.00                              | 1.11                            | 0.19                                                       | 0.00                           | 1.11                         | 0.19                                                    | 0.00                           | 1.11                         | 0.19                                                    |
| >1307                                 | rpmG           | SAUR1372 (SAR_RS06860)  | 0.00                              | 0.00                            | >=5.00                                                     | 0.00                           | 0.00                         | >=5.00                                                  | 0.00                           | 0.00                         | >=5.00                                                  |
| >1308                                 | pbpC=pbp3=fts3 | SAUR1669 (SAR_RS08345)  | 0.00                              | 0.58                            | 0.67                                                       | 0.05                           | 0.63                         | 0.72                                                    | 0.00                           | 0.58                         | 0.67                                                    |
| >1309                                 | sofA=L2        | SAUR1670 (SAR_RS08350)  | 0.00                              | 0.50                            | 0.30                                                       | 0.00                           | 0.50                         | 0.17                                                    | 0.00                           | 0.50                         | 0.17                                                    |
| >1310                                 | zur            | SAUR1671 (SAR_RS08355)  | 0.00                              | 0.24                            | 0.04                                                       | 0.04                           | 0.24                         | 0.04                                                    | 0.00                           | 0.24                         | 0.04                                                    |
| >1311                                 | znuB=mrnB      | SAUR1672 (SAR_RS08360)  | 0.00                              | 0.46                            | 0.46                                                       | 0.00                           | 0.46                         | 0.46                                                    | 0.00                           | 0.46                         | 0.46                                                    |
| >1312                                 | znuC           | SAUR1673 (SAR_RS08365)  | 0.00                              | 0.64                            | 0.64                                                       | >=5.00                         | >=5.00                       | >=5.00                                                  | 0.13                           | 0.76                         | 0.76                                                    |
| >1313                                 | nfo            | SAUR1674 (SAR_RS08370)  | 0.00                              | 0.56                            | 0.11                                                       | 0.00                           | 0.56                         | 0.11                                                    | 0.00                           | 0.56                         | 0.11                                                    |
| >1314                                 | csxB           | SAUR1675 (SAR_RS08375)  | 0.00                              | 0.82                            | 0.22                                                       | 0.00                           | 0.82                         | 0.22                                                    | 0.07                           | 0.89                         | 0.30                                                    |
| >1315                                 | ybgJ           | SAUR1676 (SAR_RS08380)  | 0.00                              | 0.92                            | >=5.00                                                     | >=5.00                         | >=5.00                       | 0.09                                                    | 0.00                           | 0.91                         | >=5.00                                                  |
| >1316                                 | trmX           | SAUR1677 (SAR_RS08385)  | 0.00                              | 1.62                            | 1.18                                                       | 0.00                           | 1.62                         | 1.18                                                    | 0.00                           | 1.62                         | 1.18                                                    |
| >1317                                 | sigE=rrpD      | SAUR1678 (SAR_RS08390)  | 0.00                              | 0.54                            | 0.45                                                       | 0.54                           | 0.54                         | 0.45                                                    | 0.00                           | 0.45                         | 0.45                                                    |
| >1318                                 | dnaG=var1800   | SAUR1679 (SAR_RS08395)  | 0.00                              | 1.33                            | 0.56                                                       | 0.06                           | 1.39                         | 0.61                                                    |                                |                              |                                                         |

| Number/<br>Position in<br>the figures | Gene ID        | ID in PubMLST cg scheme | ED133 vs. swan<br>isolate 15V8707 | X22 vs. swan isolate<br>15V8707 | CC522 goat isolate<br>17CS1042 vs. swan<br>isolate 15V8707 | ED133 vs. duck<br>isolate V315 | X22 vs. duck isolate<br>V315 | CC522 goat isolate<br>17CS1042 vs. duck<br>isolate V315 | ED133 vs. duck<br>isolate V482 | X22 vs. duck isolate<br>V482 | CC522 goat isolate<br>17CS1042 vs. duck<br>isolate V482 |
|---------------------------------------|----------------|-------------------------|-----------------------------------|---------------------------------|------------------------------------------------------------|--------------------------------|------------------------------|---------------------------------------------------------|--------------------------------|------------------------------|---------------------------------------------------------|
| >1370                                 | yrzL           | SAUR1735 (SAR_RS08675)  | 0.00                              | 0.77                            | 0.00                                                       | 0.00                           | 0.77                         | 0.00                                                    | 0.00                           | 0.77                         | 0.00                                                    |
| >1371                                 | alaS           | SAUR1736 (SAR_RS08680)  | 0.00                              | 0.42                            | 0.19                                                       | 0.04                           | 0.46                         | 0.23                                                    | 0.04                           | 0.46                         | 0.23                                                    |
| >1372                                 | recD           | SAUR1737 (SAR_RS08685)  | 0.04                              | 1.45                            | >5.00                                                      | 0.09                           | 1.41                         | >5.00                                                   | 0.00                           | 1.41                         | >5.00                                                   |
| >1373                                 | yrzB           | SAUR1738 (SAR_RS08690)  | 0.00                              | 1.49                            | 0.45                                                       | 0.00                           | 1.49                         | 0.45                                                    | 0.00                           | 1.49                         | 0.45                                                    |
| >1374                                 | mmnAstrmU      | SAUR1739 (SAR_RS08695)  | 0.09                              | 0.63                            | 0.36                                                       | 0.09                           | 0.63                         | 0.36                                                    | 0.09                           | 0.63                         | 0.36                                                    |
| >1375                                 | csd1           | SAUR1740 (SAR_RS08700)  | 0.17                              | 0.79                            | 0.00                                                       | 0.17                           | 0.79                         | 0.00                                                    | 0.17                           | 0.79                         | 0.00                                                    |
| >1376                                 | limB2          | SAUR1741 (SAR_RS08705)  | 0.00                              | 1.48                            | 0.20                                                       | 0.00                           | 1.48                         | 0.20                                                    | 0.00                           | 1.48                         | 0.20                                                    |
| >1377                                 | QSHFD8         | SAUR1742 (SAR_RS08710)  | 0.68                              | 2.04                            | 2.04                                                       | 0.00                           | 1.36                         | 1.36                                                    | 0.00                           | 1.36                         | 1.36                                                    |
| >1378                                 | csbD-L2        | (N/A)                   | 0.00                              | 0.55                            | 0.55                                                       | 0.00                           | 0.55                         | 0.55                                                    | 0.00                           | 0.55                         | 0.55                                                    |
| >1379                                 | cymK           | SAUR1744 (SAR_RS08720)  | 0.00                              | 0.24                            | 0.24                                                       | 0.00                           | 0.24                         | 0.24                                                    | 0.00                           | 0.24                         | 0.24                                                    |
| >1380                                 | rrnA           | SAUR1745 (SAR_RS08725)  | 0.08                              | 0.78                            | 0.63                                                       | 0.08                           | 0.78                         | 0.63                                                    | 0.08                           | 0.78                         | 0.63                                                    |
| >1381                                 | yyrVM          | SAUR1746 (SAR_RS08730)  | 0.05                              | 0.65                            | 0.13                                                       | 0.05                           | 0.65                         | 0.13                                                    | 0.05                           | 0.65                         | 0.13                                                    |
| >1382                                 | aspS           | SAUR1748 (SAR_RS08740)  | 0.00                              | 1.08                            | 0.68                                                       | 0.00                           | 1.08                         | 0.68                                                    | 0.00                           | 1.08                         | 0.68                                                    |
| >1383                                 | hisS           | SAUR1749 (SAR_RS08745)  | 0.00                              | 0.32                            | 0.00                                                       | 0.00                           | 0.32                         | 0.00                                                    | 0.00                           | 0.32                         | 0.00                                                    |
| >1384                                 | lytH           | SAUR1750 (SAR_RS08750)  | 0.11                              | 1.03                            | 0.23                                                       | 0.00                           | 0.91                         | 0.11                                                    | 0.00                           | 0.91                         | 0.11                                                    |
| >1385                                 | dtb            | SAUR1751 (SAR_RS08755)  | 0.00                              | 1.32                            | 0.44                                                       | 0.00                           | 1.32                         | 0.44                                                    | 0.00                           | 1.32                         | 0.44                                                    |
| >1386                                 | relA           | SAUR1752 (SAR_RS08760)  | 1.00                              | 0.90                            | 0.27                                                       | 1.04                           | 0.95                         | 0.32                                                    | 1.04                           | 0.95                         | 0.32                                                    |
| >1387                                 | apt            | SAUR1753 (SAR_RS08765)  | 0.19                              | 0.58                            | 0.19                                                       | 0.00                           | 0.39                         | 0.00                                                    | 0.00                           | 0.39                         | 0.00                                                    |
| >1388                                 | recJ           | SAUR1754 (SAR_RS08770)  | 0.05                              | 1.45                            | 0.40                                                       | 1.50                           | 1.50                         | 0.44                                                    | 0.04                           | 1.50                         | 0.44                                                    |
| >1389                                 | secDF          | SAUR1755 (SAR_RS08775)  | 0.00                              | 0.70                            | 0.26                                                       | 0.00                           | 0.70                         | 0.26                                                    | >5.00                          | >5.00                        | >5.00                                                   |
| >1390                                 | yajC           | SAUR1756 (SAR_RS08780)  | 0.00                              | 0.00                            | 0.77                                                       | 0.00                           | 0.00                         | 0.77                                                    | 0.00                           | 0.77                         | 0.00                                                    |
| >1391                                 | tgt            | SAUR1757 (SAR_RS08785)  | 0.00                              | 0.26                            | 0.00                                                       | 0.09                           | 0.35                         | 0.09                                                    | 0.09                           | 0.35                         | 0.09                                                    |
| >1392                                 | queA           | SAUR1758 (SAR_RS08790)  | 0.00                              | 0.88                            | 0.58                                                       | 0.00                           | 0.88                         | 0.58                                                    | 0.00                           | 0.88                         | 0.58                                                    |
| >1393                                 | rvuB           | SAUR1759 (SAR_RS08795)  | 0.10                              | 1.09                            | 0.60                                                       | 0.00                           | 1.00                         | 0.50                                                    | 0.20                           | 1.09                         | 0.70                                                    |
| >1394                                 | rvuA           | SAUR1760 (SAR_RS08800)  | 0.00                              | 0.33                            | 0.17                                                       | 0.00                           | 0.33                         | 0.17                                                    | 0.00                           | 0.33                         | 0.17                                                    |
| >1395                                 | pheB           | SAUR1761 (SAR_RS08805)  | 0.22                              | 0.22                            | 0.66                                                       | 0.00                           | 0.66                         | 0.44                                                    | 0.44                           | 0.66                         | 0.44                                                    |
| >1396                                 | obgE<cgfA      | SAUR1762 (SAR_RS08810)  | 0.00                              | 1.01                            | 0.23                                                       | 0.00                           | 1.01                         | 0.23                                                    | 0.08                           | 1.08                         | 0.31                                                    |
| >1397                                 | rpmA           | (N/A)                   | 0.00                              | 0.00                            | 0.00                                                       | 0.00                           | 0.00                         | 0.00                                                    | 0.00                           | 0.00                         | 0.00                                                    |
| >1398                                 | DUF0464        | SAUR1764 (SAR_RS08820)  | 0.00                              | 0.00                            | 0.00                                                       | 0.31                           | 0.31                         | 0.31                                                    | 0.31                           | 0.31                         | 0.31                                                    |
| >1399                                 | rplU           | SAUR1765 (SAR_RS08825)  | 0.00                              | 0.32                            | 0.32                                                       | 0.00                           | 0.32                         | 0.32                                                    | 0.00                           | 0.32                         | 0.32                                                    |
| >1400                                 | mreD           | SAUR1766 (SAR_RS08830)  | 0.00                              | 1.32                            | 0.19                                                       | 0.00                           | 1.32                         | 0.19                                                    | 0.00                           | 1.32                         | 0.19                                                    |
| >1401                                 | mreC           | SAUR2996 (mreC)         | 0.84                              | 1.30                            | 0.47                                                       | 1.07                           | 1.07                         | 0.24                                                    | 0.12                           | 1.07                         | 0.24                                                    |
| >1402                                 | QSHF83-DUF4930 | SAUR2997                | 0.00                              | 0.84                            | 0.00                                                       | 0.84                           | 0.84                         | 0.00                                                    | 0.00                           | 0.84                         | 0.00                                                    |
| >1403                                 | QSHF82         | SAUR2998                | 0.00                              | 1.05                            | 1.40                                                       | 0.00                           | 1.05                         | 1.40                                                    | 0.00                           | 1.05                         | 1.40                                                    |
| >1404                                 | radC           | (N/A)                   | 0.15                              | >5.00                           | 0.29                                                       | 0.15                           | >5.00                        | 0.29                                                    | 0.15                           | >5.00                        | 0.29                                                    |
| >1405                                 | comC<outO      | SAUR1778 (SAR_RS08890)  | 0.28                              | 1.69                            | 0.71                                                       | 0.14                           | 1.55                         | 0.56                                                    | 0.14                           | 1.55                         | 0.56                                                    |
| >1406                                 | folC           | SAUR1780 (SAR_RS08900)  | 0.16                              | 0.63                            | 0.24                                                       | 0.08                           | 0.55                         | 0.16                                                    | 0.08                           | 0.55                         | 0.16                                                    |
| >1407                                 | valS           | SAUR1781 (SAR_RS08905)  | 0.04                              | 0.72                            | 0.65                                                       | 0.08                           | 0.76                         | 0.68                                                    | 0.04                           | 0.72                         | 0.65                                                    |
| >1408                                 | tig            | SAUR1782 (SAR_RS08910)  | 0.00                              | 1.60                            | 1.07                                                       | 0.00                           | 1.60                         | 1.07                                                    | 0.00                           | 1.60                         | 1.07                                                    |
| >1409                                 | abrB           | SAUR1783 (SAR_RS08915)  | 0.00                              | 1.49                            | 0.80                                                       | 0.00                           | 1.49                         | 0.84                                                    | 0.00                           | 1.49                         | 0.84                                                    |
| >1410                                 | gsaA           | SAUR1785 (SAR_RS08925)  | 0.00                              | 1.17                            | 0.47                                                       | 0.00                           | 1.17                         | 0.47                                                    | 0.00                           | 1.17                         | 0.47                                                    |
| >1411                                 | hemB           | SAUR1786 (SAR_RS08930)  | 0.00                              | 1.23                            | 1.13                                                       | 0.00                           | 1.23                         | 1.13                                                    | 0.10                           | 1.33                         | 1.23                                                    |
| >1412                                 | hemD           | SAUR1787 (SAR_RS08935)  | 0.00                              | 0.59                            | 1.19                                                       | 0.15                           | 0.74                         | 1.33                                                    | 0.15                           | 0.74                         | 1.33                                                    |
| >1413                                 | hemC           | SAUR1788 (SAR_RS08940)  | 0.00                              | 0.43                            | 0.86                                                       | 0.00                           | 0.43                         | 0.86                                                    | 0.00                           | 0.43                         | 0.86                                                    |
| >1414                                 | hemX           | SAUR1789 (SAR_RS08945)  | 0.00                              | 0.86                            | 0.49                                                       | 0.00                           | 0.86                         | 0.49                                                    | 0.00                           | 0.86                         | 0.49                                                    |
| >1415                                 | hemA           | SAUR1790 (SAR_RS08950)  | 0.00                              | 0.20                            | 0.52                                                       | 0.00                           | 0.20                         | 0.59                                                    | 0.00                           | 0.20                         | 0.59                                                    |
| >1416                                 | engB<yhA       | SAUR1791 (SAR_RS08955)  | 0.00                              | 0.85                            | 0.17                                                       | 0.00                           | 0.85                         | 0.17                                                    | 0.00                           | 0.85                         | 0.17                                                    |
| >1417                                 | clpX           | SAUR1792 (SAR_RS08960)  | 0.00                              | 0.63                            | 0.08                                                       | 0.00                           | 0.63                         | 0.08                                                    | 0.00                           | 0.63                         | 0.08                                                    |
| >1418                                 | tig            | SAUR1793 (SAR_RS08965)  | 0.15                              | 0.92                            | 0.23                                                       | 0.15                           | 0.92                         | 0.23                                                    | 0.15                           | 0.92                         | 0.23                                                    |
| >1419                                 | ysaA           | SAUR1795 (SAR_RS08975)  | 0.00                              | 1.29                            | 0.32                                                       | 0.00                           | 1.29                         | 0.32                                                    | 0.00                           | 1.29                         | 0.32                                                    |
| >1420                                 | ymaB           | SAUR1796 (SAR_RS08980)  | 0.00                              | 0.66                            | 0.00                                                       | 0.16                           | 0.82                         | 0.16                                                    | 0.00                           | 0.66                         | 0.00                                                    |
| >1421                                 | rplT           | SAUR1798 (SAR_RS08990)  | >5.00                             | >5.00                           | >5.00                                                      | 0.28                           | 0.84                         | 0.28                                                    | 0.28                           | 0.84                         | 0.28                                                    |
| >1422                                 | rplM           | SAUR1799 (SAR_RS08995)  | 0.00                              | 0.00                            | 0.00                                                       | 0.00                           | 0.00                         | 0.00                                                    | 0.00                           | 0.00                         | 0.00                                                    |
| >1423                                 | hmcC           | SAUR1800 (SAR_RS09000)  | 0.00                              | 0.19                            | 0.00                                                       | 0.00                           | 0.19                         | 0.00                                                    | 0.00                           | 0.19                         | 0.00                                                    |
| >1424                                 | lysP1          | SAUR1801 (SAR_RS09005)  | 0.00                              | >5.00                           | 0.47                                                       | 0.13                           | >5.00                        | 0.60                                                    | 0.07                           | >5.00                        | 0.54                                                    |
| >1425                                 | thrS           | SAUR1802 (SAR_RS09010)  | 0.00                              | 1.65                            | 0.05                                                       | 0.00                           | 1.65                         | 0.05                                                    | 0.00                           | 1.65                         | 0.05                                                    |
| >1426                                 | dnal           | SAUR1804 (SAR_RS09020)  | 0.11                              | 0.33                            | 0.43                                                       | 0.11                           | 0.33                         | 0.43                                                    | 0.22                           | 0.43                         | 0.54                                                    |
| >1427                                 | dnab           | SAUR1805 (SAR_RS09025)  | 0.00                              | 0.79                            | 0.14                                                       | 0.07                           | 0.86                         | 0.21                                                    | 0.00                           | 0.79                         | 0.14                                                    |
| >1428                                 | rrdR           | SAUR1806 (SAR_RS09030)  | 0.00                              | 0.42                            | 0.21                                                       | 0.00                           | 0.42                         | 0.21                                                    | 0.00                           | 0.42                         | 0.21                                                    |
| >1429                                 | gspB           | SAUR1807 (SAR_RS09035)  | 0.00                              | 0.78                            | 0.29                                                       | 0.00                           | 0.78                         | 0.29                                                    | 0.00                           | 0.78                         | 0.29                                                    |
| >1430                                 | coqE           | SAUR1808 (SAR_RS09040)  | 0.00                              | 0.80                            | 0.32                                                       | 0.00                           | 0.80                         | 0.32                                                    | 0.16                           | 0.96                         | 0.48                                                    |
| >1431                                 | mutM           | SAUR1809 (SAR_RS09045)  | 0.00                              | 1.37                            | 0.34                                                       | 0.00                           | 1.37                         | 0.34                                                    | 0.00                           | 1.37                         | 0.34                                                    |
| >1432                                 | polA           | SAUR1810 (SAR_RS09050)  | 0.08                              | 0.91                            | 0.42                                                       | 0.00                           | 0.84                         | 0.34                                                    | 0.04                           | 0.87                         | 0.38                                                    |
| >1433                                 | Q2YTE9=DUF6056 | SAUR1811 (SAR_RS09055)  | 0.07                              | 1.68                            | 0.78                                                       | 0.13                           | 1.75                         | 0.94                                                    | 0.13                           | 1.75                         | 0.94                                                    |
| >1434                                 | phoR           | SAUR1812 (SAR_RS09060)  | 0.00                              | 1.68                            | 1.38                                                       | 0.00                           | 1.68                         | 1.38                                                    | 0.00                           | 1.68                         | 1.38                                                    |
| >1435                                 | phoP           | SAUR1813 (SAR_RS09065)  | 0.00                              | 0.43                            | 0.28                                                       | 0.00                           | 0.43                         | 0.28                                                    | 0.00                           | 0.43                         | 0.28                                                    |
| >1436                                 | chr<icd        | SAUR1815 (SAR_RS09075)  | 0.00                              | 0.79                            | 0.55                                                       | 0.00                           | 0.79                         | 0.55                                                    | 0.00                           | 0.79                         | 0.55                                                    |
| >1437                                 | chzP           | SAUR1816 (SAR_RS09080)  | 0.00                              | 0.89                            | 0.53                                                       | 0.00                           | 0.89                         | 0.62                                                    | 0.00                           | 0.89                         | 0.62                                                    |
| >1438                                 | cycA<aapA      | SAUR1817 (SAR_RS09085)  | 0.00                              | 0.95                            | 0.59                                                       | 0.00                           | 0.95                         | 0.59                                                    | 0.07                           | 1.03                         | 0.66                                                    |
| >1439                                 | pykA           | SAUR1818 (SAR_RS09090)  | 0.00                              | 0.57                            | 0.34                                                       | 0.00                           | 0.57                         | 0.34                                                    | 0.00                           | 0.57                         | 0.34                                                    |
| >1440                                 | prfA           | SAUR1819 (SAR_RS09095)  | 0.00                              | 0.31                            | 0.21                                                       | 0.00                           | 0.31                         | 0.21                                                    | 0.00                           | 0.31                         | 0.21                                                    |
| >1441                                 | accA           | SAUR1820 (SAR_RS09100)  | 0.11                              | 1.16                            | 0.32                                                       | 0.11                           | 1.16                         | 0.32                                                    | 0.00                           | 1.06                         | 0.21                                                    |
| >1442                                 | accD           | SAUR1821 (SAR_RS09105)  | 0.00                              | 0.70                            | 0.00                                                       | 0.00                           | 0.70                         | 0.00                                                    | 0.00                           | 0.70                         | 0.00                                                    |
| >1443                                 | mreB           | SAUR1822 (SAR_RS09110)  | 0.08                              | 0.90                            | 0.49                                                       | 0.00                           | 0.89                         | 0.41                                                    | 0.00                           | 0.98                         | 0.41                                                    |
| >1444                                 | dnaE           | SAUR1823 (SAR_RS09115)  | 0.03                              | 3.50                            | 2.78                                                       | 0.00                           | 3.47                         | 2.75                                                    | 0.00                           | 3.47                         | 2.75                                                    |
| >1445                                 | rrnA           | SAUR1824 (SAR_RS09120)  | 0.11                              | 2.23                            | 0.96                                                       | 0.00                           | 2.12                         | 0.85                                                    | 0.00                           | 2.12                         | 0.85                                                    |
| >1446                                 | ytol           | SAUR1825 (SAR_RS09125)  | 0.00                              | 1.00                            | 0.92                                                       | 0.00                           | 1.00                         | 0.92                                                    | 0.00                           | 1.00                         | 0.92                                                    |
| >1447                                 | uspA           | SAUR1826 (SAR_RS09130)  | 0.00                              | 0.24                            | 0.00                                                       | 0.00                           | 0.24                         | 0.00                                                    | 0.00                           | 0.24                         | 0.00                                                    |
| >1448                                 | ytKL           | SAUR1827 (SAR_RS09135)  | 0.00                              | 0.72                            | 1.01                                                       | 0.00                           | 0.72                         | 1.01                                                    | 0.00                           | 0.72                         | 1.01                                                    |
| >1449                                 | pepQ           | SAUR1828 (SAR_RS09140)  | 0.00                              | 2.79                            | 2.51                                                       | 0.00                           | 2.79                         | 2.51                                                    | 0.00                           | 2.79                         | 2.51                                                    |
| >1450                                 | pld2           | SAUR1830 (SAR_RS09150)  | 0.00                              | 0.54                            | 0.00                                                       | 0.00                           | 0.54                         | 0.00                                                    | 0.00                           | 0.63                         | 0.09                                                    |
| >1451                                 | yyzE           | SAUR1831 (SAR_RS09155)  | 0.00                              | 0.60                            | 0.20                                                       | 0.00                           | 0.60                         | 0.20                                                    | 0.00                           | 0.60                         | 0.20                                                    |
| >1452                                 | ackA           | SAUR1832 (SAR_RS09160)  | 0.00                              | 0.75                            | 0.33                                                       | 0.00                           | 0.75                         | 0.33                                                    | 0.08                           | 0.83                         | 0.42                                                    |
| >1453                                 | ytxK           | SAUR1833 (SAR_RS09165)  | 0.11                              | 0.74                            | >5.00                                                      | 0.11                           | 0.74                         | >5.00                                                   | 0.21                           | 0.84                         | >5.00                                                   |
| >1454                                 | tpx            | SAUR1834 (SAR_RS09170)  | 0.00                              | 1.21                            | 0.00                                                       | 0.00                           | 1.21                         | 0.00                                                    | 0.00                           | 1.21                         | 0.00                                                    |
| >1455                                 | ytmM           | SAUR1835 (SAR_RS09175)  | 0.13                              | 1.82                            | 0.00                                                       | 0.13                           | 1.82                         | 0.00                                                    | 0.13                           | 1.82                         | 0.00                                                    |
| >1456                                 | thiI           | SAUR1836 (SAR_RS09180)  | 0.00                              | 3.35                            | 2.37                                                       | 0.00                           | 3.35                         | 2.37                                                    | 0.00                           | 3.35                         | 2.37                                                    |
| >1457                                 | codZ<ics5      | SAUR1837 (SAR_RS09185)  | 0.00                              | 2.46                            | 0.00                                                       | 0.00                           | >5.00                        | 2.46                                                    | 0.00                           | >5.00                        | 2.46                                                    |
| >1458                                 | ozrA           | SAUR1839 (SAR_RS09195)  | 0.00                              | 0.88                            | 0.12                                                       | 0.00                           | 0.88                         | 0.12                                                    | 0.00                           | 0.88                         | 0.12                                                    |
| >1459                                 | ytSP<mnrC      | SAUR1840 (SAR_RS09200)  | 0.00                              | >5.00                           | 0.86                                                       | 0.00                           | >5.00                        | 0.86                                                    | 0.00                           | >5.00                        | 0.86                                                    |
| >1460                                 | rpsD           | SAUR1841 (SAR_RS09205)  | 0.00                              | 0.17                            | 0.17                                                       | 0.17                           | 0.33                         | 0.33                                                    | 0.17                           | 0.33                         | 0.33                                                    |
| >1461                                 | ugpQ2          | SAUR1843 (SAR_RS09215)  | 0.00                              | 1.08                            | 0.54                                                       | 0.00                           | 1.08                         | 0.54                                                    | 0.00                           | 1.08                         | 0.54                                                    |
| >1462                                 | osmC           | SAUR1844 (SAR_RS09220)  | 0.22                              | 1.34                            | 0.45                                                       | 0.00                           | 1.12                         | 0.22                                                    | 0.00                           | 1.12                         | 0.22                                                    |
| >1463                                 | pucG           | (N/A)                   | 0.09                              | 1.21                            | 0.69                                                       | 0.00                           | 1.12                         | 0.60                                                    | 0.00                           | 1.12                         | 0.60                                                    |
| >1464                                 | serA           | SAUR1846 (SAR_RS09230)  | 0.06                              | 0.87                            | 0.62                                                       | 0.00                           | 0.81                         | 0.56                                                    | 0.00                           | 0.81                         | 0.56                                                    |
| >1465                                 | QSHF49         | SAUR1848 (SAR_RS09240)  | 0.00                              | 0.62                            | 0.27                                                       | 0.00                           | 0.62                         | 0.27                                                    | 0.00                           | 0.62                         | 0.27                                                    |
| >1466                                 | nagE           | SAUR1849 (SAR_RS09245)  | 0.07                              | 1.50                            | 0.75                                                       | 0.00                           | 1.43                         | 0.68                                                    | 0.07                           | 1.50                         | 0.75                                                    |
| >1467                                 | plcC           | SAUR1850 (SAR_RS09250)  | 0.00                              | 0.32                            | 0.97                                                       | 0.00                           | 0.32                         | 0.97                                                    | 0.00                           | 0                            |                                                         |

| Number/<br>Position in<br>the figures | Gene ID          | ID in PubMLST cg scheme | ED133 vs. swan<br>isolate 15V8707 | X22 vs. swan isolate<br>15V8707 | CC522 goat isolate<br>17CS1042 vs. swan<br>isolate 15V8707 | ED133 vs. duck<br>isolate V315 | X22 vs. duck isolate<br>V315 | CC522 goat isolate<br>17CS1042 vs. duck<br>isolate V315 | ED133 vs. duck<br>isolate V482 | X22 vs. duck isolate<br>V482 | CC522 goat isolate<br>17CS1042 vs. duck<br>isolate V482 |
|---------------------------------------|------------------|-------------------------|-----------------------------------|---------------------------------|------------------------------------------------------------|--------------------------------|------------------------------|---------------------------------------------------------|--------------------------------|------------------------------|---------------------------------------------------------|
| >1518                                 | QSHEZ5-sdpA_core | (N/A)                   | 0.00                              | 1.10                            | 1.89                                                       | 0.00                           | 1.10                         | 1.89                                                    | 0.00                           | 1.10                         | 1.89                                                    |
| >1519                                 | tal              | SAUR1913 (SAR_RS09565)  | 0.00                              | 0.56                            | 0.70                                                       | 0.00                           | 0.56                         | 0.70                                                    | 0.00                           | 0.70                         | 0.84                                                    |
| >1520                                 | Q7A500           | SAUR1914 (SAR_RS09570)  | 0.33                              | 2.31                            | 1.65                                                       | 0.00                           | 1.98                         | 1.32                                                    | 0.00                           | 1.98                         | 1.32                                                    |
| >1521                                 | crbB1            | SAUR1915 (SAR_RS09575)  | 0.00                              | 1.13                            | 0.45                                                       | 0.00                           | 1.13                         | 0.45                                                    | 0.00                           | 1.13                         | 0.45                                                    |
| >1522                                 | crbB2            | SAUR1916 (SAR_RS09580)  | 0.00                              | 2.82                            | 2.26                                                       | 0.00                           | 2.82                         | 2.26                                                    | 0.00                           | 2.82                         | 2.26                                                    |
| >1523                                 | ytbE-yyvgH       | SAUR1917 (SAR_RS09585)  | 0.00                              | 0.84                            | 1.44                                                       | 0.00                           | 0.84                         | 1.44                                                    | 0.00                           | 0.84                         | 1.44                                                    |
| >1524                                 | nrd              | SAUR1918 (SAR_RS09590)  | 0.00                              | 0.99                            | 0.77                                                       | 0.00                           | 0.99                         | 0.77                                                    | 0.11                           | 1.10                         | 0.88                                                    |
| >1525                                 | metK             | SAUR1919 (SAR_RS09595)  | 0.00                              | 0.84                            | 0.17                                                       | 0.00                           | 0.84                         | 0.17                                                    | 0.00                           | 0.84                         | 0.17                                                    |
| >1526                                 | pckA             | SAUR1920 (SAR_RS09600)  | 0.00                              | 0.69                            | 0.75                                                       | 0.00                           | 0.69                         | 0.75                                                    | 0.06                           | 0.75                         | 0.82                                                    |
| >1527                                 | ytmA             | SAUR1921 (SAR_RS09605)  | 0.00                              | 3.63                            | 3.50                                                       | 0.00                           | 3.63                         | 3.50                                                    | 0.00                           | 3.63                         | 3.50                                                    |
| >1528                                 | typhH-nudH-ytykD | SAUR1922 (SAR_RS09610)  | 0.00                              | 0.42                            | 0.39                                                       | 0.00                           | 0.42                         | 0.42                                                    | 0.00                           | 0.42                         | 0.42                                                    |
| >1529                                 | ytlA-ytlD        | SAUR1923 (SAR_RS09615)  | 0.00                              | 0.42                            | 0.39                                                       | 0.00                           | 0.39                         | 0.39                                                    | 0.00                           | 0.39                         | 0.39                                                    |
| >1530                                 | menC             | SAUR1924 (SAR_RS09620)  | 0.00                              | 2.50                            | 2.79                                                       | 0.00                           | 2.50                         | 2.79                                                    | 0.00                           | 2.50                         | 2.79                                                    |
| >1531                                 | menE             | SAUR1925 (SAR_RS09625)  | 0.00                              | 2.57                            | 1.42                                                       | 0.00                           | 2.57                         | 1.42                                                    | 0.00                           | 2.57                         | 1.42                                                    |
| >1532                                 | QSHEY1-DUF4909   | SAUR1926 (SAR_RS09630)  | 0.00                              | 1.24                            | 2.48                                                       | 0.00                           | 1.24                         | 2.48                                                    | 0.00                           | 1.24                         | 2.48                                                    |
| >1533                                 | QSHEY0-yokF      | SAUR1927 (SAR_RS09635)  | 0.15                              | 4.61                            | 0.31                                                       | 0.00                           | 4.45                         | 0.15                                                    | 0.00                           | 4.45                         | 0.15                                                    |
| >1534                                 | DUF4352          | SAUR1928 (SAR_RS09640)  | 0.00                              | 3.31                            | 1.20                                                       | 0.10                           | 3.41                         | 1.31                                                    | 0.00                           | 3.31                         | 1.20                                                    |
| >1535                                 | QSHEX0           | (N/A)                   | 0.00                              | >5.00                           | 3.03                                                       | 0.00                           | >5.00                        | 3.03                                                    | 0.00                           | >5.00                        | 3.03                                                    |
| >1536                                 | QSHEX7-DUF3969   | (N/A)                   | 0.00                              | >5.00                           | 1.16                                                       | 0.00                           | >5.00                        | 1.16                                                    | 0.00                           | >5.00                        | 1.16                                                    |
| >1537                                 | ASITW8           | (N/A)                   | 0.00                              | >5.00                           | >5.00                                                      | 0.00                           | >5.00                        | >5.00                                                   | 0.00                           | >5.00                        | >5.00                                                   |
| >1539                                 | hdsS-spl         | (N/A)                   | 0.00                              | >5.00                           | >5.00                                                      | 0.00                           | >5.00                        | >5.00                                                   | 0.00                           | >5.00                        | >5.00                                                   |
| >1540                                 | hdsM-spl         | (N/A)                   | 1.28                              | 4.69                            | 4.56                                                       | 0.26                           | 4.05                         | 4.11                                                    | 0.19                           | 4.11                         | 4.05                                                    |
| >1541                                 | splF             | (N/A)                   | 0.00                              | 4.58                            | 2.36                                                       | 0.00                           | 4.58                         | 2.36                                                    | 0.00                           | 4.58                         | 2.36                                                    |
| >1543                                 | splD2            | (N/A)                   | 0.00                              | 0.00                            | >5.00                                                      | 0.00                           | 0.00                         | >5.00                                                   | 0.00                           | 0.00                         | >5.00                                                   |
| >1545                                 | spcC             | (N/A)                   | 0.00                              | >5.00                           | >5.00                                                      | 0.00                           | >5.00                        | >5.00                                                   | 0.00                           | >5.00                        | >5.00                                                   |
| >1546                                 | splB             | (N/A)                   | 0.14                              | >5.00                           | 2.35                                                       | 0.00                           | >5.00                        | 2.35                                                    | 0.14                           | >5.00                        | 2.49                                                    |
| >1547                                 | splA             | (N/A)                   | 0.00                              | 2.54                            | 0.42                                                       | 0.00                           | 2.54                         | 0.42                                                    | 0.00                           | 2.54                         | 0.42                                                    |
| >1548                                 | Q2FXD0-rear2     | (N/A)                   | 0.00                              | >5.00                           | >5.00                                                      | 0.00                           | >5.00                        | >5.00                                                   | 0.00                           | >5.00                        | >5.00                                                   |
| >1549                                 | epiG-bsaG        | (N/A)                   | 0.00                              | 2.29                            | >5.00                                                      | 0.00                           | 2.29                         | >5.00                                                   | 0.00                           | 2.29                         | >5.00                                                   |
| >1550                                 | epiE             | (N/A)                   | 0.00                              | >5.00                           | >5.00                                                      | 0.00                           | >5.00                        | >5.00                                                   | 0.00                           | >5.00                        | >5.00                                                   |
| >1551                                 | epiF             | (N/A)                   | 0.00                              | 4.62                            | >5.00                                                      | 0.00                           | 4.62                         | >5.00                                                   | 0.00                           | 4.62                         | >5.00                                                   |
| >1552                                 | epiP             | (N/A)                   | 0.00                              | 4.22                            | >5.00                                                      | 0.00                           | 4.22                         | >5.00                                                   | 0.00                           | 4.22                         | >5.00                                                   |
| >1553                                 | epiD             | (N/A)                   | 0.00                              | >5.00                           | >5.00                                                      | 0.00                           | >5.00                        | >5.00                                                   | 0.00                           | >5.00                        | >5.00                                                   |
| >1554                                 | epiC             | (N/A)                   | 0.08                              | >5.00                           | >5.00                                                      | 0.08                           | >5.00                        | >5.00                                                   | 0.08                           | >5.00                        | >5.00                                                   |
| >1555                                 | epiB             | (N/A)                   | 0.10                              | 3.74                            | >5.00                                                      | 0.07                           | 3.70                         | >5.00                                                   | 0.10                           | 3.74                         | >5.00                                                   |
| >1556                                 | epiA-bstA1       | (N/A)                   | 0.00                              | 0.00                            | >5.00                                                      | 0.00                           | 0.00                         | >5.00                                                   | 0.00                           | 0.00                         | >5.00                                                   |
| >1557                                 | bsaX             | (N/A)                   | 0.00                              | >5.00                           | >5.00                                                      | 0.00                           | >5.00                        | >5.00                                                   | 0.00                           | >5.00                        | >5.00                                                   |
| >1558                                 | lukD             | (N/A)                   | 0.00                              | 1.93                            | 1.73                                                       | 0.00                           | 1.93                         | 1.73                                                    | 0.00                           | 1.93                         | 1.73                                                    |
| >1559                                 | lukE             | (N/A)                   | 0.00                              | 2.35                            | 1.71                                                       | 0.00                           | 4.06                         | >5.00                                                   | 0.00                           | >5.00                        | >5.00                                                   |
| >1560                                 | ASU1Z57          | (N/A)                   | 0.00                              | 0.84                            | 0.42                                                       | 0.00                           | 0.84                         | 0.42                                                    | 0.00                           | 0.84                         | 0.42                                                    |
| >1561                                 | Q7A4X2-DUF1828   | (N/A)                   | 0.00                              | 1.54                            | 0.13                                                       | 0.00                           | 1.54                         | 0.13                                                    | 0.00                           | 1.54                         | 0.13                                                    |
| >1568                                 | ydeN             | SAUR1973 (SAR_RS09865)  | 0.00                              | 1.62                            | 0.90                                                       | 0.00                           | 1.62                         | 0.90                                                    | 0.00                           | 1.62                         | 0.90                                                    |
| >1569                                 | hemY-hemG        | SAUR1975 (SAR_RS09875)  | >5.00                             | 2.86                            | 0.79                                                       | >5.00                          | 2.78                         | 0.71                                                    | >5.00                          | 2.86                         | 0.79                                                    |
| >1570                                 | hemH             | SAUR1976 (SAR_RS09880)  | 0.00                              | 1.41                            | 0.65                                                       | 0.00                           | 1.41                         | 0.65                                                    | 0.00                           | 1.41                         | 0.65                                                    |
| >1571                                 | hemE             | SAUR1977 (SAR_RS09885)  | 0.00                              | 0.77                            | 0.19                                                       | 0.10                           | 0.87                         | 0.29                                                    | 0.10                           | 0.87                         | 0.29                                                    |
| >1572                                 | trfJ             | SAUR1979 (SAR_RS09895)  | 0.00                              | 0.60                            | 0.60                                                       | 0.00                           | >5.00                        | 0.60                                                    | 0.00                           | >5.00                        | 0.60                                                    |
| >1573                                 | ecsB             | SAUR1980 (SAR_RS09900)  | 0.08                              | 2.21                            | 1.14                                                       | 0.08                           | 2.21                         | 1.14                                                    | 0.08                           | 2.21                         | 1.14                                                    |
| >1574                                 | ecsA             | SAUR1981 (SAR_RS09905)  | 0.13                              | 1.21                            | 0.27                                                       | 0.13                           | 1.21                         | 0.27                                                    | 0.27                           | 1.35                         | 0.40                                                    |
| >1575                                 | hit              | SAUR1982 (SAR_RS09910)  | 0.00                              | 0.24                            | 0.00                                                       | 0.00                           | 0.24                         | 0.00                                                    | 0.00                           | 0.24                         | 0.00                                                    |
| >1576                                 | gvpP             | SAUR1983 (SAR_RS09915)  | 0.00                              | 0.27                            | 1.09                                                       | 0.00                           | 0.27                         | 1.09                                                    | 0.00                           | 0.27                         | 1.09                                                    |
| >1577                                 | yhaJ             | SAUR1984 (SAR_RS09920)  | 0.00                              | 0.54                            | 1.08                                                       | 0.00                           | 0.54                         | 1.08                                                    | 0.00                           | 0.54                         | 1.08                                                    |
| >1578                                 | prsA2            | SAUR1985 (SAR_RS09925)  | 0.00                              | 0.93                            | 0.00                                                       | 0.00                           | 0.93                         | 0.00                                                    | 0.00                           | 0.93                         | 0.00                                                    |
| >1579                                 | dbr-yhaM         | SAUR1986 (SAR_RS09930)  | 0.11                              | 0.74                            | 0.64                                                       | 0.00                           | 0.64                         | 0.53                                                    | 0.00                           | 0.64                         | 0.53                                                    |
| >1580                                 | QSHE72           | SAUR1987 (SAR_RS09935)  | 0.00                              | 0.65                            | 0.34                                                       | 0.00                           | 0.65                         | 0.34                                                    | 0.00                           | 0.65                         | 0.37                                                    |
| >1581                                 | QSHE71-yhaO      | SAUR1988 (SAR_RS09940)  | 0.08                              | 0.58                            | 0.25                                                       | 0.00                           | 0.50                         | 0.17                                                    | 0.00                           | 0.50                         | 0.17                                                    |
| >1582                                 | UPF0342          | SAUR1990 (SAR_RS09950)  | 0.00                              | 0.29                            | 0.00                                                       | 0.00                           | 0.29                         | 0.00                                                    | 0.00                           | 0.29                         | 0.00                                                    |
| >1583                                 | UPF0754-DUF0445  | SAUR1991 (SAR_RS09955)  | 0.00                              | 0.98                            | 0.98                                                       | 0.09                           | 1.07                         | 1.07                                                    | 0.09                           | 1.07                         | 1.07                                                    |
| >1584                                 | xdrA             | SAUR1992 (SAR_RS09960)  | 0.00                              | 0.22                            | 0.00                                                       | 0.00                           | 0.22                         | 0.00                                                    | 0.00                           | 0.22                         | 0.00                                                    |
| >1585                                 | alkR-rvraR-yhcR  | SAUR1993 (SAR_RS09965)  | 0.16                              | 0.16                            | 0.16                                                       | 0.16                           | 0.16                         | 0.16                                                    | 0.32                           | 0.32                         | 0.32                                                    |
| >1586                                 | alkR-rvraS-yhcS  | SAUR1994 (SAR_RS09970)  | 0.00                              | 0.81                            | 0.54                                                       | 0.00                           | 0.81                         | 0.54                                                    | 0.00                           | 0.81                         | 0.54                                                    |
| >1587                                 | rluA2            | SAUR1995 (SAR_RS09975)  | 0.00                              | 0.49                            | 1.46                                                       | 0.00                           | 0.49                         | 1.46                                                    | 0.00                           | 0.49                         | 1.46                                                    |
| >1588                                 | fumC-citG        | SAUR1996 (SAR_RS09980)  | 0.00                              | 0.79                            | 0.29                                                       | 0.00                           | 0.79                         | 0.29                                                    | 0.00                           | 0.79                         | 0.29                                                    |
| >1589                                 | QSHE53           | SAUR1997 (SAR_RS09985)  | 0.00                              | 0.25                            | 0.00                                                       | 0.00                           | 0.25                         | 0.00                                                    | 0.00                           | 0.25                         | 0.00                                                    |
| >1590                                 | QSHE51           | SAUR1999 (SAR_RS09995)  | 0.00                              | 1.31                            | 0.65                                                       | 0.00                           | 1.31                         | 0.65                                                    | 0.00                           | 1.31                         | 0.65                                                    |
| >1591                                 | QSHE50           | SAUR2000 (SAR_RS10000)  | 0.00                              | 0.83                            | 0.17                                                       | 0.00                           | 0.83                         | 0.17                                                    | 0.00                           | 0.83                         | 0.17                                                    |
| >1592                                 | cspR-trmL        | SAUR2001 (SAR_RS10005)  | 0.00                              | 0.62                            | 0.21                                                       | 0.00                           | 0.62                         | 0.21                                                    | 0.00                           | 0.62                         | 0.21                                                    |
| >1593                                 | queB             | SAUR2002 (SAR_RS10010)  | 0.00                              | 0.68                            | 0.27                                                       | 0.00                           | 0.68                         | 0.27                                                    | 0.00                           | 0.68                         | 0.27                                                    |
| >1594                                 | atrB-glnQ        | SAUR2003 (SAR_RS10015)  | 0.00                              | 0.69                            | 0.14                                                       | 0.00                           | 0.69                         | 0.14                                                    | 0.00                           | 0.69                         | 0.14                                                    |
| >1595                                 | artQ             | SAUR2004 (SAR_RS10020)  | 0.00                              | 0.69                            | 0.34                                                       | 0.00                           | 0.69                         | 0.34                                                    | 0.00                           | 0.69                         | 0.34                                                    |
| >1596                                 | Q1Y9N4           | SAUR2005 (SAR_RS10025)  | 0.00                              | >5.00                           | 0.47                                                       | 0.00                           | >5.00                        | 0.47                                                    | 0.09                           | >5.00                        | 0.56                                                    |
| >1597                                 | perR             | SAUR2036 (SAR_RS10180)  | 0.00                              | 0.22                            | 0.22                                                       | 0.22                           | 0.45                         | 0.45                                                    | 0.22                           | 0.45                         | 0.45                                                    |
| >1598                                 | QSHER2-ghrB2     | SAUR2037 (SAR_RS10185)  | 0.00                              | 2.00                            | 1.26                                                       | 0.00                           | 2.00                         | 1.26                                                    | 0.00                           | 2.00                         | 1.26                                                    |
| >1599                                 | bcp              | SAUR2038 (SAR_RS10190)  | 0.00                              | 0.66                            | >5.00                                                      | 0.00                           | 0.66                         | >5.00                                                   | 0.00                           | 0.66                         | >5.00                                                   |
| >1600                                 | gspB-hemL        | SAUR2039 (SAR_RS10195)  | 0.00                              | 1.24                            | 0.47                                                       | 0.00                           | 1.24                         | 0.47                                                    | 0.00                           | 1.24                         | 0.47                                                    |
| >1601                                 | DUF0939-L1       | SAUR2040 (SAR_RS10200)  | 0.00                              | 0.37                            | 0.09                                                       | 0.00                           | 0.27                         | 0.09                                                    | 0.00                           | 0.27                         | 0.09                                                    |
| >1602                                 | msbA2            | SAUR2042 (SAR_RS10210)  | 0.06                              | 1.04                            | 0.35                                                       | 0.12                           | 1.09                         | 0.40                                                    | 0.06                           | 1.04                         | 0.35                                                    |
| >1603                                 | DUF0402          | SAUR2043 (SAR_RS10215)  | 0.00                              | 0.18                            | 0.00                                                       | 0.00                           | 0.18                         | 0.00                                                    | 0.00                           | 0.18                         | 0.00                                                    |
| >1604                                 | mutY             | SAUR2044 (SAR_RS10220)  | 0.10                              | 1.64                            | 0.87                                                       | 0.10                           | 1.64                         | 0.87                                                    | 0.10                           | 1.64                         | 0.87                                                    |
| >1605                                 | DUF0457          | SAUR2045 (SAR_RS10225)  | 0.00                              | 0.10                            | 0.00                                                       | 0.20                           | 0.31                         | 0.20                                                    | 0.20                           | 0.31                         | 0.20                                                    |
| >1606                                 | tagG             | SAUR2047 (SAR_RS10235)  | 0.24                              | 0.72                            | 0.12                                                       | 0.24                           | 0.72                         | 0.12                                                    | 0.24                           | 0.72                         | 0.12                                                    |
| >1607                                 | tagH             | SAUR2048 (SAR_RS10240)  | 0.07                              | 0.53                            | 0.46                                                       | 0.00                           | 0.59                         | 0.40                                                    | 0.00                           | 0.59                         | 0.40                                                    |
| >1608                                 | yhlH             | SAUR2049 (SAR_RS10245)  | 0.00                              | 0.32                            | 0.32                                                       | 0.00                           | 0.32                         | 0.00                                                    | 0.00                           | 0.32                         | 0.00                                                    |
| >1609                                 | recX             | SAUR2050 (SAR_RS10250)  | 0.00                              | >5.00                           | >5.00                                                      | 0.00                           | >5.00                        | >5.00                                                   | 0.00                           | >5.00                        | >5.00                                                   |
| >1610                                 | sgtB             | SAUR2051 (SAR_RS10255)  | 0.12                              | 0.74                            | 0.12                                                       | 0.00                           | 0.62                         | 0.00                                                    | 0.12                           | 0.74                         | 0.12                                                    |
| >1611                                 | ptpI             | SAUR2052 (SAR_RS10260)  | 0.00                              | 0.00                            | 0.19                                                       | 0.00                           | 0.00                         | 0.19                                                    | 0.00                           | 0.00                         | 0.19                                                    |
| >1612                                 | QSHEP8           | SAUR2053 (SAR_RS10265)  | 0.00                              | 1.85                            | 0.00                                                       | 0.00                           | 1.85                         | 0.00                                                    | 0.00                           | 1.85                         | 0.00                                                    |
| >1613                                 | ASU43-yyrAB      | SAUR2054 (SAR_RS10270)  | 1.99                              | 0.98                            | >5.00                                                      | 1.99                           | 0.78                         | >5.00                                                   | 2.08                           | 0.87                         | >5.00                                                   |
| >1614                                 | ASU44            | SAUR2055 (SAR_RS10275)  | 0.00                              | 0.94                            | 0.94                                                       | 0.00                           | 0.94                         | 0.94                                                    | 0.00                           | 0.94                         | 0.94                                                    |
| >1615                                 | ampS-mpgS        | SAUR2056 (SAR_RS10280)  | 0.00                              | 1.04                            | 1.04                                                       | 1.04                           | 1.04                         | 1.04                                                    | 0.00                           | 1.04                         | 1.04                                                    |
| >1616                                 | QSHEP4-DUF1128   | SAUR2057 (SAR_RS10285)  | 0.00                              | 0.97                            | 0.97                                                       | 0.00                           | 0.97                         | 0.97                                                    | 0.00                           | 0.97                         | 0.97                                                    |
| >1617                                 | ptpA             | SAUR2058 (SAR_RS10290)  | 0.00                              | 0.22                            | 0.00                                                       | 0.00                           | 0.22                         | 0.22                                                    | 0.00                           | 0.22                         | 0.22                                                    |
| >1618                                 | QSHEP2           | SAUR2059 (SAR_RS10295)  | 0.00                              | 0.36                            | 0.00                                                       | 0.00                           | 0.36                         | 0.00                                                    | 0.00                           | 0.36                         | 0.00                                                    |
| >1619                                 | rhn              | SAUR2060 (SAR_RS10300)  | 0.00                              | 0.90                            | 1.23                                                       | 0.00                           | 0.90                         | 1.23                                                    | 0.00                           | 0.90                         | 1.23                                                    |
| >1620                                 | vraT             | SAUR2061 (SAR_RS10305)  | 0.00                              | 0.32                            | 0.00                                                       | 0.00                           | 0.32                         | 0.00                                                    | 0.00                           | 0.32                         | 0.00                                                    |
| >1621                                 | vraE             | SAUR2062 (SAR_RS10310)  | 0.00                              | 0.29                            | 0.57                                                       | 0.00                           | 0.29                         | 0.57                                                    | 0.00                           | 0.38                         | 0.67                                                    |
| >1622                                 | vraJ-llaF        | SAUR2063 (SAR_RS10315)  | 0.00                              | 0.43                            | 0.57                                                       | 0.00                           | 0.57                         | 0.43                                                    | 0.00                           | 0.57                         | 0.43                                                    |
| >1623                                 | vraU             | SAUR2064 (SAR_RS10320)  | 0.00                              | 0.78                            | 0.52                                                       | 0.00                           | 0.78                         | 0.52                                                    | 0.00                           | 0.78                         | 0.52                                                    |
| >1624                                 | ampM             | SAUR2065 (SAR_RS10325)  | 0.00                              | 1.05                            | 0.13                                                       | 0.00                           | 1.05                         | 0.13</                                                  |                                |                              |                                                         |

| Number/<br>Position in<br>the figures | Gene ID     | ID in PubMLST cg scheme | ED133 vs. swan<br>isolate 15V8707 | X22 vs. swan isolate<br>15V8707 | CC522 goat isolate<br>17CS1042 vs. swan<br>isolate 15V8707 | ED133 vs. duck<br>isolate V315 | X22 vs. duck isolate<br>V315 | CC522 goat isolate<br>17CS1042 vs. duck<br>isolate V315 | ED133 vs. duck<br>isolate V482 | X22 vs. duck isolate<br>V482 | CC522 goat isolate<br>17CS1042 vs. duck<br>isolate V482 |
|---------------------------------------|-------------|-------------------------|-----------------------------------|---------------------------------|------------------------------------------------------------|--------------------------------|------------------------------|---------------------------------------------------------|--------------------------------|------------------------------|---------------------------------------------------------|
| >1675                                 | lukK-lukG   | SAUR2191 (SAR_RS10955)  | 0.10                              | 4.33                            | 0.49                                                       | 0.00                           | 4.23                         | 0.39                                                    | 0.00                           | 4.23                         | 0.39                                                    |
| >1676                                 | lukY-lukH   | SAUR2192 (SAR_RS10960)  | 0.00                              | 1.70                            | 0.38                                                       | 0.00                           | 1.70                         | 0.38                                                    | 0.09                           | 1.79                         | 0.47                                                    |
| >1677                                 | dapE        | SAUR2193 (SAR_RS10965)  | 0.00                              | 0.65                            | 0.25                                                       | 0.00                           | 0.65                         | 0.25                                                    | 0.00                           | 0.65                         | 0.25                                                    |
| >1678                                 | atrB        | SAUR2194 (SAR_RS10970)  | 0.00                              | 1.07                            | 0.23                                                       | 0.00                           | 1.07                         | 0.23                                                    | 0.00                           | 1.07                         | 0.23                                                    |
| >1679                                 | grol-igroEL | SAUR2199 (SAR_RS10995)  | 0.00                              | 3.28                            | 1.48                                                       | 0.00                           | 3.28                         | 1.48                                                    | 0.00                           | 3.28                         | 1.48                                                    |
| >1680                                 | groS        | SAUR2200 (SAR_RS11000)  | 0.00                              | 1.40                            | 0.70                                                       | 0.00                           | 1.40                         | 0.70                                                    | 0.00                           | 1.40                         | 0.70                                                    |
| >1681                                 | ydIL-mroQ   | SAUR2201 (SAR_RS11005)  | 0.00                              | >=5.00                          | 1.21                                                       | 0.00                           | >=5.00                       | 1.21                                                    | 0.13                           | >=5.00                       | 1.34                                                    |
| >1682                                 | sdriH       | SAUR2202 (SAR_RS11010)  | 0.08                              | >=5.00                          | 4.80                                                       | 3.12                           | 4.40                         | >=5.00                                                  | 3.20                           | 4.48                         | >=5.00                                                  |
| >1683                                 | QSHG68      | SAUR3001                | 0.16                              | 2.71                            | 2.55                                                       | 0.16                           | 2.71                         | 2.55                                                    | 0.00                           | 2.55                         | 2.39                                                    |
| >1684                                 | mtmU-ramA   | SAUR2204 (SAR_RS11020)  | 0.00                              | 0.64                            | 0.51                                                       | 0.00                           | 0.64                         | 0.51                                                    | 0.13                           | 0.76                         | 0.64                                                    |
| >1685                                 | hid         | SAUR3002 (hid)          | 0.00                              | 0.74                            | 0.74                                                       | 0.00                           | 0.74                         | 0.74                                                    | 0.00                           | 0.74                         | 0.74                                                    |
| >1686                                 | agrB-I      | SAUR2953 (agrB)         | 0.00                              | 2.63                            | 0.00                                                       | 0.00                           | 2.63                         | 0.00                                                    | 0.00                           | 2.63                         | 0.00                                                    |
| >1687                                 | agrD-I      | SAUR2956 (agrD3)        | 0.00                              | 0.00                            | 0.00                                                       | 0.00                           | 0.00                         | 0.00                                                    | 0.00                           | 0.00                         | 0.00                                                    |
| >1688                                 | agrC-I      | SAUR2958 (agrC)         | 0.00                              | >=5.00                          | 0.08                                                       | 0.00                           | >=5.00                       | 0.08                                                    | 0.00                           | >=5.00                       | 0.08                                                    |
| >1689                                 | agrA        | SAUR2959 (agrA)         | 0.00                              | 0.84                            | 0.00                                                       | 0.00                           | 0.84                         | 0.00                                                    | 0.00                           | 0.84                         | 0.00                                                    |
| >1690                                 | scrK-frk    | SAUR2210 (SAR_RS11050)  | 0.00                              | 1.15                            | 0.42                                                       | 0.00                           | 1.15                         | 0.42                                                    | 0.10                           | 1.25                         | 0.52                                                    |
| >1691                                 | scrB        | SAUR2211 (SAR_RS11055)  | 0.00                              | 1.28                            | 0.67                                                       | 0.00                           | 1.28                         | 0.67                                                    | 0.07                           | 1.35                         | 0.74                                                    |
| >1692                                 | scrR        | SAUR2212 (SAR_RS11060)  | 0.11                              | 1.07                            | 0.53                                                       | 0.00                           | 1.27                         | 0.42                                                    | 0.00                           | 1.07                         | 0.42                                                    |
| >1693                                 | nrgA        | SAUR2213 (SAR_RS11065)  | 0.00                              | 3.60                            | 0.96                                                       | 0.00                           | 3.52                         | 0.88                                                    | 0.16                           | 3.68                         | 1.04                                                    |
| >1694                                 | QSHF7-tusA  | SAUR2214 (SAR_RS11070)  | 0.00                              | >=5.00                          | 0.40                                                       | 0.00                           | >=5.00                       | 0.40                                                    | 0.00                           | >=5.00                       | 0.40                                                    |
| >1695                                 | yeeE-DUF395 | SAUR2215 (SAR_RS11075)  | 0.00                              | 1.40                            | 0.47                                                       | 0.00                           | 1.40                         | 0.47                                                    | 0.00                           | 1.40                         | 0.47                                                    |
| >1696                                 | rex         | SAUR2216 (SAR_RS11080)  | 0.00                              | 0.16                            | 0.47                                                       | 0.00                           | 0.16                         | 0.47                                                    | 0.00                           | 0.16                         | 0.47                                                    |
| >1697                                 | yheS        | SAUR2217 (SAR_RS11085)  | 0.00                              | 0.78                            | 0.26                                                       | 0.00                           | 0.78                         | 0.26                                                    | 0.05                           | 0.83                         | 0.31                                                    |
| >1698                                 | mutS3       | SAUR3003                | 0.00                              | 1.74                            | 0.87                                                       | 0.06                           | 1.80                         | 0.93                                                    | 0.06                           | 1.80                         | 0.93                                                    |
| >1699                                 | tsaD-gcp    | SAUR2220 (SAR_RS11100)  | 0.10                              | 0.50                            | 0.68                                                       | 0.00                           | >=5.00                       | 0.68                                                    | 0.10                           | >=5.00                       | 0.68                                                    |
| >1700                                 | rmiI        | SAUR2221 (SAR_RS11105)  | 0.00                              | 0.86                            | 0.43                                                       | 0.00                           | 0.86                         | 0.43                                                    | 0.00                           | 0.86                         | 0.43                                                    |
| >1701                                 | tsaB        | SAUR2222 (SAR_RS11110)  | 0.00                              | 1.06                            | 0.15                                                       | 0.00                           | 1.06                         | 0.15                                                    | 0.30                           | 1.06                         | 0.45                                                    |
| >1702                                 | tsaE-ryjeE  | (N/A)                   | 0.00                              | 1.15                            | 0.00                                                       | 0.23                           | 1.38                         | 0.23                                                    | 0.23                           | 1.38                         | 0.23                                                    |
| >1703                                 | ilvD        | SAUR2225 (SAR_RS11125)  | 0.06                              | 1.12                            | 0.30                                                       | 0.12                           | 1.18                         | 0.36                                                    | 0.12                           | 1.18                         | 0.36                                                    |
| >1704                                 | ilvB        | SAUR2226 (SAR_RS11130)  | 0.06                              | 0.73                            | 0.73                                                       | 0.06                           | 0.73                         | 0.73                                                    | 0.06                           | 0.73                         | 0.73                                                    |
| >1705                                 | ilvH        | SAUR2227 (SAR_RS11135)  | 0.39                              | 2.35                            | 0.39                                                       | 0.39                           | 2.35                         | 0.39                                                    | 0.39                           | 2.35                         | 0.39                                                    |
| >1706                                 | ilvC        | SAUR2228 (SAR_RS11140)  | 0.00                              | 0.50                            | 0.20                                                       | 0.00                           | 0.50                         | 0.20                                                    | 0.00                           | 0.50                         | 0.20                                                    |
| >1707                                 | leuA1       | SAUR2229 (SAR_RS11145)  | 0.00                              | 0.46                            | >=5.00                                                     | 0.00                           | 0.46                         | >=5.00                                                  | 0.00                           | 0.46                         | >=5.00                                                  |
| >1708                                 | leuB        | SAUR2230 (SAR_RS11150)  | 0.10                              | 1.05                            | 0.19                                                       | 0.10                           | 1.05                         | 0.19                                                    | 0.10                           | 1.05                         | 0.19                                                    |
| >1709                                 | leuC        | SAUR2231 (SAR_RS11155)  | 0.00                              | 1.24                            | 0.22                                                       | 0.00                           | 1.24                         | 0.22                                                    | 0.00                           | 1.24                         | 0.22                                                    |
| >1710                                 | leuD        | SAUR2232 (SAR_RS11160)  | 0.00                              | >=5.00                          | 0.70                                                       | 0.00                           | >=5.00                       | 0.70                                                    | 0.00                           | >=5.00                       | 0.70                                                    |
| >1711                                 | ilvA2       | SAUR2233 (SAR_RS11165)  | 0.00                              | 2.99                            | 0.47                                                       | 0.00                           | 2.99                         | 0.47                                                    | 0.00                           | 2.99                         | 0.47                                                    |
| >1712                                 | sprC        | SAUR2240 (SAR_RS11200)  | 0.00                              | 1.54                            | 1.10                                                       | 0.00                           | 1.54                         | 1.10                                                    | 0.00                           | 1.54                         | 1.10                                                    |
| >1713                                 | phoF        | SAUR2241 (SAR_RS11205)  | 0.00                              | 1.44                            | 0.46                                                       | 0.00                           | 1.44                         | 0.46                                                    | 0.00                           | 1.44                         | 0.46                                                    |
| >1714                                 | sigB        | SAUR2242 (SAR_RS11210)  | 0.00                              | 1.56                            | 0.13                                                       | 0.00                           | 1.56                         | 0.13                                                    | 0.00                           | 1.56                         | 0.13                                                    |
| >1715                                 | rsbW        | SAUR2243 (SAR_RS11215)  | 0.00                              | 0.63                            | 0.21                                                       | 0.00                           | 0.63                         | 0.21                                                    | 0.21                           | 0.63                         | 0.42                                                    |
| >1716                                 | rsbV        | SAUR2244 (SAR_RS11220)  | 0.00                              | 0.31                            | 0.31                                                       | 0.00                           | 0.31                         | 0.31                                                    | 0.00                           | 0.31                         | 0.31                                                    |
| >1717                                 | rsbU        | SAUR2245 (SAR_RS11225)  | 0.00                              | 0.10                            | 0.00                                                       | 0.00                           | 0.10                         | 0.00                                                    | 0.00                           | 0.10                         | 0.00                                                    |
| >1718                                 | mazF        | SAUR2247 (SAR_RS11235)  | 0.00                              | 0.28                            | 0.28                                                       | 0.00                           | 0.28                         | 0.28                                                    | 0.00                           | 0.28                         | 0.28                                                    |
| >1719                                 | mazE-ydcD   | SAUR2248 (SAR_RS11240)  | 0.00                              | 0.00                            | 0.00                                                       | 0.00                           | 0.00                         | 0.00                                                    | 0.00                           | 0.00                         | 0.00                                                    |
| >1720                                 | alc         | SAUR2249 (SAR_RS11245)  | 0.00                              | 1.48                            | 0.87                                                       | 0.00                           | 1.48                         | 0.87                                                    | 0.00                           | 1.48                         | 0.87                                                    |
| >1721                                 | acpS        | SAUR2250 (SAR_RS11250)  | 0.00                              | 1.39                            | 0.56                                                       | 0.00                           | 1.39                         | 0.56                                                    | 0.00                           | 1.39                         | 0.56                                                    |
| >1722                                 | ASIU8       | SAUR2251 (SAR_RS11255)  | 0.00                              | 2.24                            | 0.81                                                       | 0.00                           | 2.24                         | 0.81                                                    | 0.00                           | 2.24                         | 0.81                                                    |
| >1723                                 | DUF0304     | SAUR2252 (SAR_RS11260)  | 0.00                              | 2.78                            | 0.57                                                       | 0.00                           | 2.78                         | 0.57                                                    | 0.00                           | 2.78                         | 0.57                                                    |
| >1724                                 | Q9ZAH9      | SAUR2253 (SAR_RS11265)  | 0.00                              | 2.71                            | 0.63                                                       | 0.00                           | 2.71                         | 0.63                                                    | 0.00                           | 2.71                         | 0.63                                                    |
| >1725                                 | kdpC-chr    | SAUR2254 (SAR_RS11270)  | 0.00                              | 1.07                            | 1.25                                                       | 0.00                           | 1.07                         | 1.25                                                    | 0.00                           | 1.07                         | 1.25                                                    |
| >1726                                 | kdpB-chr    | SAUR2255 (SAR_RS11275)  | 0.00                              | 1.48                            | 0.49                                                       | 0.00                           | 1.48                         | 0.49                                                    | 0.05                           | 1.52                         | 0.54                                                    |
| >1727                                 | kdpA-chr    | SAUR2256 (SAR_RS11280)  | 0.00                              | 1.60                            | 0.59                                                       | 0.78                           | 3.26                         | 2.37                                                    | 0.38                           | 3.26                         | 2.37                                                    |
| >1728                                 | kdpF-chr    | SAUR2257 (SAR_RS11285)  | 0.00                              | 2.70                            | 2.70                                                       | 0.00                           | 2.70                         | 2.70                                                    | 0.00                           | 2.70                         | 2.70                                                    |
| >1729                                 | kdpD-chr    | SAUR2258 (SAR_RS11290)  | 0.00                              | 1.13                            | 0.30                                                       | 0.00                           | 1.13                         | 0.30                                                    | 0.08                           | 1.20                         | 0.38                                                    |
| >1730                                 | kdpE-chr    | SAUR2259 (SAR_RS11295)  | 0.14                              | 1.44                            | 1.01                                                       | 0.14                           | 1.44                         | 1.01                                                    | 0.14                           | 1.44                         | 1.01                                                    |
| >1731                                 | csbA        | SAUR2260 (SAR_RS11300)  | 0.00                              | 0.99                            | 0.33                                                       | 0.00                           | 0.99                         | 0.33                                                    | 0.00                           | 0.99                         | 0.33                                                    |
| >1732                                 | murF        | SAUR2261 (SAR_RS11305)  | 0.00                              | 0.88                            | 0.00                                                       | 0.00                           | 0.88                         | 0.00                                                    | 0.00                           | 0.88                         | 0.00                                                    |
| >1733                                 | ddlA        | SAUR2262 (SAR_RS11310)  | 0.00                              | 0.37                            | 0.75                                                       | 0.09                           | 0.47                         | 0.84                                                    | 0.09                           | 0.47                         | 0.84                                                    |
| >1734                                 | flvW1-rsdA  | SAUR2263 (SAR_RS11315)  | 0.00                              | 0.91                            | 0.58                                                       | 0.00                           | 0.91                         | 0.58                                                    | 0.00                           | 0.91                         | 0.58                                                    |
| >1735                                 | QSHB5       | (N/A)                   | 0.00                              | 0.00                            | 0.72                                                       | 0.00                           | 0.00                         | 0.72                                                    | 0.00                           | 0.00                         | 0.72                                                    |
| >1736                                 | cszO        | SAUR2266 (SAR_RS11330)  | 0.00                              | 0.95                            | 1.43                                                       | 0.00                           | 0.95                         | 1.43                                                    | 0.00                           | 0.95                         | 1.43                                                    |
| >1737                                 | cszR        | SAUR2267 (SAR_RS11335)  | 0.00                              | 0.68                            | 1.02                                                       | 0.34                           | 1.02                         | 1.36                                                    | 0.00                           | 0.68                         | 1.02                                                    |
| >1738                                 | clsZ        | SAUR2268 (SAR_RS11340)  | 0.13                              | 0.61                            | 0.20                                                       | 0.07                           | 0.54                         | 0.13                                                    | 0.07                           | 0.54                         | 0.13                                                    |
| >1739                                 | yedJ        | SAUR2269 (SAR_RS11345)  | 0.15                              | 1.70                            | 1.08                                                       | 0.15                           | 1.70                         | 1.08                                                    | 0.15                           | 1.70                         | 1.08                                                    |
| >1740                                 | yidC-oxaA   | SAUR2271 (SAR_RS11355)  | 0.00                              | 1.34                            | 0.23                                                       | 0.11                           | 0.34                         | 0.23                                                    | 0.11                           | 0.34                         | 0.23                                                    |
| >1741                                 | thiC        | SAUR2272 (SAR_RS11360)  | 0.00                              | 0.31                            | 0.31                                                       | 0.00                           | 0.31                         | 0.31                                                    | 0.00                           | 0.31                         | 0.31                                                    |
| >1742                                 | thiM        | SAUR2273 (SAR_RS11365)  | 0.13                              | 1.01                            | 0.13                                                       | 0.00                           | 0.88                         | 0.00                                                    | 0.00                           | 0.88                         | 0.00                                                    |
| >1743                                 | thiD2       | SAUR2274 (SAR_RS11370)  | 0.00                              | 1.32                            | 0.24                                                       | 0.00                           | 1.32                         | 0.24                                                    | 0.12                           | 1.44                         | 0.36                                                    |
| >1744                                 | tenA        | SAUR2275 (SAR_RS11375)  | 0.14                              | 0.58                            | 0.14                                                       | 0.00                           | 0.43                         | 0.00                                                    | 0.00                           | 0.43                         | 0.00                                                    |
| >1745                                 | sceD        | SAUR2277 (SAR_RS11385)  | 0.00                              | 0.71                            | 1.28                                                       | 0.00                           | 0.71                         | 1.28                                                    | 0.00                           | 0.71                         | 1.28                                                    |
| >1746                                 | QSHEA3      | SAUR2278 (SAR_RS11390)  | 0.00                              | 0.00                            | 0.00                                                       | 0.00                           | 0.00                         | 0.00                                                    | 0.00                           | 0.00                         | 0.00                                                    |
| >1747                                 | ywpF        | SAUR2279 (SAR_RS11395)  | 0.00                              | 0.23                            | 0.00                                                       | 0.00                           | 0.23                         | 0.00                                                    | 0.00                           | 0.23                         | 0.00                                                    |
| >1748                                 | fabI        | SAUR2280 (SAR_RS11400)  | 0.23                              | 1.13                            | 0.45                                                       | 0.23                           | 1.13                         | 0.45                                                    | 0.23                           | 1.13                         | 0.45                                                    |
| >1749                                 | murA        | SAUR2281 (SAR_RS11405)  | 0.00                              | 4.34                            | 0.32                                                       | 0.00                           | 4.34                         | 0.32                                                    | 0.00                           | 4.34                         | 0.32                                                    |
| >1750                                 | ywcB        | SAUR2282 (SAR_RS11410)  | 0.00                              | 0.00                            | 0.00                                                       | 0.00                           | 0.00                         | 0.00                                                    | 0.00                           | 0.00                         | 0.00                                                    |
| >1751                                 | atpE        | SAUR2284 (SAR_RS11420)  | 0.00                              | 0.25                            | 0.25                                                       | 0.25                           | 0.49                         | 0.49                                                    | 0.25                           | 0.49                         | 0.49                                                    |
| >1752                                 | atpD        | SAUR2285 (SAR_RS11425)  | 0.00                              | 0.42                            | 0.42                                                       | 0.00                           | 0.42                         | 0.42                                                    | 0.00                           | 0.42                         | 0.42                                                    |
| >1753                                 | atpG        | SAUR2286 (SAR_RS11430)  | 0.00                              | 0.23                            | 0.00                                                       | 0.12                           | 0.35                         | 0.12                                                    | 0.00                           | 0.23                         | 0.00                                                    |
| >1754                                 | atpA        | SAUR2287 (SAR_RS11435)  | 0.00                              | 0.07                            | 0.07                                                       | 0.00                           | 0.07                         | 0.07                                                    | 0.00                           | 0.07                         | 0.07                                                    |
| >1755                                 | atpH        | SAUR2288 (SAR_RS11440)  | 0.00                              | 0.56                            | 0.19                                                       | 0.00                           | 0.56                         | 0.19                                                    | 0.00                           | 0.56                         | 0.19                                                    |
| >1756                                 | atpF        | SAUR2289 (SAR_RS11445)  | 0.00                              | 0.19                            | 0.00                                                       | 0.00                           | 0.37                         | 0.38                                                    | 0.19                           | 0.38                         | 0.19                                                    |
| >1757                                 | atpL-utpE   | (N/A)                   | 0.00                              | 0.00                            | 0.00                                                       | 0.00                           | 0.00                         | 0.00                                                    | 0.00                           | 0.00                         | 0.00                                                    |
| >1758                                 | atpB        | SAUR2291 (SAR_RS11455)  | 0.00                              | 0.27                            | 0.00                                                       | 0.00                           | 0.27                         | 0.00                                                    | 0.00                           | 0.27                         | 0.00                                                    |
| >1759                                 | atpI        | SAUR2292 (SAR_RS11460)  | 0.00                              | 1.13                            | 3.67                                                       | 0.28                           | 1.41                         | 3.95                                                    | 0.28                           | 1.41                         | 3.95                                                    |
| >1760                                 | mnaA-wecB   | SAUR2293 (SAR_RS11465)  | 0.00                              | 0.53                            | 0.53                                                       | 0.00                           | 0.53                         | 0.53                                                    | 0.00                           | 0.53                         | 0.53                                                    |
| >1761                                 | upp         | SAUR2294 (SAR_RS11470)  | 0.00                              | 0.63                            | 0.16                                                       | 0.00                           | 0.63                         | 0.16                                                    | 0.00                           | 0.63                         | 0.16                                                    |
| >1762                                 | glyA        | SAUR2295 (SAR_RS11475)  | 0.08                              | 0.32                            | 0.40                                                       | 0.16                           | 0.40                         | 0.56                                                    | 0.08                           | 0.56                         | 0.48                                                    |
| >1763                                 | ywG         | SAUR2296 (SAR_RS11480)  | 0.13                              | 0.95                            | 0.95                                                       | 0.05                           | 0.95                         | 0.76                                                    | 0.05                           | 0.76                         | 0.76                                                    |
| >1764                                 | ptpB        | SAUR2297 (SAR_RS11485)  | 0.00                              | 0.24                            | 1.19                                                       | 0.00                           | 0.24                         | 1.19                                                    | 0.00                           | 0.24                         | 1.19                                                    |
| >1765                                 | tsaCrimN    | SAUR2298 (SAR_RS11490)  | 0.00                              | 0.85                            | 1.33                                                       | 0.00                           | 0.85                         | 1.33                                                    | 0.00                           | 0.85                         | 1.33                                                    |
| >1766                                 | prnC-hemK   | SAUR2299 (SAR_RS11495)  | 0.00                              | 0.36                            | 0.48                                                       | 0.00                           | 0.36                         | 0.48                                                    | 0.00                           | 0.36                         | 0.48                                                    |
| >1767                                 | prfA        | SAUR2300 (SAR_RS11500)  | 0.00                              | 1.02                            | 0.46                                                       | 0.00                           | 1.02                         | 0.46                                                    | 0.00                           | 1.02                         | 0.46                                                    |
| >1768                                 | tdk         | SAUR2301 (SAR_RS11505)  | 0.00                              | 0.83                            | 0.67                                                       | 0.00                           | 0.83                         | 0.67                                                    | 0.00                           | 0.83                         | 0.67                                                    |
| >1769                                 | rpmE        | (N/A)                   | 0.00                              | 0.00                            | 0.00                                                       | 0.00                           | 0.00                         | 0.00                                                    | 0.00                           | 0.00                         | 0.00                                                    |
| >1770                                 | rpo         | SAUR2304 (SAR_RS11520)  | 0.00                              | 0.76                            | 0.38                                                       | 0.00                           | 0.76                         | 0.38                                                    | 0.00                           | 0.76                         | 0.38                                                    |
| >1771                                 | aldA3       | SAUR2305 (SAR_RS11525)  | >=5.00                            | >=5.00                          | 0.00                                                       | >=5.00                         | >=5.00                       | 0.00                                                    | >=5.                           |                              |                                                         |



| Number/<br>Position in<br>the figures | Gene ID       | ID in PubMLST cg scheme | ED133 vs. swan<br>isolate 15V8707 | X22 vs. swan isolate<br>15V8707 | CC522 goat isolate<br>17CS1042 vs. swan<br>isolate 15V8707 | ED133 vs. duck<br>isolate V315 | X22 vs. duck isolate<br>V315 | CC522 goat isolate<br>17CS1042 vs. duck<br>isolate V315 | ED133 vs. duck<br>isolate V482 | X22 vs. duck isolate<br>V482 | CC522 goat isolate<br>17CS1042 vs. duck<br>isolate V482 |
|---------------------------------------|---------------|-------------------------|-----------------------------------|---------------------------------|------------------------------------------------------------|--------------------------------|------------------------------|---------------------------------------------------------|--------------------------------|------------------------------|---------------------------------------------------------|
| >1823                                 | rhbC2-sfaD    | SAUR2373 (SAR_R511865)  | 0.05                              | 0.91                            | 0.35                                                       | 0.05                           | 0.91                         | 0.35                                                    | 0.05                           | 0.91                         | 0.35                                                    |
| >1824                                 | asp23         | SAUR2374 (SAR_R511870)  | 0.00                              | 2.16                            | 0.20                                                       | 0.00                           | 2.16                         | 0.20                                                    | 0.00                           | 2.16                         | 0.20                                                    |
| >1825                                 | QSH2273       | SAUR2375 (SAR_R511875)  | 0.00                              | 1.67                            | 0.42                                                       | 0.00                           | 1.67                         | 0.42                                                    | 0.00                           | 1.67                         | 0.42                                                    |
| >1826                                 | QSH21-ramaP   | SAUR2376 (SAR_R511880)  | 0.00                              | 0.36                            | 1.46                                                       | 0.00                           | 0.36                         | 1.46                                                    | 0.00                           | 0.36                         | 1.46                                                    |
| >1827                                 | opusD2        | SAUR2377 (SAR_R511885)  | 0.13                              | 1.60                            | 0.96                                                       | 0.13                           | 1.60                         | 0.96                                                    | 0.13                           | 1.60                         | 0.96                                                    |
| >1828                                 | QSH219        | SAUR2378 (SAR_R511890)  | 0.00                              | 1.49                            | 0.79                                                       | 0.00                           | 1.49                         | 0.79                                                    | 0.00                           | 1.49                         | 0.79                                                    |
| >1829                                 | qorA-curA     | SAUR2379 (SAR_R511895)  | 0.10                              | 1.59                            | 1.29                                                       | 0.30                           | 1.79                         | 1.49                                                    | 0.10                           | 1.59                         | 1.29                                                    |
| >1830                                 | DUF0915       | (N/A)                   | 0.00                              | 0.80                            | 1.49                                                       | 0.00                           | 0.80                         | 1.49                                                    | 0.00                           | 0.80                         | 1.49                                                    |
| >1831                                 | lacG          | SAUR2381 (SAR_R511905)  | 0.00                              | 1.34                            | 0.85                                                       | 0.00                           | 1.34                         | 0.85                                                    | 0.00                           | 1.34                         | 0.85                                                    |
| >1832                                 | lacE          | SAUR2382 (SAR_R511910)  | 0.58                              | 1.28                            | 1.05                                                       | 0.58                           | 1.28                         | 1.05                                                    | 0.58                           | 1.28                         | 1.05                                                    |
| >1833                                 | lacF          | SAUR2383 (SAR_R511915)  | 0.00                              | 1.28                            | 1.28                                                       | 0.00                           | 1.28                         | 1.28                                                    | 0.00                           | 1.28                         | 1.28                                                    |
| >1834                                 | lacD          | SAUR2384 (SAR_R511920)  | 0.00                              | 0.82                            | 0.41                                                       | 0.00                           | 0.82                         | 0.41                                                    | 0.00                           | 0.82                         | 0.41                                                    |
| >1835                                 | lacC          | SAUR2385 (SAR_R511925)  | 0.00                              | 2.47                            | 0.64                                                       | 0.00                           | 2.47                         | 0.64                                                    | 0.00                           | 2.47                         | 0.64                                                    |
| >1836                                 | lacB          | SAUR2386 (SAR_R511930)  | 0.00                              | 0.78                            | 0.00                                                       | 0.00                           | 0.78                         | 0.00                                                    | 0.00                           | 0.78                         | 0.00                                                    |
| >1837                                 | lacA          | SAUR2387 (SAR_R511935)  | 0.23                              | 0.47                            | 0.47                                                       | 0.00                           | 0.23                         | 0.23                                                    | 0.00                           | 0.23                         | 0.23                                                    |
| >1838                                 | lacR          | SAUR2388 (SAR_R511940)  | 0.26                              | 2.65                            | 0.00                                                       | 0.26                           | 2.65                         | 0.00                                                    | 0.26                           | 2.65                         | 0.00                                                    |
| >1839                                 | cobB          | SAUR2389 (SAR_R511945)  | 0.00                              | >=5.00                          | >=5.00                                                     | 0.00                           | >=5.00                       | >=5.00                                                  | >=5.00                         | 2.46                         | 1.50                                                    |
| >1840                                 | QSH205        | (N/A)                   | 0.00                              | >=5.00                          | >=5.00                                                     | 0.00                           | >=5.00                       | >=5.00                                                  | 0.00                           | >=5.00                       | >=5.00                                                  |
| >1841                                 | yvgN2         | SAUR2394 (SAR_R511970)  | 0.00                              | 1.06                            | 1.06                                                       | 0.00                           | 1.06                         | 1.06                                                    | 0.00                           | 1.06                         | 1.06                                                    |
| >1842                                 | adhR          | SAUR2395 (SAR_R511975)  | 0.00                              | 0.96                            | 0.96                                                       | 0.00                           | 0.96                         | 0.96                                                    | 0.00                           | 0.96                         | 0.96                                                    |
| >1843                                 | hysA-L1.8     | (N/A)                   | 0.04                              | >=5.00                          | >=5.00                                                     | 0.04                           | >=5.00                       | >=5.00                                                  | 0.08                           | >=5.00                       | >=5.00                                                  |
| >1844                                 | eap-L2-eapH-1 | SAUR2400 (SAR_R512000)  | 0.00                              | 3.29                            | 0.47                                                       | 0.00                           | 3.29                         | 0.47                                                    | 0.00                           | 3.29                         | 0.47                                                    |
| >1845                                 | alsD-L1-budA  | SAUR2401 (SAR_R512005)  | 0.14                              | 2.55                            | 1.13                                                       | 0.14                           | 2.55                         | 1.13                                                    | 0.14                           | 2.55                         | 1.13                                                    |
| >1846                                 | alsS          | SAUR2402 (SAR_R512010)  | 0.00                              | 3.24                            | 0.54                                                       | 0.00                           | 3.24                         | 0.54                                                    | 0.00                           | 3.24                         | 0.54                                                    |
| >1847                                 | rpiJ          | SAUR2406 (SAR_R512030)  | 0.25                              | 0.25                            | 0.00                                                       | 0.25                           | 0.00                         | 0.00                                                    | 0.00                           | 0.00                         | 0.00                                                    |
| >1848                                 | rpiM          | SAUR2407 (SAR_R512035)  | 0.00                              | 0.46                            | 0.46                                                       | 0.00                           | 0.46                         | 0.46                                                    | 0.00                           | 0.46                         | 0.46                                                    |
| >1849                                 | truA          | SAUR2408 (SAR_R512040)  | 0.00                              | 2.99                            | 2.24                                                       | 0.00                           | 2.99                         | 2.24                                                    | 0.00                           | 2.99                         | 2.24                                                    |
| >1850                                 | ecfT          | SAUR2409 (SAR_R512045)  | 0.00                              | 1.49                            | 0.99                                                       | 0.00                           | 1.49                         | 0.99                                                    | 0.00                           | 1.49                         | 0.99                                                    |
| >1851                                 | ecfA1         | SAUR2410 (SAR_R512050)  | 0.00                              | >=5.00                          | 0.93                                                       | 0.00                           | >=5.00                       | 0.93                                                    | >=5.00                         | 0.00                         | >=5.00                                                  |
| >1852                                 | ecfA2         | SAUR2411 (SAR_R512055)  | 0.12                              | 1.11                            | 0.49                                                       | 0.12                           | 1.11                         | 0.49                                                    | 0.12                           | 1.11                         | 0.49                                                    |
| >1853                                 | rpiQ          | (N/A)                   | 0.00                              | 0.00                            | 0.00                                                       | 0.00                           | 0.00                         | 0.00                                                    | 0.00                           | 0.00                         | 0.00                                                    |
| >1854                                 | rpoA          | SAUR2415 (SAR_R512075)  | 0.00                              | 0.11                            | 0.00                                                       | 0.00                           | 0.11                         | 0.00                                                    | 0.00                           | 0.00                         | 0.00                                                    |
| >1855                                 | rpsK          | SAUR2416 (SAR_R512080)  | 0.00                              | 0.00                            | 0.00                                                       | 0.00                           | 0.00                         | 0.00                                                    | 0.00                           | 0.00                         | 0.00                                                    |
| >1856                                 | rpsM          | (N/A)                   | 0.00                              | 0.27                            | 0.55                                                       | 0.00                           | 0.27                         | 0.55                                                    | 0.00                           | 0.27                         | 0.55                                                    |
| >1857                                 | rpmJ          | (N/A)                   | 0.00                              | 0.00                            | 0.00                                                       | 0.00                           | 0.00                         | 0.00                                                    | 0.00                           | 0.00                         | 0.00                                                    |
| >1858                                 | infA          | (N/A)                   | 0.00                              | 0.00                            | 0.00                                                       | 0.00                           | 0.00                         | 0.00                                                    | 0.00                           | 0.00                         | 0.00                                                    |
| >1859                                 | adk           | SAUR2420 (SAR_R512100)  | 0.00                              | 0.15                            | 0.15                                                       | 0.00                           | 0.15                         | 0.15                                                    | 0.00                           | 0.15                         | 0.15                                                    |
| >1860                                 | secY1         | SAUR2421 (SAR_R512105)  | 0.00                              | 0.15                            | 0.08                                                       | 0.00                           | 0.15                         | 0.08                                                    | 0.08                           | 0.23                         | 0.15                                                    |
| >1861                                 | rpiO          | SAUR2422 (SAR_R512110)  | 0.00                              | 0.00                            | 0.00                                                       | 0.00                           | 0.00                         | 0.00                                                    | 0.00                           | 0.00                         | 0.00                                                    |
| >1862                                 | rpmD          | (N/A)                   | 0.00                              | 0.00                            | 0.00                                                       | 0.00                           | 0.00                         | 0.00                                                    | 0.00                           | 0.00                         | 0.00                                                    |
| >1863                                 | rpsE          | (N/A)                   | 0.00                              | 0.00                            | 0.00                                                       | 0.00                           | 0.00                         | 0.00                                                    | 0.00                           | 0.00                         | 0.00                                                    |
| >1864                                 | rpiR          | SAUR2425 (SAR_R512125)  | 0.00                              | 0.28                            | 0.00                                                       | 0.28                           | 0.56                         | 0.28                                                    | 0.00                           | 0.28                         | 0.00                                                    |
| >1865                                 | rpiF          | SAUR2426 (SAR_R512130)  | 0.00                              | 0.19                            | 0.19                                                       | 0.00                           | 0.19                         | 0.19                                                    | 0.00                           | 0.19                         | 0.19                                                    |
| >1866                                 | rpsH          | SAUR2427 (SAR_R512135)  | 0.00                              | 0.25                            | 0.25                                                       | 0.00                           | 0.25                         | 0.25                                                    | 0.25                           | 0.50                         | 0.50                                                    |
| >1867                                 | rpsZ          | (N/A)                   | 0.00                              | 0.00                            | 0.00                                                       | 0.00                           | 0.00                         | 0.00                                                    | 0.00                           | 0.00                         | 0.00                                                    |
| >1868                                 | rpiE          | (N/A)                   | 0.00                              | 0.37                            | 0.37                                                       | 0.00                           | 0.37                         | 0.37                                                    | 0.00                           | 0.37                         | 0.37                                                    |
| >1869                                 | rpiX          | SAUR2430 (SAR_R512150)  | 0.00                              | 0.31                            | 0.00                                                       | 0.00                           | 0.31                         | 0.00                                                    | 0.00                           | 0.31                         | 0.00                                                    |
| >1870                                 | rpiN          | SAUR2431 (SAR_R512155)  | 0.00                              | 0.54                            | 0.54                                                       | 0.00                           | 0.54                         | 0.54                                                    | 0.00                           | 0.54                         | 0.54                                                    |
| >1871                                 | rpsQ          | SAUR2432 (SAR_R512160)  | 0.00                              | 0.00                            | 0.38                                                       | 0.00                           | 0.00                         | 0.38                                                    | 0.00                           | 0.00                         | 0.38                                                    |
| >1872                                 | rpmC          | (N/A)                   | 0.00                              | 0.00                            | 0.00                                                       | 0.00                           | 0.00                         | 0.00                                                    | 0.00                           | 0.00                         | 0.00                                                    |
| >1873                                 | rpiP          | SAUR2434 (SAR_R512170)  | 0.00                              | 0.23                            | 0.00                                                       | 0.00                           | 0.23                         | 0.00                                                    | 0.00                           | 0.23                         | 0.00                                                    |
| >1874                                 | rpsC          | SAUR2435 (SAR_R512175)  | 0.15                              | 0.31                            | 0.46                                                       | 0.00                           | 0.15                         | 0.31                                                    | 0.00                           | 0.15                         | 0.31                                                    |
| >1875                                 | rpiY          | (N/A)                   | 0.00                              | 0.00                            | 0.00                                                       | 2.82                           | 0.00                         | 0.00                                                    | 2.82                           | 0.00                         | 0.00                                                    |
| >1876                                 | rpsS          | (N/A)                   | 0.00                              | 0.00                            | 0.00                                                       | 0.00                           | 0.00                         | 0.00                                                    | 0.00                           | 0.00                         | 0.00                                                    |
| >1877                                 | rpiB          | SAUR2438 (SAR_R512190)  | 0.00                              | 0.24                            | 0.24                                                       | 0.12                           | 0.36                         | 0.36                                                    | 0.00                           | 0.24                         | 0.24                                                    |
| >1878                                 | rpiW          | SAUR2439 (SAR_R512195)  | 0.00                              | 0.72                            | 0.72                                                       | 0.00                           | 0.72                         | 0.72                                                    | 0.00                           | 0.72                         | 0.72                                                    |
| >1879                                 | rpiD          | SAUR2440 (SAR_R512200)  | 0.00                              | 0.16                            | 0.00                                                       | 0.00                           | 0.16                         | 0.00                                                    | 0.00                           | 0.16                         | 0.00                                                    |
| >1880                                 | rpiC          | SAUR2441 (SAR_R512205)  | 0.00                              | 0.00                            | 0.30                                                       | 0.00                           | 0.00                         | 0.30                                                    | 0.00                           | 0.00                         | 0.30                                                    |
| >1881                                 | rpsJ          | SAUR2442 (SAR_R512210)  | 0.00                              | 0.65                            | 0.00                                                       | 0.00                           | 0.65                         | 0.00                                                    | 0.00                           | 0.65                         | 0.00                                                    |
| >1882                                 | QSHDV6        | SAUR2443 (SAR_R512215)  | 0.00                              | 1.03                            | 0.51                                                       | 0.00                           | 1.03                         | 0.51                                                    | 0.00                           | 1.03                         | 0.51                                                    |
| >1883                                 | pbuG          | SAUR2444 (SAR_R512220)  | 0.00                              | 0.67                            | 0.45                                                       | 0.00                           | 0.67                         | 0.45                                                    | 0.07                           | 0.75                         | 0.52                                                    |
| >1884                                 | topB          | SAUR2445 (SAR_R512225)  | 0.05                              | 0.89                            | 0.70                                                       | 0.14                           | 0.98                         | 0.80                                                    | 0.09                           | 0.94                         | 0.75                                                    |
| >1885                                 | QSHDV3        | SAUR2447 (SAR_R512235)  | 0.00                              | 1.46                            | 2.03                                                       | 0.00                           | 1.46                         | 2.03                                                    | 0.00                           | 1.46                         | 2.03                                                    |
| >1886                                 | glcU          | SAUR2448 (SAR_R512240)  | 0.00                              | 0.58                            | 0.23                                                       | 0.12                           | 0.69                         | 0.35                                                    | 0.00                           | 0.58                         | 0.23                                                    |
| >1887                                 | Q1Y7Y7        | SAUR2449 (SAR_R512245)  | 0.00                              | 1.21                            | >=5.00                                                     | 0.00                           | 1.21                         | >=5.00                                                  | 0.00                           | 1.21                         | >=5.00                                                  |
| >1888                                 | QSHDU8+mspA   | SAUR2451 (SAR_R512255)  | 0.00                              | 0.63                            | 0.63                                                       | 0.00                           | 0.63                         | 0.63                                                    | 0.00                           | 0.63                         | 0.63                                                    |
| >1889                                 | acrB          | SAUR2452 (SAR_R512260)  | 0.00                              | 0.66                            | 0.66                                                       | 0.00                           | 0.66                         | 0.66                                                    | 0.00                           | 0.66                         | 0.66                                                    |
| >1890                                 | fmbB-femX     | SAUR2453 (SAR_R512265)  | 0.00                              | 0.87                            | 0.95                                                       | 0.39                           | 0.47                         | 0.47                                                    | 0.00                           | 0.87                         | 0.39                                                    |
| >1891                                 | QSHDU5        | SAUR2455 (SAR_R512275)  | 0.00                              | 0.92                            | 0.78                                                       | 0.00                           | 0.92                         | 0.78                                                    | 0.00                           | 0.92                         | 0.78                                                    |
| >1892                                 | QSHDU4        | SAUR2456 (SAR_R512280)  | 0.00                              | 0.91                            | 0.68                                                       | 0.00                           | 0.91                         | 0.68                                                    | 0.00                           | 0.91                         | 0.68                                                    |
| >1893                                 | ybfD          | SAUR2457 (SAR_R512285)  | 0.00                              | 0.33                            | 0.41                                                       | 0.00                           | 0.33                         | 0.41                                                    | 0.00                           | 0.33                         | 0.41                                                    |
| >1894                                 | sarV          | SAUR2458 (SAR_R512290)  | 0.00                              | 0.00                            | 0.00                                                       | 0.00                           | 0.00                         | 0.00                                                    | 0.00                           | 0.00                         | 0.00                                                    |
| >1895                                 | mosA          | SAUR2461 (SAR_R512305)  | 0.00                              | 0.78                            | 1.29                                                       | 0.00                           | 0.78                         | 1.29                                                    | 0.00                           | 0.78                         | 1.29                                                    |
| >1896                                 | mobA          | SAUR2462 (SAR_R512310)  | 0.00                              | 0.67                            | 0.00                                                       | 0.00                           | 0.67                         | 1.00                                                    | 0.00                           | 0.67                         | 1.00                                                    |
| >1897                                 | mosD          | SAUR2463 (SAR_R512315)  | 0.00                              | 1.21                            | 0.00                                                       | 1.21                           | >=5.00                       | >=5.00                                                  | 1.21                           | >=5.00                       | >=5.00                                                  |
| >1898                                 | mosE          | SAUR2464 (SAR_R512320)  | 0.00                              | 0.89                            | 0.45                                                       | 0.00                           | 0.89                         | 0.45                                                    | 0.00                           | 0.89                         | 0.45                                                    |
| >1899                                 | mobB          | SAUR2465 (SAR_R512325)  | 0.00                              | >=5.00                          | 0.82                                                       | 0.00                           | >=5.00                       | 0.82                                                    | 0.00                           | >=5.00                       | 0.82                                                    |
| >1900                                 | moeA          | SAUR2466 (SAR_R512330)  | 0.00                              | 1.43                            | 0.40                                                       | 0.00                           | 1.43                         | 0.40                                                    | 0.00                           | 1.43                         | 0.40                                                    |
| >1901                                 | mosC          | SAUR2467 (SAR_R512335)  | 0.00                              | 1.40                            | 1.21                                                       | 0.20                           | 0.61                         | 1.41                                                    | 0.00                           | 0.40                         | 1.21                                                    |
| >1902                                 | mosB          | SAUR2468 (SAR_R512340)  | 0.00                              | 1.18                            | 0.59                                                       | 0.00                           | 1.18                         | 0.59                                                    | 0.00                           | 1.18                         | 0.59                                                    |
| >1903                                 | mosB          | SAUR2469 (SAR_R512345)  | 0.00                              | 1.19                            | 0.40                                                       | 0.00                           | >=5.00                       | >=5.00                                                  | 0.00                           | >=5.00                       | >=5.00                                                  |
| >1904                                 | modC          | SAUR2470 (SAR_R512350)  | 0.00                              | 0.83                            | 0.50                                                       | 0.00                           | 0.83                         | 0.50                                                    | 0.00                           | 0.83                         | 0.50                                                    |
| >1905                                 | modB          | SAUR2471 (SAR_R512355)  | 0.15                              | 0.15                            | 0.60                                                       | 0.15                           | 0.15                         | 0.60                                                    | 0.15                           | 0.15                         | 0.60                                                    |
| >1906                                 | modA          | SAUR2472 (SAR_R512360)  | 0.00                              | 2.04                            | 0.26                                                       | 0.00                           | 2.04                         | 0.26                                                    | 0.00                           | 2.04                         | 0.26                                                    |
| >1907                                 | fdhD-narQ     | SAUR2473 (SAR_R512365)  | 0.00                              | 1.50                            | 0.88                                                       | 0.13                           | 1.63                         | 1.00                                                    | 0.00                           | 1.50                         | 0.88                                                    |
| >1908                                 | QSHDS6        | SAUR2474 (SAR_R512370)  | 0.00                              | 0.78                            | 0.13                                                       | 0.00                           | 0.78                         | 0.13                                                    | 0.00                           | 0.78                         | 0.13                                                    |
| >1909                                 | bioY          | SAUR2475 (SAR_R512375)  | 0.00                              | 0.72                            | 0.54                                                       | 0.00                           | 0.72                         | 0.54                                                    | 0.00                           | 0.72                         | 0.54                                                    |
| >1910                                 | rnbA          | SAUR2476 (SAR_R512380)  | 0.00                              | 1.70                            | 1.57                                                       | 0.00                           | 0.00                         | >=5.00                                                  | 0.00                           | >=5.00                       | >=5.00                                                  |
| >1911                                 | fhuD2         | SAUR2477 (SAR_R512385)  | 0.00                              | 0.55                            | 0.44                                                       | 0.00                           | 0.55                         | 0.44                                                    | 0.00                           | 0.55                         | 0.44                                                    |
| >1912                                 | calA          | SAUR2478 (SAR_R512390)  | 0.00                              | 0.95                            | 0.52                                                       | 0.00                           | 0.95                         | 0.52                                                    | 0.00                           | 0.95                         | 0.52                                                    |
| >1913                                 | utp-yut       | SAUR2479 (SAR_R512395)  | 0.00                              | 4.19                            | 0.77                                                       | 0.00                           | 4.19                         | 0.77                                                    | 0.00                           | 4.19                         | 0.77                                                    |
| >1914                                 | ureA          | (N/A)                   | 0.33                              | 0.66                            | 0.66                                                       | 0.33                           | 0.66                         | 0.66                                                    | 0.33                           | 0.66                         | 0.66                                                    |
| >1915                                 | ureB          | SAUR2481 (SAR_R512405)  | 0.00                              | 0.73                            | 0.24                                                       | 0.00                           | 0.73                         | 0.24                                                    | 0.00                           | 0.73                         | 0.24                                                    |
| >1916                                 | ureC          | SAUR2482 (SAR_R512410)  | 0.00                              | 1.22                            | 0.35                                                       | 0.00                           | 1.22                         | 0.35                                                    | 0.06                           | 1.28                         | 0.41                                                    |
| >1917                                 | ureF          | SAUR2483 (SAR_R512415)  | 0.00                              | 1.32                            | 1.10                                                       | 0.00                           | 1.32                         | 1.10                                                    | 0.00                           | 1.32                         | 1.10                                                    |
| >1918                                 | ureF          | SAUR2484 (SAR_R512420)  | 0.00                              | 1.01                            | 1.01                                                       | 0.00                           | 1.01                         | 1.01                                                    | 0.00                           | 1.01                         | 1.01                                                    |
| >1919                                 | ureG          | SAUR2485 (SAR_R512425)  | 0.00                              | 0.98                            | 0.65                                                       | 0.00                           | 0.98                         | 0.65                                                    | 0.16                           | 1.14                         | 0.81                                                    |
| >1920                                 | ureD          | SAUR2486 (SAR_R512430)  | 0.00                              | 0.60                            | 0.48                                                       | 0.00                           | 0.60                         |                                                         |                                |                              |                                                         |

| Number/<br>Position in the<br>figures | Gene ID         | ID in PubMLST cg scheme | ED133 vs. swan<br>isolate 15V8707 | X22 vs. swan isolate<br>15V8707 | CC522 goat isolate<br>17CS1042 vs. swan<br>isolate 15V8707 | ED133 vs. duck<br>isolate V315 | X22 vs. duck isolate<br>V315 | CC522 goat isolate<br>17CS1042 vs. duck<br>isolate V315 | ED133 vs. duck<br>isolate V482 | X22 vs. duck isolate<br>V482 | CC522 goat isolate<br>17CS1042 vs. duck<br>isolate V482 |
|---------------------------------------|-----------------|-------------------------|-----------------------------------|---------------------------------|------------------------------------------------------------|--------------------------------|------------------------------|---------------------------------------------------------|--------------------------------|------------------------------|---------------------------------------------------------|
| >1971                                 | fnl-idl2        | SAUR2543 (SAR_RS12715)  | 0.00                              | 0.95                            | 0.38                                                       | 0.00                           | 0.95                         | 0.38                                                    | 0.00                           | 0.95                         | 0.38                                                    |
| >1972                                 | corA            | SAUR2544 (SAR_RS12720)  | 0.00                              | 0.74                            | 0.63                                                       | 0.00                           | 0.74                         | 0.63                                                    | 0.00                           | 0.74                         | 0.63                                                    |
| >1973                                 | QSHDK8          | SAUR2545 (SAR_RS12725)  | 0.20                              | 0.39                            | 0.39                                                       | 0.20                           | 0.39                         | 0.39                                                    | 0.20                           | 0.39                         | 0.39                                                    |
| >1974                                 | QSHDK7          | SAUR2546 (SAR_RS12730)  | 0.00                              | 1.19                            | >5.00                                                      | 0.00                           | 1.19                         | >5.00                                                   | 0.00                           | 1.19                         | >5.00                                                   |
| >1975                                 | mlhA            | (N/A)                   | 0.00                              | 0.66                            | 0.33                                                       | 0.00                           | 0.66                         | 0.33                                                    | 0.00                           | 0.66                         | 0.33                                                    |
| >1976                                 | QSHDK5          | SAUR2548 (SAR_RS12740)  | 0.16                              | 1.10                            | 0.78                                                       | 0.16                           | 1.10                         | 0.78                                                    | 0.16                           | 1.10                         | 0.78                                                    |
| >1977                                 | semB            | SAUR2549 (SAR_RS12745)  | 0.00                              | >5.00                           | 0.16                                                       | 0.00                           | >5.00                        | 0.16                                                    | 0.00                           | >5.00                        | 0.16                                                    |
| >1978                                 | semA            | SAUR2550 (SAR_RS12750)  | 0.00                              | >5.00                           | 0.31                                                       | 0.00                           | >5.00                        | 0.31                                                    | 0.00                           | >5.00                        | 0.31                                                    |
| >1979                                 | QSHDK2          | SAUR2551 (SAR_RS12755)  | 0.00                              | 1.26                            | 0.00                                                       | 0.00                           | 1.26                         | 0.00                                                    | 0.00                           | 1.26                         | 0.00                                                    |
| >1980                                 | lcaB            | SAUR2553 (SAR_RS12765)  | 0.08                              | 1.32                            | 0.66                                                       | 0.00                           | 1.24                         | 0.58                                                    | 0.00                           | 1.24                         | 0.58                                                    |
| >1981                                 | lcaA            | SAUR2555 (SAR_RS12775)  | 0.22                              | 0.66                            | 0.72                                                       | 0.22                           | 0.72                         | 0.36                                                    | 0.20                           | 0.72                         | 0.36                                                    |
| >1982                                 | lcaR            | SAUR2557 (SAR_RS12785)  | 0.00                              | 0.22                            | 0.00                                                       | 0.22                           | 0.22                         | 0.00                                                    | 0.22                           | 0.22                         | 0.00                                                    |
| >1983                                 | QSHDJ7          | SAUR2558 (SAR_RS12790)  | 0.00                              | 0.72                            | 0.00                                                       | 0.00                           | 0.72                         | 0.00                                                    | 0.00                           | 0.72                         | 0.00                                                    |
| >1984                                 | hrtA            | SAUR2559 (SAR_RS12795)  | 0.15                              | 1.05                            | >5.00                                                      | 0.15                           | 1.05                         | >5.00                                                   | 0.15                           | 1.05                         | >5.00                                                   |
| >1985                                 | hrtB            | SAUR2560 (SAR_RS12800)  | 0.00                              | 1.23                            | 0.47                                                       | 0.19                           | 1.42                         | 0.66                                                    | 0.00                           | 1.23                         | 0.47                                                    |
| >1986                                 | hssR            | SAUR2561 (SAR_RS12805)  | 0.00                              | 0.89                            | 0.59                                                       | 0.00                           | 0.89                         | 0.59                                                    | 0.00                           | 0.89                         | 0.59                                                    |
| >1987                                 | hssS            | SAUR2562 (SAR_RS12810)  | 0.07                              | 1.24                            | 0.87                                                       | 0.07                           | 1.24                         | 0.87                                                    | 0.07                           | 1.24                         | 0.87                                                    |
| >1988                                 | hstT            | SAUR2563 (SAR_RS12815)  | 0.00                              | 1.59                            | 0.23                                                       | 0.00                           | 1.59                         | 0.23                                                    | 0.00                           | 1.59                         | 0.23                                                    |
| >1989                                 | QSHDI1+DUF3021  | SAUR2564 (SAR_RS12820)  | 0.00                              | 4.64                            | 0.88                                                       | 0.00                           | 4.64                         | 0.88                                                    | 0.00                           | 4.64                         | 0.88                                                    |
| >1990                                 | mgo             | SAUR2568 (SAR_RS12840)  | 0.00                              | 1.08                            | 0.14                                                       | 0.00                           | 1.08                         | 0.14                                                    | 0.00                           | 1.08                         | 0.14                                                    |
| >1991                                 | lctP-locus2     | SAUR2569 (SAR_RS12845)  | 0.00                              | 0.63                            | 0.00                                                       | 0.00                           | 0.63                         | 0.00                                                    | 0.00                           | 0.63                         | 0.00                                                    |
| >1992                                 | tagF            | (N/A)                   | 0.00                              | 0.72                            | 0.66                                                       | 0.00                           | 0.72                         | 0.66                                                    | 0.00                           | 0.72                         | 0.66                                                    |
| >1993                                 | QSHDI7          | SAUR2571 (SAR_RS12855)  | 0.00                              | 0.63                            | 0.32                                                       | 0.16                           | 0.79                         | 0.48                                                    | 0.00                           | 0.63                         | 0.32                                                    |
| >1994                                 | galA            | SAUR2572 (SAR_RS12860)  | 0.19                              | 1.16                            | 0.78                                                       | 0.00                           | 0.97                         | 0.58                                                    | >5.00                          | >5.00                        | >5.00                                                   |
| >1995                                 | yHfP-A1KWx9     | (N/A)                   | 0.00                              | 0.70                            | 0.20                                                       | 0.00                           | 0.70                         | 0.20                                                    | >5.00                          | >5.00                        | >5.00                                                   |
| >1996                                 | QSHDI4          | SAUR2574 (SAR_RS12870)  | 0.00                              | >5.00                           | 1.99                                                       | 0.25                           | >5.00                        | 2.24                                                    | 0.00                           | >5.00                        | 1.99                                                    |
| >1997                                 | iruO            | SAUR2575 (SAR_RS12875)  | 0.19                              | 1.06                            | 0.58                                                       | 0.10                           | 0.97                         | 0.48                                                    | 0.10                           | 0.97                         | 0.48                                                    |
| >1998                                 | QSHDI2          | SAUR2577 (SAR_RS12885)  | 0.00                              | 0.00                            | 0.00                                                       | 0.00                           | 0.00                         | 0.00                                                    | 0.00                           | 0.00                         | 0.00                                                    |
| >1999                                 | pip             | SAUR2579 (SAR_RS12895)  | 0.00                              | 0.94                            | 0.23                                                       | 0.00                           | 0.94                         | 0.23                                                    | 0.00                           | 0.94                         | 0.23                                                    |
| >2000                                 | QSHDH9+tetR21   | SAUR2580 (SAR_RS12900)  | 0.00                              | 0.64                            | 0.48                                                       | 0.00                           | 0.64                         | 0.48                                                    | 0.00                           | 0.64                         | 0.48                                                    |
| >2001                                 | colB            | SAUR2581 (SAR_RS12905)  | 0.00                              | 0.42                            | 0.00                                                       | 0.00                           | 0.42                         | 0.00                                                    | 0.00                           | 0.42                         | 0.00                                                    |
| >2002                                 | scrA            | SAUR2582 (SAR_RS12910)  | 0.00                              | 1.04                            | 0.35                                                       | 0.00                           | 1.04                         | 0.35                                                    | 0.00                           | 1.04                         | 0.35                                                    |
| >2003                                 | DUF1722         | SAUR2583 (SAR_RS12915)  | 0.26                              | 1.04                            | 0.52                                                       | 0.26                           | 1.04                         | 0.52                                                    | 0.52                           | 1.30                         | 0.78                                                    |
| >2004                                 | rspnaraC        | SAUR2584 (SAR_RS12920)  | 0.05                              | 1.28                            | 0.14                                                       | 0.00                           | 1.23                         | 0.09                                                    | 0.05                           | 1.28                         | 0.14                                                    |
| >2005                                 | ydaG            | SAUR2585 (SAR_RS12925)  | 0.00                              | >5.00                           | 0.47                                                       | 0.00                           | >5.00                        | 0.47                                                    | 0.00                           | >5.00                        | 0.47                                                    |
| >2006                                 | QSHDH2+DUF4889  | (N/A)                   | 0.00                              | >5.00                           | 0.00                                                       | 0.00                           | >5.00                        | 0.00                                                    | 0.00                           | >5.00                        | 0.00                                                    |
| >2007                                 | glfT            | SAUR2588 (SAR_RS12940)  | 0.00                              | 0.39                            | 0.39                                                       | 0.00                           | 0.39                         | 0.39                                                    | 0.00                           | 0.39                         | 0.39                                                    |
| >2008                                 | DUF3139         | SAUR2589 (SAR_RS12945)  | 0.27                              | 1.37                            | 0.82                                                       | 0.00                           | 1.09                         | 0.55                                                    | 0.27                           | 1.37                         | 0.82                                                    |
| >2009                                 | narJ            | SAUR2590 (SAR_RS12950)  | 0.00                              | 1.40                            | 0.93                                                       | 0.00                           | 1.17                         | 0.70                                                    | 0.00                           | 1.17                         | 0.70                                                    |
| >2010                                 | hsp20           | (N/A)                   | 0.23                              | 1.40                            | 0.93                                                       | 0.00                           | 1.17                         | 0.70                                                    | 0.00                           | 1.17                         | 0.70                                                    |
| >2011                                 | narK            | SAUR2592 (SAR_RS12960)  | 0.00                              | 1.71                            | 0.17                                                       | 0.00                           | 1.71                         | 0.17                                                    | 0.00                           | 1.71                         | 0.17                                                    |
| >2012                                 | nreC            | SAUR2595 (SAR_RS12975)  | 0.00                              | 0.31                            | 0.00                                                       | 0.00                           | 0.31                         | 0.00                                                    | 0.00                           | 0.31                         | 0.00                                                    |
| >2013                                 | nreB            | SAUR2596 (SAR_RS12980)  | 0.00                              | 0.48                            | 0.00                                                       | 0.00                           | 0.48                         | 0.00                                                    | 0.00                           | 0.48                         | 0.00                                                    |
| >2014                                 | nreA            | SAUR2597 (SAR_RS12985)  | 0.00                              | 0.44                            | 0.22                                                       | 0.00                           | 0.44                         | 0.22                                                    | 0.00                           | 0.44                         | 0.22                                                    |
| >2015                                 | narI            | SAUR2598 (SAR_RS12990)  | 0.00                              | 1.18                            | 0.29                                                       | 0.00                           | 1.18                         | 0.29                                                    | 0.00                           | 1.18                         | 0.29                                                    |
| >2016                                 | narJ            | SAUR2599 (SAR_RS12995)  | 0.17                              | 0.17                            | 0.00                                                       | 0.00                           | 0.17                         | 0.00                                                    | 0.00                           | 0.17                         | 0.00                                                    |
| >2017                                 | narH            | SAUR2600 (SAR_RS13000)  | 0.00                              | 0.96                            | 0.56                                                       | 0.00                           | 0.96                         | >5.00                                                   | 0.06                           | 1.02                         | >5.00                                                   |
| >2018                                 | narG            | SAUR2601 (SAR_RS13005)  | 0.00                              | 0.89                            | 1.00                                                       | 0.03                           | 0.92                         | 1.03                                                    | 0.00                           | 0.89                         | 1.00                                                    |
| >2019                                 | nasFrcobA       | SAUR2602 (SAR_RS13010)  | 0.00                              | 1.64                            | 0.92                                                       | 0.00                           | 1.64                         | 0.92                                                    | 0.00                           | 1.64                         | 0.92                                                    |
| >2020                                 | nasE-nirD       | SAUR2603 (SAR_RS13015)  | 0.00                              | 0.63                            | 0.32                                                       | 0.00                           | 0.63                         | 0.32                                                    | 0.00                           | 0.63                         | 0.32                                                    |
| >2021                                 | nasD-nirB       | SAUR2604 (SAR_RS13020)  | 0.00                              | 0.96                            | 0.21                                                       | 0.00                           | 0.96                         | 0.21                                                    | 0.00                           | 0.96                         | 0.21                                                    |
| >2022                                 | nirK-nasR-rchbX | SAUR2605 (SAR_RS13025)  | 0.00                              | >5.00                           | >5.00                                                      | 0.00                           | >5.00                        | >5.00                                                   | 0.00                           | >5.00                        | >5.00                                                   |
| >2023                                 | QSHDI4-ytmI     | SAUR2606 (SAR_RS13030)  | 0.00                              | >5.00                           | 1.47                                                       | 0.00                           | >5.00                        | 1.47                                                    | 0.00                           | >5.00                        | 1.47                                                    |
| >2024                                 | focA-L2-nirC    | SAUR2607 (SAR_RS13035)  | 0.00                              | >5.00                           | 0.48                                                       | 0.00                           | >5.00                        | 0.48                                                    | 0.00                           | >5.00                        | 0.48                                                    |
| >2025                                 | Q8NV18          | (N/A)                   | 0.00                              | 1.09                            | 0.00                                                       | 0.00                           | 1.09                         | 0.00                                                    | 0.00                           | 1.09                         | 0.00                                                    |
| >2026                                 | QSHDF2          | SAUR2609 (SAR_RS13045)  | 0.00                              | 1.71                            | 0.64                                                       | 0.00                           | 1.71                         | 0.64                                                    | 0.00                           | 1.71                         | 0.64                                                    |
| >2027                                 | zinT-adiC       | SAUR2610 (SAR_RS13050)  | 0.26                              | 0.90                            | 0.58                                                       | 0.19                           | 0.90                         | 0.51                                                    | 0.19                           | 0.90                         | 0.51                                                    |
| >2028                                 | yoeB1           | (N/A)                   | 0.00                              | 1.87                            | 2.25                                                       | 0.37                           | 2.25                         | 2.62                                                    | 0.00                           | 1.87                         | 2.25                                                    |
| >2029                                 | yefM1           | (N/A)                   | 0.00                              | 1.40                            | 1.59                                                       | 0.00                           | 0.40                         | 1.59                                                    | 0.00                           | 0.40                         | 1.59                                                    |
| >2030                                 | shbA            | SAUR2614 (SAR_RS13070)  | 0.17                              | 1.00                            | 0.83                                                       | 0.00                           | 0.83                         | 0.67                                                    | 0.00                           | 0.83                         | 0.67                                                    |
| >2031                                 | DUF4467         | SAUR2615 (SAR_RS13075)  | >5.00                             | >5.00                           | >5.00                                                      | 0.00                           | 0.26                         | 0.26                                                    | 0.00                           | 0.26                         | 0.00                                                    |
| >2032                                 | fmbA            | SAUR2616 (SAR_RS13080)  | 0.00                              | 1.60                            | 0.40                                                       | 0.08                           | 1.68                         | 0.48                                                    | 0.00                           | 1.60                         | 0.40                                                    |
| >2033                                 | tcyC            | SAUR2617 (SAR_RS13085)  | 0.00                              | 0.27                            | 0.14                                                       | 0.00                           | 0.27                         | 0.14                                                    | 0.00                           | 0.27                         | 0.14                                                    |
| >2034                                 | tcyB            | SAUR2618 (SAR_RS13090)  | 0.14                              | 0.27                            | 0.41                                                       | 0.00                           | 0.14                         | 0.27                                                    | 0.00                           | 0.14                         | 0.27                                                    |
| >2035                                 | tcyA            | SAUR2619 (SAR_RS13095)  | 0.51                              | 1.15                            | 1.28                                                       | 0.00                           | 0.64                         | 0.77                                                    | 0.00                           | 0.64                         | 0.77                                                    |
| >2036                                 | mdcA            | SAUR2620 (SAR_RS13100)  | 0.00                              | 1.32                            | 0.90                                                       | 0.00                           | 1.32                         | 0.90                                                    | 0.07                           | 1.39                         | 0.97                                                    |
| >2037                                 | gpmA2           | SAUR2621 (SAR_RS13105)  | 0.00                              | 1.73                            | 0.29                                                       | 0.00                           | 1.73                         | 0.29                                                    | 0.00                           | 1.73                         | 0.29                                                    |
| >2038                                 | cdff            | SAUR2623 (SAR_RS13115)  | 0.58                              | 0.58                            | 0.69                                                       | 0.12                           | 0.58                         | 0.58                                                    | 0.00                           | 0.58                         | 0.46                                                    |
| >2039                                 | shl             | SAUR2625 (SAR_RS13125)  | 0.00                              | >5.00                           | >5.00                                                      | 3.38                           | 3.24                         | 3.53                                                    | 0.00                           | >5.00                        | >5.00                                                   |
| >2040                                 | hlgA            | SAUR2627 (SAR_RS13135)  | 0.11                              | 0.54                            | 0.11                                                       | 0.11                           | 0.54                         | 0.11                                                    | 0.11                           | 0.54                         | 0.11                                                    |
| >2041                                 | lukS-hlgC       | SAUR2628 (SAR_RS13140)  | 0.00                              | 0.52                            | 0.21                                                       | 0.00                           | 0.52                         | 0.21                                                    | 1.15                           | 1.67                         | 1.36                                                    |
| >2042                                 | lukF-hlgB       | SAUR2629 (SAR_RS13145)  | 0.00                              | 0.82                            | 0.10                                                       | 0.00                           | 0.82                         | 0.10                                                    | 0.00                           | 0.82                         | 0.10                                                    |
| >2043                                 | bioX            | SAUR2630 (SAR_RS13150)  | 0.00                              | 1.28                            | 0.64                                                       | 0.00                           | 1.28                         | 0.64                                                    | 0.00                           | 1.28                         | 0.64                                                    |
| >2044                                 | bioW            | SAUR2631 (SAR_RS13155)  | 0.00                              | 1.30                            | 1.15                                                       | 0.00                           | 1.30                         | 1.15                                                    | 0.00                           | 1.30                         | 1.15                                                    |
| >2045                                 | bioF            | SAUR2632 (SAR_RS13160)  | 0.00                              | 1.17                            | 1.17                                                       | 0.00                           | 1.17                         | 1.17                                                    | 0.00                           | 1.17                         | 1.17                                                    |
| >2046                                 | bioB            | SAUR2633 (SAR_RS13165)  | 0.00                              | 1.09                            | 0.99                                                       | 0.00                           | 1.09                         | 0.99                                                    | 0.00                           | 1.09                         | 0.99                                                    |
| >2047                                 | bioA            | SAUR2634 (SAR_RS13170)  | 0.00                              | 1.69                            | 1.47                                                       | 0.00                           | 1.69                         | 1.47                                                    | 0.00                           | 1.69                         | 1.47                                                    |
| >2048                                 | bioD            | SAUR2635 (SAR_RS13175)  | 0.00                              | 3.97                            | 1.42                                                       | 0.00                           | 3.97                         | 1.42                                                    | 0.00                           | 3.97                         | 1.42                                                    |
| >2049                                 | QSHDC6-L1       | SAUR2637 (SAR_RS13185)  | 0.00                              | >5.00                           | 0.00                                                       | 0.00                           | >5.00                        | 0.00                                                    | 0.00                           | >5.00                        | 0.00                                                    |
| >2050                                 | msbA3           | (N/A)                   | 0.00                              | 2.48                            | >5.00                                                      | 0.00                           | 2.48                         | >5.00                                                   | 0.00                           | 2.48                         | >5.00                                                   |
| >2051                                 | msbA4           | (N/A)                   | 0.06                              | >5.00                           | >5.00                                                      | 0.00                           | >5.00                        | >5.00                                                   | 0.00                           | >5.00                        | >5.00                                                   |
| >2052                                 | QSHDC6-L2       | SAUR2640 (SAR_RS13200)  | 0.00                              | 0.93                            | 0.00                                                       | 0.00                           | 0.93                         | 0.00                                                    | 0.00                           | 0.93                         | 0.00                                                    |
| >2053                                 | ldr_fst_L2      | (N/A)                   | 0.00                              | 0.00                            | 0.00                                                       | 0.00                           | 0.00                         | 0.00                                                    | 0.00                           | 0.00                         | 0.00                                                    |
| >2054                                 | gtrA+gtxA       | SAUR2642 (SAR_RS13210)  | 0.26                              | 2.84                            | 0.26                                                       | 0.52                           | 3.10                         | 0.52                                                    | 0.26                           | 2.84                         | 0.26                                                    |
| >2055                                 | glxK1           | SAUR2643 (SAR_RS13215)  | 0.00                              | 0.52                            | 0.96                                                       | 0.09                           | 0.61                         | 1.05                                                    | 0.00                           | 0.52                         | 0.96                                                    |
| >2056                                 | QSHDC0          | SAUR2644 (SAR_RS13220)  | 0.00                              | 1.97                            | 0.91                                                       | 0.15                           | 2.12                         | 1.06                                                    | 0.00                           | 1.97                         | 0.91                                                    |
| >2057                                 | bcr             | SAUR2645 (SAR_RS13225)  | 0.00                              | 1.32                            | 0.41                                                       | 0.00                           | 1.32                         | 0.41                                                    | 0.00                           | 1.32                         | 0.41                                                    |
| >2058                                 | narP            | SAUR2646 (SAR_RS13230)  | 0.00                              | 0.00                            | 0.00                                                       | 0.00                           | 0.00                         | 0.21                                                    | 0.00                           | 0.00                         | 0.21                                                    |
| >2059                                 | QSHDB7          | SAUR2647 (SAR_RS13235)  | 0.15                              | 1.07                            | 1.22                                                       | 0.46                           | 1.22                         | 0.61                                                    | 1.22                           | 1.22                         | 0.61                                                    |
| >2060                                 | QSHDB6          | SAUR2648 (SAR_RS13240)  | 0.00                              | >5.00                           | 0.25                                                       | 0.00                           | >5.00                        | 0.25                                                    | 0.00                           | >5.00                        | 0.25                                                    |
| >2061                                 | aapA3+cyxA      | SAUR2649 (SAR_RS13245)  | 0.00                              | 1.06                            | 0.57                                                       | 0.07                           | 1.13                         | 0.64                                                    | 0.00                           | 1.06                         | 0.57                                                    |
| >2062                                 | nhaK2           | SAUR2650 (SAR_RS13250)  | 0.00                              | 1.25                            | 0.43                                                       | 0.00                           | 1.25                         | 0.43                                                    | 0.05                           | 1.30                         | 0.48                                                    |
| >2063                                 | ydaO            | SAUR2652 (SAR_RS13260)  | 0.00                              | 0.98                            | 0.16                                                       | 0.00                           | 0.98                         | 0.16                                                    | 0.00                           | 0.98                         | 0.16                                                    |
| >2064                                 | flp-fmtA2       | SAUR2654 (SAR_RS13270)  | 0.00                              | 4.00                            | 2.00                                                       | 0.00                           | 4.00                         | 2.00                                                    | 0.00                           | 4.00                         | 2.00                                                    |
| >2065                                 | rhdA            | SAUR2655 (SAR_RS13275)  | 0.00                              | 0.59                            | 0.70                                                       | 0.00                           | 0.59                         | 0.70                                                    | 0.00                           | 0.59                         | 0.70                                                    |
| >2066                                 | panE1           | SAUR2657 (SAR_RS13285)  | 0.20                              | 1.29                            | 1.11                                                       | 0.00                           | 1.29                         | 1.11                                                    | 0.00                           | 1.29                         | 1.11                                                    |
| >2067                                 | mmr-norB        | SAUR2658 (SAR_RS13290)  | 0.07                              | 1.14                            | 0.21                                                       | 0.00                           | 1.07                         | 0.14                                                    | 0.00                           | 1.07                         | 0.14                                                    |
| >2068                                 | opuCD           | SA                      |                                   |                                 |                                                            |                                |                              |                                                         |                                |                              |                                                         |

| Number/<br>Position in<br>the figures | Gene ID        | ID in PubMLST cg scheme | ED133 vs. swan<br>isolate 15V8707 | X22 vs. swan isolate<br>15V8707 | CC522 goat isolate<br>17CS1042 vs. swan<br>isolate 15V8707 | ED133 vs. duck<br>isolate V315 | X22 vs. duck isolate<br>V315 | CC522 goat isolate<br>17CS1042 vs. duck<br>isolate V315 | ED133 vs. duck<br>isolate V482 | X22 vs. duck isolate<br>V482 | CC522 goat isolate<br>17CS1042 vs. duck<br>isolate V482 |
|---------------------------------------|----------------|-------------------------|-----------------------------------|---------------------------------|------------------------------------------------------------|--------------------------------|------------------------------|---------------------------------------------------------|--------------------------------|------------------------------|---------------------------------------------------------|
| >2120                                 | Q1Y5K2         | SAUR2726 (SAR_R513630)  | 0.00                              | 1.85                            | 0.74                                                       | 0.00                           | 1.85                         | 0.74                                                    | 0.09                           | 1.94                         | 0.83                                                    |
| >2121                                 | Q1Y5K1         | SAUR2727 (SAR_R513635)  | 0.00                              | 2.53                            | 1.01                                                       | 0.17                           | 2.69                         | 1.18                                                    | 0.00                           | 2.53                         | 1.01                                                    |
| >2122                                 | mhgA-2         | SAUR2728 (SAR_R513640)  | 0.10                              | 2.27                            | 1.44                                                       | 0.00                           | 2.17                         | 1.34                                                    | 0.10                           | 2.27                         | 1.44                                                    |
| >2123                                 | mhgR           | SAUR2729 (SAR_R513645)  | 0.23                              | 0.46                            | 0.23                                                       | 0.23                           | 0.46                         | 0.23                                                    | 0.23                           | 0.46                         | 0.23                                                    |
| >2124                                 | QSHD32         | SAUR2730 (SAR_R513650)  | 0.00                              | 2.81                            | 0.00                                                       | 0.00                           | 2.81                         | 0.00                                                    | 0.00                           | 2.81                         | 0.00                                                    |
| >2125                                 | catE           | SAUR2731 (SAR_R513655)  | 0.25                              | 1.49                            | 1.49                                                       | 0.00                           | 1.24                         | 1.24                                                    | 0.00                           | 1.24                         | 1.24                                                    |
| >2126                                 | frp            | SAUR2732 (SAR_R513660)  | 0.15                              | 1.19                            | 1.04                                                       | 0.15                           | 1.19                         | 1.04                                                    | 0.15                           | 1.19                         | 1.04                                                    |
| >2127                                 | ldhD-ddh_L1    | SAUR2733 (SAR_R513665)  | 0.10                              | 0.60                            | 0.60                                                       | 0.10                           | 0.60                         | 0.60                                                    | 0.10                           | 0.60                         | 0.60                                                    |
| >2128                                 | ywtE           | SAUR2736 (SAR_R513680)  | 0.00                              | 3.00                            | 1.62                                                       | 0.00                           | 3.00                         | 1.62                                                    | 0.00                           | 3.00                         | 1.62                                                    |
| >2129                                 | srfA           | SAUR2737 (SAR_R513685)  | 0.00                              | 0.48                            | 0.00                                                       | 0.00                           | 0.48                         | 0.00                                                    | 0.00                           | 0.48                         | 0.00                                                    |
| >2130                                 | ywhHymcA       | SAUR2738 (SAR_R513690)  | 0.20                              | 1.63                            | 0.61                                                       | 0.20                           | 1.62                         | 0.61                                                    | 0.20                           | 1.61                         | 0.61                                                    |
| >2131                                 | sdaA           | SAUR2741 (SAR_R513705)  | 0.00                              | 0.78                            | 0.56                                                       | 0.00                           | 0.78                         | 0.56                                                    | 0.00                           | 0.78                         | 0.56                                                    |
| >2132                                 | sdaB           | SAUR2742 (SAR_R513710)  | 0.00                              | 0.44                            | 0.00                                                       | 0.00                           | 0.44                         | 0.00                                                    | 0.00                           | 0.44                         | 0.00                                                    |
| >2133                                 | ptsEIIc        | SAUR2743 (SAR_R513715)  | 0.00                              | 0.29                            | 0.67                                                       | 0.00                           | 0.29                         | 0.67                                                    | 0.00                           | 0.29                         | 0.67                                                    |
| >2134                                 | QSHD18         | SAUR2744 (SAR_R513720)  | 0.00                              | 0.49                            | 0.00                                                       | 0.00                           | 0.49                         | 0.00                                                    | 0.00                           | 0.49                         | 0.00                                                    |
| >2135                                 | ydeD-yicL      | (N/A)                   | 0.00                              | 0.86                            | 1.40                                                       | 0.22                           | 1.08                         | 1.62                                                    | 0.00                           | 0.86                         | 1.40                                                    |
| >2136                                 | acpA           | SAUR2746 (SAR_R513730)  | 0.00                              | 1.55                            | 0.52                                                       | 0.10                           | 1.65                         | 0.62                                                    | 0.00                           | 1.55                         | 0.52                                                    |
| >2137                                 | QSHD15         | SAUR2747 (SAR_R513735)  | 0.00                              | 0.28                            | 0.28                                                       | 0.00                           | 0.28                         | 0.28                                                    | 0.00                           | 0.28                         | 0.28                                                    |
| >2138                                 | QSHD14         | SAUR2748 (SAR_R513740)  | 0.00                              | 1.46                            | 0.49                                                       | 0.00                           | 1.46                         | 0.49                                                    | 0.00                           | 1.46                         | 0.49                                                    |
| >2139                                 | glcB-ptsG      | SAUR2749 (SAR_R513745)  | 0.00                              | 1.16                            | 0.87                                                       | 0.15                           | 1.31                         | 1.02                                                    | 0.00                           | 1.16                         | 0.87                                                    |
| >2140                                 | cidC-pox       | SAUR2750 (SAR_R513750)  | 0.06                              | 4.37                            | 0.40                                                       | 0.11                           | 4.43                         | 0.46                                                    | 0.06                           | 4.37                         | 0.40                                                    |
| >2141                                 | cidB           | SAUR2751 (SAR_R513755)  | 0.00                              | 0.72                            | 4.06                                                       | 0.00                           | 0.72                         | 4.06                                                    | 0.00                           | 0.72                         | 4.06                                                    |
| >2142                                 | cidA           | SAUR2752 (SAR_R513760)  | 0.00                              | 0.76                            | >=5.00                                                     | 0.00                           | 0.76                         | >=5.00                                                  | 0.00                           | 0.76                         | >=5.00                                                  |
| >2143                                 | cdhA           | SAUR2753 (SAR_R513765)  | 0.00                              | 0.46                            | 0.11                                                       | 0.00                           | 0.46                         | 0.11                                                    | 0.11                           | 0.57                         | 0.23                                                    |
| >2144                                 | Q2FV82         | (N/A)                   | 0.00                              | 0.23                            | 0.00                                                       | 0.00                           | 0.00                         | 0.00                                                    | 0.00                           | 0.00                         | 0.00                                                    |
| >2145                                 | ssaA4          | SAUR2755 (SAR_R513775)  | 0.23                              | 0.23                            | 0.23                                                       | 0.23                           | 0.23                         | 0.23                                                    | 0.23                           | 0.23                         | 0.23                                                    |
| >2146                                 | mmaA           | SAUR2756 (SAR_R513780)  | 0.00                              | 4.76                            | 0.70                                                       | 0.00                           | 4.76                         | 0.70                                                    | 0.08                           | 4.84                         | 0.78                                                    |
| >2147                                 | mmaS           | SAUR2757 (SAR_R513785)  | 0.09                              | 2.74                            | 0.00                                                       | 0.09                           | 2.74                         | 0.00                                                    | 0.09                           | 2.74                         | 0.00                                                    |
| >2148                                 | adaB           | SAUR2758 (SAR_R513790)  | 0.00                              | 2.49                            | 1.34                                                       | 0.00                           | 2.49                         | 1.34                                                    | 0.00                           | 2.49                         | 1.34                                                    |
| >2149                                 | clpL           | SAUR2759 (SAR_R513795)  | 0.09                              | >=5.00                          | 1.66                                                       | 0.05                           | >=5.00                       | 1.61                                                    | 0.05                           | >=5.00                       | 1.61                                                    |
| >2150                                 | A8Z3E9         | (N/A)                   | 0.00                              | 4.07                            | 1.74                                                       | 0.00                           | 4.07                         | 1.74                                                    | 0.00                           | 4.07                         | 1.74                                                    |
| >2151                                 | feoB           | (N/A)                   | 0.00                              | 1.15                            | 0.35                                                       | 0.00                           | 1.15                         | 0.35                                                    | 0.00                           | 1.15                         | 0.35                                                    |
| >2152                                 | feoA           | SAUR3013                | 0.08                              | 0.88                            | 0.88                                                       | 0.08                           | 0.88                         | 0.88                                                    | 0.44                           | 1.32                         | 1.32                                                    |
| >2153                                 | mmpL-ufarE     | SAUR3014                | 0.00                              | >=5.00                          | >=5.00                                                     | 0.04                           | >=5.00                       | >=5.00                                                  | 0.00                           | >=5.00                       | >=5.00                                                  |
| >2154                                 | Q8NUR3=farR    | SAUR2764 (SAR_R513820)  | 0.00                              | >=5.00                          | 0.73                                                       | 0.00                           | >=5.00                       | 0.73                                                    | 0.00                           | >=5.00                       | >=5.00                                                  |
| >2155                                 | QSHC27         | SAUR2765 (SAR_R513825)  | 0.00                              | 1.19                            | 2.38                                                       | 0.00                           | 1.19                         | 2.38                                                    | >=5.00                         | >=5.00                       | >=5.00                                                  |
| >2156                                 | rocA-pruA      | SAUR2766 (SAR_R513830)  | 0.00                              | 1.29                            | 0.71                                                       | 0.00                           | 1.29                         | 0.71                                                    | 0.00                           | 1.29                         | 0.71                                                    |
| >2157                                 | mpa            | SAUR2767 (SAR_R513835)  | 0.00                              | >=5.00                          | 2.00                                                       | 0.00                           | >=5.00                       | 2.00                                                    | 0.00                           | >=5.00                       | 2.00                                                    |
| >2158                                 | cwiA           | SAUR2768 (SAR_R513840)  | 0.00                              | 3.13                            | 0.00                                                       | 0.00                           | 3.13                         | 0.00                                                    | 0.00                           | 3.13                         | 0.00                                                    |
| >2159                                 | caa            | SAUR2769 (SAR_R513845)  | 0.08                              | 0.87                            | 0.46                                                       | 0.08                           | 0.86                         | 0.46                                                    | 0.12                           | 0.91                         | 0.50                                                    |
| >2160                                 | copZ           | SAUR2770 (SAR_R513850)  | 0.00                              | 0.97                            | 0.48                                                       | 0.00                           | 0.97                         | 0.48                                                    | 0.00                           | 0.97                         | 0.48                                                    |
| >2161                                 | ldhD-ddh_L2    | SAUR2771 (SAR_R513855)  | >=5.00                            | >=5.00                          | >=5.00                                                     | 0.10                           | 0.60                         | 0.70                                                    | >=5.00                         | >=5.00                       | >=5.00                                                  |
| >2162                                 | ywfG           | SAUR2772 (SAR_R513860)  | 0.00                              | 1.99                            | 0.61                                                       | 0.00                           | 1.99                         | 0.61                                                    | 0.00                           | 1.99                         | 0.61                                                    |
| >2163                                 | crfN           | SAUR2773 (SAR_R513865)  | 0.00                              | 1.72                            | 0.66                                                       | 0.00                           | 1.72                         | 0.66                                                    | 0.00                           | 1.72                         | 0.66                                                    |
| >2164                                 | crfM           | SAUR2774 (SAR_R513870)  | 0.12                              | 0.93                            | 0.46                                                       | 0.00                           | 0.81                         | 0.35                                                    | 0.00                           | 0.81                         | 0.35                                                    |
| >2165                                 | crfQ           | SAUR2775 (SAR_R513875)  | 0.06                              | 1.06                            | 0.35                                                       | 0.00                           | 1.06                         | 0.35                                                    | 0.00                           | 1.06                         | 0.35                                                    |
| >2166                                 | crfP           | SAUR2776 (SAR_R513880)  | 0.00                              | 1.14                            | 0.33                                                       | 0.00                           | 1.14                         | 0.33                                                    | 0.07                           | 1.20                         | 0.40                                                    |
| >2167                                 | crfO           | SAUR2777 (SAR_R513885)  | 0.00                              | 2.61                            | 1.00                                                       | 0.00                           | 2.61                         | 1.00                                                    | 0.00                           | 2.61                         | 1.00                                                    |
| >2168                                 | ssaA1          | SAUR2778 (SAR_R513890)  | 0.00                              | 1.69                            | 0.52                                                       | 0.00                           | 1.69                         | 0.52                                                    | 0.00                           | 1.69                         | 0.52                                                    |
| >2169                                 | oatA           | SAUR2779 (SAR_R513895)  | 0.00                              | 1.88                            | 0.94                                                       | 0.00                           | 1.88                         | 0.94                                                    | 0.00                           | 1.88                         | 0.94                                                    |
| >2170                                 | isaA           | SAUR2780 (SAR_R513900)  | 0.00                              | 0.71                            | 0.00                                                       | 0.14                           | 0.85                         | 0.14                                                    | 0.00                           | 0.71                         | 0.00                                                    |
| >2171                                 | QSHCY0         | SAUR2781 (SAR_R513905)  | 0.00                              | 1.14                            | 0.09                                                       | 0.00                           | 1.14                         | 0.09                                                    | 0.00                           | 1.14                         | 0.09                                                    |
| >2172                                 | acpA           | (N/A)                   | 0.00                              | 1.23                            | 0.53                                                       | 0.18                           | 1.40                         | 0.70                                                    | 0.00                           | 1.23                         | 0.53                                                    |
| >2173                                 | QSHCX8         | SAUR2784 (SAR_R513920)  | 0.00                              | 3.28                            | 1.00                                                       | 0.00                           | 3.28                         | 1.00                                                    | 0.00                           | 3.28                         | 1.00                                                    |
| >2174                                 | yznYc          | SAUR2785 (SAR_R513925)  | 0.00                              | 0.87                            | 1.30                                                       | 0.43                           | 1.30                         | 1.73                                                    | 0.00                           | 0.87                         | 1.30                                                    |
| >2175                                 | QSHCX6         | SAUR2786 (SAR_R513930)  | 0.00                              | 0.79                            | 0.26                                                       | 0.00                           | 0.79                         | 0.26                                                    | 0.00                           | 0.79                         | 0.26                                                    |
| >2176                                 | nmrA           | SAUR2787 (SAR_R513935)  | 0.00                              | 0.85                            | 0.24                                                       | 0.00                           | 0.85                         | 0.24                                                    | 0.00                           | 0.85                         | 0.24                                                    |
| >2177                                 | QSHCX4=DUF2316 | SAUR2788 (SAR_R513940)  | 0.00                              | 2.00                            | 0.33                                                       | 0.00                           | 2.00                         | 0.33                                                    | 0.00                           | 2.00                         | 0.33                                                    |
| >2178                                 | gbaA           | SAUR2789 (SAR_R513945)  | 0.00                              | >=5.00                          | 0.18                                                       | 0.00                           | >=5.00                       | 0.18                                                    | 0.00                           | >=5.00                       | 0.18                                                    |
| >2179                                 | gbaB           | SAUR2790 (SAR_R513950)  | 0.00                              | 2.27                            | 3.95                                                       | 0.00                           | 2.13                         | 3.40                                                    | 0.00                           | 2.13                         | 3.40                                                    |
| >2180                                 | QSHCX0         | SAUR2791 (SAR_R513955)  | 0.00                              | 1.19                            | 1.78                                                       | 0.00                           | 1.19                         | 1.78                                                    | 0.00                           | 1.19                         | 1.78                                                    |
| >2181                                 | yrak           | SAUR2792 (SAR_R513960)  | >=5.00                            | >=5.00                          | >=5.00                                                     | 0.00                           | 1.20                         | 0.36                                                    | 0.00                           | 1.20                         | 0.36                                                    |
| >2182                                 | cobW3          | SAUR2793 (SAR_R513965)  | 0.00                              | 2.69                            | 0.79                                                       | 0.11                           | 2.81                         | 0.90                                                    | 0.67                           | 2.92                         | 1.23                                                    |
| >2183                                 | Q6GDL8=fcoB    | SAUR2794 (SAR_R513970)  | 0.15                              | >=5.00                          | >=5.00                                                     | 0.15                           | >=5.00                       | >=5.00                                                  | >=5.00                         | 1.41                         | 0.59                                                    |
| >2184                                 | QSHCW6         | SAUR2795 (SAR_R513975)  | 0.00                              | 1.17                            | 0.90                                                       | 0.09                           | 1.26                         | 0.99                                                    | 0.81                           | 0.72                         | 0.09                                                    |
| >2185                                 | DUF4176=esaC   | SAUR2796 (SAR_R513980)  | 0.00                              | 0.34                            | 1.01                                                       | 0.00                           | 0.34                         | 1.01                                                    | 1.01                           | 1.35                         | 0.00                                                    |
| >2186                                 | Q8NUP1         | SAUR2797 (SAR_R513985)  | 0.00                              | >=5.00                          | >=5.00                                                     | 0.00                           | >=5.00                       | >=5.00                                                  | 0.00                           | >=5.00                       | >=5.00                                                  |
| >2187                                 | Q8NUP0         | SAUR2798 (SAR_R513990)  | 0.00                              | 4.35                            | 0.36                                                       | 0.00                           | 4.35                         | 0.36                                                    | 0.00                           | 4.35                         | 0.36                                                    |
| >2188                                 | Q8NUN9         | SAUR2799 (SAR_R513995)  | 0.00                              | 2.54                            | 1.04                                                       | 0.12                           | 2.65                         | 1.15                                                    | 1.04                           | 1.96                         | 0.00                                                    |
| >2189                                 | pyrD           | SAUR2800 (SAR_R514000)  | 0.00                              | 0.75                            | 0.09                                                       | 0.00                           | 0.75                         | 0.09                                                    | 0.19                           | 0.75                         | 0.09                                                    |
| >2190                                 | QSHCW0         | SAUR2801 (SAR_R514005)  | 0.00                              | 0.72                            | 0.72                                                       | 0.00                           | 0.72                         | 0.72                                                    | 0.72                           | 0.00                         | 0.00                                                    |
| >2191                                 | DUF0208=queH   | SAUR2802 (SAR_R514010)  | 0.00                              | 0.14                            | 0.00                                                       | 0.14                           | 0.28                         | 0.14                                                    | 0.00                           | 0.14                         | 0.00                                                    |
| >2192                                 | QSHCV8         | SAUR2803 (SAR_R514015)  | 0.00                              | 1.33                            | 0.44                                                       | 0.00                           | 1.33                         | 0.44                                                    | 0.04                           | 0.89                         | 0.00                                                    |
| >2193                                 | pepX           | SAUR2806 (SAR_R514030)  | 0.00                              | 1.07                            | 0.59                                                       | 0.00                           | 1.07                         | 0.59                                                    | 0.59                           | 0.44                         | 0.12                                                    |
| >2194                                 | panD           | SAUR2807 (SAR_R514040)  | 0.00                              | 0.52                            | 0.00                                                       | 0.00                           | 0.52                         | 0.00                                                    | 0.00                           | 0.52                         | 0.00                                                    |
| >2195                                 | panC           | SAUR2808 (SAR_R514040)  | 0.00                              | 0.35                            | 0.12                                                       | 0.12                           | 0.47                         | 0.23                                                    | 0.35                           | 0.70                         | 0.23                                                    |
| >2196                                 | panB           | SAUR2809 (SAR_R514045)  | 0.00                              | 4.15                            | 3.41                                                       | 0.00                           | 4.15                         | 3.41                                                    | 0.00                           | 4.15                         | 3.41                                                    |
| >2197                                 | panE2          | SAUR2810 (SAR_R514050)  | 0.00                              | 1.28                            | 0.00                                                       | 0.00                           | 1.28                         | 0.00                                                    | 0.00                           | 1.28                         | 0.00                                                    |
| >2198                                 | alsD-L2=budA   | SAUR2811 (SAR_R514055)  | 0.14                              | 0.14                            | 0.28                                                       | 0.14                           | 0.14                         | 0.28                                                    | 0.43                           | 0.43                         | 0.28                                                    |
| >2199                                 | ldhZ           | SAUR2812 (SAR_R514060)  | 0.00                              | 0.42                            | 0.21                                                       | 0.00                           | 0.42                         | 0.21                                                    | 0.21                           | 0.63                         | 0.21                                                    |
| >2200                                 | yfmI=phgP      | SAUR2814 (SAR_R514070)  | 0.00                              | 0.69                            | 0.25                                                       | 0.07                           | 0.69                         | 0.35                                                    | 0.47                           | 0.83                         | 0.07                                                    |
| >2201                                 | yshA=gabT      | SAUR2815 (SAR_R514075)  | 0.00                              | 1.49                            | 1.49                                                       | 0.00                           | 1.49                         | 0.67                                                    | 0.67                           | 1.12                         | 0.00                                                    |
| >2202                                 | QSHCU7         | SAUR2816 (SAR_R514080)  | 0.00                              | 1.44                            | 2.16                                                       | >=5.00                         | >=5.00                       | >=5.00                                                  | 2.16                           | 1.68                         | 0.00                                                    |
| >2203                                 | lda            | SAUR2817 (SAR_R514085)  | 0.11                              | 2.92                            | >=5.00                                                     | 0.11                           | 2.92                         | >=5.00                                                  | >=5.00                         | >=5.00                       | 0.00                                                    |
| >2204                                 | lqo            | SAUR2818 (SAR_R514090)  | 0.07                              | 0.60                            | 0.47                                                       | 0.07                           | 0.60                         | 0.47                                                    | 0.53                           | 0.27                         | 0.00                                                    |
| >2205                                 | acsA2-bclA     | SAUR2820 (SAR_R514100)  | 0.00                              | 0.94                            | 0.56                                                       | 0.00                           | 0.94                         | 0.56                                                    | 0.56                           | 1.25                         | 0.00                                                    |
| >2206                                 | QSHCU3         | SAUR2821 (SAR_R514105)  | 0.00                              | 2.70                            | 2.03                                                       | 0.00                           | 2.70                         | 2.03                                                    | 0.03                           | 1.58                         | 0.00                                                    |
| >2207                                 | QSHCU2         | SAUR2822 (SAR_R514110)  | 0.00                              | 0.47                            | 0.47                                                       | 0.00                           | 0.47                         | 0.47                                                    | 0.47                           | 0.00                         | 0.00                                                    |
| >2208                                 | betA           | SAUR2823 (SAR_R514115)  | 0.00                              | 0.53                            | 0.29                                                       | 0.00                           | 0.53                         | 0.29                                                    | >=5.00                         | >=5.00                       | >=5.00                                                  |
| >2209                                 | betB           | SAUR2824 (SAR_R514120)  | 0.07                              | 0.60                            | 0.27                                                       | 0.07                           | 0.60                         | 0.27                                                    | 0.27                           | 0.67                         | 0.07                                                    |
| >2210                                 | A8Z5A6         | SAUR2825 (SAR_R514125)  | 0.00                              | 0.00                            | 0.00                                                       | 0.00                           | 0.00                         | 0.00                                                    | 0.00                           | 0.00                         | 0.00                                                    |
| >2211                                 | Q792X2=ccdC    | SAUR2826 (SAR_R514130)  | 0.00                              | 0.18                            | 0.53                                                       | 0.00                           | 0.18                         | 0.53                                                    | 0.53                           | 0.71                         | 0.00                                                    |
| >2212                                 | cutD           | SAUR2827 (SAR_R514135)  | 0.00                              | 1.48                            | 1.17                                                       | 1.23                           | 0.49                         | 0.18                                                    | 0.00                           | 1.48                         | 1.17                                                    |
| >2213                                 | nrdG           | SAUR2830 (SAR_R514150)  | 0.00                              | 0.56                            | 0.00                                                       | 0.00                           | 0.56                         | 0.00                                                    | 0.00                           | 0.56                         | 0.00                                                    |
| >2214                                 | mrdD           | SAUR2831 (SAR_R514155)  | 0.05                              | 1.08                            | 0.32                                                       | 0.00                           | 1.03                         | 0.27                                                    | 0.00                           | 1.08                         | 0.11                                                    |
| >2215                                 | ctfM           | SAUR2832 (SAR_R514160)  | 0.00                              | 1.97                            | 0.00                                                       | 0.00                           |                              |                                                         |                                |                              |                                                         |

| Number/<br>Position in the<br>figures | Gene ID      | ID in PubMedLST qc scheme | ED133 vs. swan<br>isolate 15V8707 | X22 vs. swan isolate<br>15V8707 | CC522 goat isolate<br>17CS1042 vs. swan<br>isolate 15V8707 | ED133 vs. duck<br>isolate V315 | X22 vs. duck isolate<br>V315 | CC522 goat isolate<br>17CS1042 vs. duck<br>isolate V315 | ED133 vs. duck<br>isolate V482 | X22 vs. duck isolate<br>V482 | CC522 goat isolate<br>17CS1042 vs. duck<br>isolate V482 |
|---------------------------------------|--------------|---------------------------|-----------------------------------|---------------------------------|------------------------------------------------------------|--------------------------------|------------------------------|---------------------------------------------------------|--------------------------------|------------------------------|---------------------------------------------------------|
| >2268                                 | lip1         | SAUR2893 [SAR_RS14465]    | 0.10                              | 1.27                            | 0.59                                                       | 0.64                           | 1.13                         | 0.15                                                    | 0.69                           | 1.17                         | 0.20                                                    |
| >2269                                 | his1         | SAUR2895 [SAR_RS14475]    | 0.00                              | 0.95                            | 1.26                                                       | 0.00                           | 0.95                         | 0.00                                                    | 1.26                           | 0.95                         | 0.00                                                    |
| >2270                                 | hisF         | SAUR2896 [SAR_RS14480]    | 0.13                              | 2.61                            | 1.58                                                       | 1.71                           | 2.64                         | 0.00                                                    | 1.84                           | 2.77                         | 0.13                                                    |
| >2271                                 | hisA         | SAUR2897 [SAR_RS14485]    | 0.00                              | 2.98                            | 5.13                                                       | 1.13                           | 2.13                         | 0.00                                                    | 1.13                           | 2.13                         | 0.00                                                    |
| >2272                                 | hisH         | SAUR2898 [SAR_RS14490]    | 0.00                              | 0.00                            | 0.13                                                       | 0.35                           | 0.00                         | 0.46                                                    | 0.35                           | 0.42                         | 0.00                                                    |
| >2273                                 | hisB         | SAUR2899 [SAR_RS14495]    | 1.21                              | 3.28                            | >=5.00                                                     | 1.38                           | 3.11                         | >=5.00                                                  | 1.38                           | 3.11                         | >=5.00                                                  |
| >2274                                 | hisC1        | SAUR2900 [SAR_RS14500]    | 2.17                              | 2.96                            | 0.00                                                       | 2.17                           | 2.96                         | 0.00                                                    | 2.17                           | 2.96                         | 0.00                                                    |
| >2275                                 | hisD         | SAUR2901 [SAR_RS14505]    | 1.52                              | 1.76                            | 0.16                                                       | 1.52                           | 1.76                         | 0.16                                                    | 1.44                           | 1.68                         | 0.08                                                    |
| >2276                                 | hisG         | SAUR2902 [SAR_RS14510]    | 0.81                              | >=5.00                          | 0.16                                                       | 0.81                           | >=5.00                       | 0.16                                                    | 0.81                           | >=5.00                       | 0.16                                                    |
| >2277                                 | hisZ         | SAUR2903 [SAR_RS14515]    | 0.85                              | 1.22                            | 0.00                                                       | 0.85                           | 1.22                         | 0.00                                                    | 0.98                           | 1.34                         | 0.12                                                    |
| >2278                                 | QSHCL6       | SAUR2904 [SAR_RS14520]    | 0.53                              | 1.16                            | 0.09                                                       | 0.53                           | 1.16                         | 0.09                                                    | 0.53                           | 1.16                         | 0.09                                                    |
| >2279                                 | QSHCL5       | (N/A)                     | >=5.00                            | 0.00                            | 0.00                                                       | >=5.00                         | 0.00                         | 0.00                                                    | >=5.00                         | 0.00                         | 0.00                                                    |
| >2280                                 | ycel         | SAUR2910 [SAR_RS14550]    | 1.16                              | >=5.00                          | 0.00                                                       | 1.16                           | >=5.00                       | 0.00                                                    | 1.16                           | >=5.00                       | 0.00                                                    |
| >2281                                 | drp35        | (N/A)                     | 2.57                              | 4.63                            | 0.10                                                       | 2.57                           | 4.63                         | 0.10                                                    | 2.88                           | 4.94                         | 0.41                                                    |
| >2282                                 | QSHCK8       | SAUR2912 [SAR_RS14560]    | 1.15                              | 2.30                            | 0.00                                                       | 1.15                           | 2.30                         | 0.00                                                    | 1.15                           | 2.30                         | 0.00                                                    |
| >2283                                 | pcp          | SAUR2913 [SAR_RS14565]    | 0.63                              | >=5.00                          | 0.31                                                       | 0.47                           | >=5.00                       | 0.16                                                    | 0.47                           | >=5.00                       | 0.16                                                    |
| >2286                                 | QZFUS3-bstA  | SAUR2914 [SAR_RS14570]    | 1.51                              | 2.37                            | 0.00                                                       | 1.51                           | 2.37                         | 0.00                                                    | 1.51                           | 2.37                         | 0.00                                                    |
| >2287                                 | cna          | (N/A)                     | >=5.00                            | >=5.00                          | >=5.00                                                     | >=5.00                         | >=5.00                       | 0.43                                                    | >=5.00                         | >=5.00                       | >=5.00                                                  |
| >2288                                 | Q7WS08-cdtF  | SAUR2916 [SAR_RS14580]    | 1.27                              | >=5.00                          | 0.00                                                       | 1.27                           | >=5.00                       | 0.00                                                    | 1.27                           | >=5.00                       | 0.00                                                    |
| >2289                                 | vraD         | SAUR2917 [SAR_RS14585]    | 1.21                              | 1.76                            | 0.11                                                       | 1.21                           | 1.65                         | 0.16                                                    | 1.16                           | 1.76                         | 0.11                                                    |
| >2290                                 | QSHCK1       | SAUR2918 [SAR_RS14590]    | 2.60                              | 1.04                            | 0.17                                                       | 2.60                           | 1.04                         | 0.17                                                    | 2.60                           | 1.04                         | 0.17                                                    |
| >2291                                 | nixA         | (N/A)                     | 0.29                              | 1.57                            | 0.39                                                       | 0.29                           | 1.57                         | 0.39                                                    | 0.29                           | 1.57                         | 0.39                                                    |
| >2292                                 | QSHC9-mhoA   | SAUR2920 [SAR_RS14600]    | 3.66                              | >=5.00                          | 0.12                                                       | 3.54                           | >=5.00                       | 0.00                                                    | 3.54                           | >=5.00                       | 0.00                                                    |
| >2293                                 | hdeD         | SAUR2921 [SAR_RS14605]    | 0.39                              | >=5.00                          | 0.00                                                       | 0.39                           | >=5.00                       | 0.00                                                    | 0.39                           | >=5.00                       | 0.00                                                    |
| >2294                                 | vraO         | SAUR2922 [SAR_RS14610]    | 0.92                              | 0.79                            | 0.00                                                       | 0.92                           | 0.79                         | 0.00                                                    | 0.92                           | 0.79                         | 0.00                                                    |
| >2295                                 | vraE         | SAUR2923 [SAR_RS14615]    | 1.38                              | 2.82                            | 0.05                                                       | 1.38                           | 2.82                         | 0.05                                                    | 1.38                           | 2.82                         | 0.05                                                    |
| >2296                                 | QSHCS-mvraH  | (N/A)                     | 2.60                              | 0.00                            | 0.00                                                       | 2.60                           | >=5.00                       | 0.00                                                    | 2.60                           | >=5.00                       | 0.00                                                    |
| >2297                                 | cspG-L3-cspB | (N/A)                     | 0.00                              | 0.00                            | 0.00                                                       | 0.00                           | 0.00                         | 0.00                                                    | 0.00                           | 0.00                         | 0.00                                                    |
| >2298                                 | QSHC9-nimmR  | SAUR2930 [SAR_RS14650]    | 1.23                              | >=5.00                          | 0.00                                                       | 1.23                           | >=5.00                       | 0.00                                                    | 1.23                           | >=5.00                       | 0.00                                                    |
| >2299                                 | DUF3147_L1   | (N/A)                     | >=5.00                            | >=5.00                          | >=5.00                                                     | >=5.00                         | >=5.00                       | >=5.00                                                  | >=5.00                         | >=5.00                       | >=5.00                                                  |
| >2300                                 | DUF3147_L2   | SAUR2932 [SAR_RS14660]    | 0.85                              | 3.67                            | 0.56                                                       | 0.56                           | 3.39                         | 0.28                                                    | 0.56                           | 3.39                         | 0.28                                                    |
| >2301                                 | noc-parB2    | SAUR2934 [SAR_RS14670]    | 0.36                              | 0.95                            | 0.12                                                       | 0.48                           | 1.07                         | 0.24                                                    | 0.36                           | 0.95                         | 0.12                                                    |
| >2302                                 | rsmG-gidB    | SAUR2935 [SAR_RS14675]    | 0.00                              | 0.00                            | 0.00                                                       | 0.14                           | 0.14                         | 0.14                                                    | 0.14                           | 0.14                         | 0.14                                                    |
| >2303                                 | mmmG-gidA    | SAUR2936 [SAR_RS14680]    | 0.00                              | 0.00                            | 0.00                                                       | 0.00                           | 0.00                         | 0.00                                                    | 0.00                           | 0.00                         | 0.00                                                    |
| >2304                                 | mmmE-trmE    | SAUR2937 [SAR_RS14685]    | 0.22                              | 0.58                            | 0.07                                                       | 0.14                           | 0.27                         | 0.05                                                    | 0.27                           | 0.58                         | 0.07                                                    |
| >2305                                 | rnpA         | SAUR2938 [SAR_RS14690]    | 0.00                              | 0.00                            | 0.00                                                       | 0.29                           | 0.29                         | 0.29                                                    | 0.29                           | 0.29                         | 0.29                                                    |
| >2306                                 | rnpH         | SAUR2939 [SAR_RS14695]    | 0.00                              | 0.00                            | 0.00                                                       | 0.00                           | 0.00                         | 0.00                                                    | 0.00                           | 0.00                         | 0.00                                                    |
