# Supplementary material for: Molecular Characterization of Chimeric Staphylococcus aureus Strains from Waterfowl
Source: MDPI journal article supplement (doi:10.3390/microorganisms12010096), 2024-01-03
Supplement: s1 [file s1]

**Supplemental file 4b:** Mapping of the avian prophages in study isolates and reference sequences. The numbers refer to the position in the prophage genome, and for the sake of comparability, genomes are shown with the integrase gene first, and counting starts with the start codon of the integrase genes. The actual positions in the *S. aureus* genome sequences are CC5-MSSA-ED98, CP001781.1 (2,041,199.. 2,087,963; rc); CC5-MSSA-SA01, CP053075.1 (2,081,890 to 2,128,654; rc); CC692-MSSA-X22, CP042650.1 (2,101,683..2,152,905; rc); CC692-MRSA-CKMM-401M, CP129360.1 (2,088,250..2,140,329; rc); CC692-MSSA-NCTC9546, UHAK01000002.1 (2,069,330 to 2,115,442; rc); 15V8707 (2,003,179.. 2,065,164; rc); 511525-22, Contigs 135 (from pos. 300 on), 150rc, 026, 165, 037; V315 (1,987,006.. 2,031,814; rc); IMT40427, Contigs 259 (from pos. 20 on), 011, 184rc, 222rc, 203rc, 069.

| Gene ID               | Function / description                                             | Locus-tags            | CC5-MSSA ED98 | CC5-MSSA SA01 | CC692-MSSA X22 | CC692-MRSA CKMM-401M | CC692-MSSA NCTC9546 | 15V8707     | 511525-22   | V315        | IMT40427    |
|-----------------------|--------------------------------------------------------------------|-----------------------|---------------|---------------|----------------|----------------------|---------------------|-------------|-------------|-------------|-------------|
| <i>int</i>            | integrase, lysogeny module                                         | SAAV_2070             | 1.. 1038      | 1.. 1038      | 1.. 1038       | 1.. 1038             | 1.. 1038            | 1.. 1038    | 1.. 1038    | 1.. 1038    | 1.. 1038    |
| -                     | conserved hypothetical protein                                     | SAAV_2069             | 1200.. 1526   | 1200.. 1526   | 1200.. 1526    | 1200.. 1526          | 1200.. 1526         | 1200.. 1526 | 1200.. 1526 | 1231.. 1557 | 1231.. 1557 |
| -                     | conserved hypothetical protein                                     | SAAV_2068             | 1539.. 1904   | 1539.. 1904   | -              | -                    | -                   | -           | -           | -           | -           |
| -                     | conserved hypothetical protein                                     | SAAV_2067             | 2244.. 2411   | 2244.. 2411   | 2245.. 2412    | 2244.. 2411          | 2245.. 2412         | 2245.. 2412 | 2245.. 2412 | 2275.. 2442 | 2275.. 2442 |
| -                     | conserved hypothetical protein                                     | SAAV_2066             | 2510.. 2863   | 2510.. 2863   | -              | -                    | -                   | -           | -           | -           | -           |
| -                     | conserved hypothetical protein                                     | SAAV_2065             | 3184.. 4068   | 3184.. 4068   | -              | -                    | -                   | -           | -           | -           | -           |
| -                     | conserved hypothetical protein                                     | SAAV_2064             | 4137.. 4583   | 4137.. 4583   | -              | -                    | -                   | -           | -           | -           | -           |
| DUF0955               | putative metallo-protease, lysogeny module                         | SAAV_2063, KMD47_gp05 | 4600.. 5061   | 4600.. 5061   | 3053.. 3514    | 3052.. 3513          | 3053.. 3514         | 3053.. 3514 | 3053.. 3514 | -           | -           |
| <i>rep</i>            | XRE family regulatory protein, lysogeny module                     | SAAV_2062             | 5074.. 5397   | 5074.. 5397   | -              | -                    | -                   | -           | -           | -           | -           |
| <i>repC_SAS0897</i>   | helix-turn-helix family protein, putative phage regulatory protein | SAS0897               | -             | -             | 3527.. 3856    | 3526.. 3855          | 3527.. 3856         | 3527.. 3856 | 3527.. 3856 | -           | -           |
| <i>repC_SAAV_2061</i> | putative Cro-like repressor, /helix-turn-helix family protein      | SAAV_2061             | 5561.. 5809   | 5561.. 5809   | -              | -                    | -                   | -           | -           | -           | -           |
| <i>ant</i>            | anti-repressor Ant                                                 | SAAV_2060, KMD47_gp08 | 5822.. 6265   | 5822.. 6265   | -              | -                    | -                   | -           | -           | -           | -           |
| <i>rinB_SAAV_2059</i> | transcriptional activator RinB, replication module                 | SAAV_2059             | 6280.. 6429   | 6280.. 6429   | -              | -                    | -                   | -           | -           | -           | -           |
| -                     | conserved hypothetical protein                                     | SAAV_2058             | 6470.. 6682   | 6470.. 6682   | -              | -                    | -                   | -           | -           | -           | -           |
| -                     | conserved hypothetical protein                                     | SAOV_0282             | -             | -             | 4162.. 4392    | 4161.. 4391          | 4469.. 4699         | 4469.. 4699 | 4469.. 4699 | -           | -           |
| Q931J5                | putative protein, phi PVL ORF 35-like protein, lysogeny module     | -                     | 6751.. 6948   | 6751.. 6948   | 4447.. 4644    | 4446.. 4643          | 4754.. 4951         | 4754.. 4951 | 4754.. 4951 | 5081.. 5278 | 5081.. 5278 |
| <i>rep</i>            | XRE family regulatory protein, lysogeny module                     | -                     | -             | -             | -              | -                    | 4008.. 4208         | 4008.. 4208 | 4008.. 4208 | -           | -           |
| -                     | putative protein                                                   | -                     | -             | -             | 3989.. 4165    | 3988.. 4164          | 4296.. 4472         | 4296.. 4472 | 4296.. 4472 | 6886.. 7062 | 6886.. 7062 |
| -                     | putative protein                                                   | -                     | -             | -             | 4162.. 4380    | 4161.. 4379          | 4469.. 4687         | 4469.. 4687 | 4469.. 4687 | 7059.. 7277 | 7059.. 7277 |
| -                     | conserved hypothetical protein                                     | SAAV_2057             | 7224.. 7367   | 7224.. 7367   | 5078.. 5221    | 5077.. 5220          | 5385.. 5528         | 5385.. 5528 | 5385.. 5528 | 5712.. 5855 | 5712.. 5855 |
| -                     | conserved hypothetical protein                                     | SAAV_2056, MW1928     | 7518.. 7838   | 7518.. 7838   | 5372.. 5692    | 5371.. 5691          | 5679.. 5999         | 5679.. 5999 | 5679.. 5999 | 7348.. 7668 | 7348.. 7668 |

| Gene ID                  | Function / description                                                                         | Locus-tags            | CC5-MSSA<br>ED98 | CC5-MSSA<br>SA01 | CC692-MSSA<br>X22 | CC692-MRSA<br>CKMM-401M | CC692-MSSA<br>NCTC9546 | 15V8707       | 511525-22     | V315          | IMT40427      |
|--------------------------|------------------------------------------------------------------------------------------------|-----------------------|------------------|------------------|-------------------|-------------------------|------------------------|---------------|---------------|---------------|---------------|
| DUF1270                  | DUF1270 domain-containing protein, replication or lysogeny module                              | SAAV_2055, KMD47_gp15 | 7835.. 7996      | 7835.. 7996      | 5689.. 5850       | 5688.. 5849             | 5996.. 6157            | 5996.. 6157   | 5996.. 6157   | 7665.. 7826   | 7665.. 7826   |
| DUF1108                  | conserved hypothetical protein                                                                 | SAAV_2054             | 8095.. 8355      | 8095.. 8355      | 5949.. 6209       | 5948.. 6208             | 6256.. 6516            | 6256.. 6516   | 6256.. 6516   | 8143.. 8403   | 8143.. 8403   |
| <i>sgr=gam</i>           | Chromosome segregation protein/host-nuclease inhibitor, Gam family protein, replication module | -                     | -                | -                | -                 | -                       | -                      | -             | -             | 8416.. 8952   | 8416.. 8952   |
| -                        | hypothetical protein                                                                           | SAAV_2053             | 8363.. 8599      | 8363.. 8599      | 6217.. 6453       | 6216.. 6452             | 6524.. 6760            | 6524.. 6760   | 6524.. 6760   | -             | -             |
| -                        | conserved hypothetical protein                                                                 | SAAV_2052             | 8622.. 9233      | 8622.. 9233      | 6476.. 7087       | 6475.. 7086             | 6783.. 7394            | 6783.. 7394   | 6783.. 7394   | -             | -             |
| -                        | conserved hypothetical protein                                                                 | SAAV_2051             | 9246.. 9569      | 9246.. 9569      | 7100.. 7423       | 7099.. 7422             | 7407.. 7730            | 7407.. 7730   | 7407.. 7730   | -             | -             |
| DUF1351_SAAV_2050        | hypothetical protein                                                                           | SAAV_2050             | 9580.. 10338     | 9580.. 10338     | 7434.. 8192       | 7433.. 8191             | 7741.. 8499            | 7741.. 8499   | 7741.. 8499   | -             | -             |
| <i>ssbP</i>              | single-stranded DNA-binding protein, replication module                                        | -                     | -                | -                | -                 | -                       | -                      | -             | -             | 9600.. 10043  | 9600.. 10043  |
| DUF0968                  | putative HNHc nuclease                                                                         | -                     | -                | -                | -                 | -                       | -                      | -             | -             | 10055.. 10750 | 10055.. 10750 |
| -                        | hypothetical protein                                                                           | SAAV_2049             | 10361.. 10996    | 10361.. 10996    | 8215.. 8850       | 8214.. 8849             | 8522.. 9157            | 8522.. 9157   | 8522.. 9157   | -             | -             |
| <i>pol_SAAV_2048</i>     | putative phage DNA polymerase                                                                  | SAAV_2048             | 11016.. 12749    | 11016.. 12749    | -                 | -                       | -                      | -             | -             | -             | -             |
| <i>primase_SAAV_2047</i> | putative phage primase                                                                         | SAAV_2047             | 12771.. 14627    | 12771.. 14627    | -                 | -                       | -                      | -             | -             | -             | -             |
| -                        | conserved hypothetical protein                                                                 | SAAV_2046             | 14624.. 14824    | 14624.. 14824    | -                 | -                       | -                      | -             | -             | -             | -             |
| -                        | hypothetical protein                                                                           | SAAV_2045             | 14890.. 15216    | 14890.. 15216    | -                 | -                       | -                      | -             | -             | -             | -             |
| <i>dnaC</i>              | DNA-replication/ATP-binding protein                                                            | -                     | -                | -                | -                 | -                       | -                      | -             | -             | 12239.. 13024 | 12239.. 13024 |
| <i>sri</i>               | staphylococcal replication inhibitor, replication module                                       | -                     | -                | -                | -                 | -                       | -                      | -             | -             | 13021.. 13179 | 13021.. 13179 |
| DUF3269                  | DUF3269 family protein, SACOL0345, replication module                                          | -                     | -                | -                | -                 | -                       | -                      | -             | -             | 13192.. 13413 | 13192.. 13413 |
| <i>rusA</i>              | RusA family crossover junction endodeoxyribonuclease, replication module                       | -                     | -                | -                | -                 | -                       | -                      | -             | -             | 13423.. 13831 | 13423.. 13831 |
| DUF3113                  | DUF3113 family protein, replication module                                                     | SAAV_2044             | 15685.. 15870    | 15685.. 15870    | 13523.. 13708     | 13522.. 13707           | 13828.. 14013          | 13830.. 14015 | 13830.. 14015 | 13831.. 14016 | 13831.. 14016 |
| <i>rep</i>               | XRE family regulatory protein/helix-turn-helix transcriptional repressor, lysogeny module      | -                     | -                | -                | -                 | -                       | 14014.. 14271          | 14016.. 14273 | 14016.. 14273 | -             | -             |
| -                        | hypothet protein                                                                               | -                     | 15871.. 16034    | 15871.. 16034    | 13709.. 13872     | 13708.. 13871           | 14283.. 14446          | 14285.. 14448 | 14285.. 14448 | -             | -             |
| <i>dbp</i>               | phi PVL ORF 50-like protein, replication module                                                | SAAV_2043, MW1917     | 15871.. 16230    | 15871.. 16230    | 13709.. 14068     | 13708.. 14067           | 14283.. 14642          | 14285.. 14644 | 14285.. 14644 | -             | -             |
| DUF1270                  | DUF1270 domain-containing protein, replication module                                          | SAAV_2042, KMD47_gp15 | 16315.. 16479    | 16315.. 16479    | 14069.. 14317     | 14068.. 14316           | 14643.. 14891          | 14645.. 14893 | 14645.. 14893 | 14717.. 14881 | 14717.. 14881 |
| DUF1024                  | hypothetical protein                                                                           | SAAV_2041             | 16494.. 16745    | 16494.. 16745    | 14332.. 14583     | 14331.. 14582           | 14906.. 15157          | 14908.. 15159 | 14908.. 15159 | 14896.. 15147 | 14896.. 15147 |

| Gene ID                  | Function / description                                                    | Locus-tags                    | CC5-MSSA<br>ED98 | CC5-MSSA<br>SA01 | CC692-MSSA<br>X22 | CC692-MRSA<br>CKMM-401M | CC692-MSSA<br>NCTC9546 | 15V8707       | 511525-22     | V315          | IMT40427      |
|--------------------------|---------------------------------------------------------------------------|-------------------------------|------------------|------------------|-------------------|-------------------------|------------------------|---------------|---------------|---------------|---------------|
| -                        | conserved hypothetical protein                                            | SAAV_2040                     | 16735.. 16977    | 16735.. 16977    | 14573.. 14815     | 14572.. 14814           | 15147.. 15389          | 15149.. 15391 | 15149.. 15391 | 15137.. 15379 | 15137.. 15379 |
| <i>dut</i>               | dUTP pyrophosphatase, replication module                                  | SAAV_2039                     | 16970.. 17506    | 16970.. 17506    | -                 | -                       | -                      | -             | -             | -             | -             |
| <i>rinB</i> _SaO11_00291 | transcriptional activator RinB, replication module                        | SaO11_00291                   | -                | -                | 15056.. 15169     | 15055.. 15168           | 15630.. 15743          | 15632.. 15745 | 15632.. 15745 | 15620.. 15733 | 15620.. 15733 |
| -                        | hypothet protein                                                          | -                             | -                | -                | 15195.. 15296     | 15194.. 15295           | 15769.. 15870          | 15771.. 15872 | 15771.. 15872 | 15759.. 15860 | 15759.. 15860 |
| DUF1381                  | DUF1381 domain-containing protein, replication module                     | SAAV_2038, KMD47_gp30         | 17543.. 17749    | -                | -                 | -                       | -                      | -             | -             | -             | -             |
| -                        | conserved hypothetical protein                                            | SAAV_2037                     | 17746.. 17988    | 17746.. 17988    | -                 | -                       | -                      | -             | -             | -             | -             |
| Q4ZCN3=DUF1514           | DUF1514 family protein/conserved putative protein                         | SAAV_2036                     | 17988.. 18188    | 17988.. 18188    | 15238.. 15438     | 15237.. 15437           | 15812.. 16012          | 15814.. 16014 | 15814.. 16014 | 15802.. 16002 | 15802.. 16002 |
| -                        | hypothetical protein                                                      | KMD47_gp40                    | -                | -                | 17020.. 17145     | 17019.. 17144           | 17594.. 17719          | 17596.. 17721 | 17596.. 17721 | 17584.. 17709 | 17584.. 17709 |
| <i>rinA</i>              | phage transcriptional regulator, RinA family protein                      | SAAV_2035                     | 18216.. 18632    | 18216.. 18632    | -                 | -                       | -                      | -             | -             | -             | -             |
| <i>nuc</i> -HNH          | HNH endonuclease family protein                                           | SAAV_2034                     | 18787.. 19101    | 18787.. 19101    | 17132.. 17446     | 17131.. 17445           | 17706.. 18020          | 17708.. 18022 | 17708.. 18022 | 17696.. 18010 | 17696.. 18010 |
| <i>terS</i> _MW1402      | phage terminase small subunit                                             | SAAV_2033                     | 19228.. 19533    | 19228.. 19533    | 17567.. 17872     | 17566.. 17871           | 18141.. 18446          | 18143.. 18448 | 18143.. 18448 | 18131.. 18436 | 18131.. 18436 |
| <i>terL</i> _MW1401      | putative phage terminase, large subunit                                   | SAAV_2032                     | 19523.. 21214    | 19523.. 21214    | 17862.. 19553     | 17861.. 19552           | 18436.. 20127          | 18438.. 20129 | 18438.. 20129 | 18426.. 20117 | 18426.. 20117 |
| <i>port</i> _SACOL0368   | phage portal protein, HK97 family), packaging module                      | SAAV_2031, SACOL0368          | 21411.. 22457    | 21411.. 22457    | 19750.. 20796     | 19749.. 20795           | 20324.. 21370          | 20326.. 21372 | 20326.. 21372 | 20314.. 21360 | 20314.. 21360 |
| <i>clpP</i> =Q5HIZ6      | Clp-protease/head maturation protein, packaging module/phage Clp protease | SAAV_2030                     | 22441.. 23214    | 22441.. 23214    | 20780.. 21553     | 20779.. 21552           | 21354.. 22127          | 21356.. 22129 | 21356.. 22129 | 21344.. 22117 | 21344.. 22117 |
| <i>macp</i>              | major capsid protein, head module                                         | SAAV_2029                     | 23226.. 24389    | 23226.. 24389    | 21565.. 22728     | 21564.. 22727           | 22139.. 23302          | 22141.. 23304 | 22141.. 23304 | 22129.. 23292 | 22129.. 23292 |
| -                        | hypothet protein                                                          | -                             | 24337.. 24447    | 24337.. 24447    | 22676.. 22786     | 22675.. 22785           | 23250.. 23360          | 23252.. 23362 | 23252.. 23362 | 23240.. 23350 | 23240.. 23350 |
| <i>htcp</i>              | head-tail adaptor Ad1                                                     | SAAV_2028, KMD47_gp47         | 24458.. 24736    | 24458.. 24736    | 22797.. 23075     | 22796.. 23074           | 23371.. 23649          | 23373.. 23651 | 23373.. 23651 | 23361.. 23639 | 23361.. 23639 |
| -                        | hypothetical protein                                                      | SAAV_2027, KMD47_gp48, MW1396 | 24748.. 25080    | 24748.. 25080    | 23087.. 23419     | 23086.. 23418           | 23661.. 23993          | 23663.. 23995 | 23663.. 23995 | 23651.. 23983 | 23651.. 23983 |
| <i>tnp</i> -Q6GH59       | IS3 family transposase                                                    | -                             | -                | -                | -                 | -                       | -                      | 24260.. 25827 | -             | -             | -             |
| -                        | hypothetical protein                                                      | SAAV_2026                     | 25077.. 25478    | 25077.. 25478    | 23416.. 23817     | 23415.. 23816           | 23990.. 24391          | -             | -             | 23980.. 24381 | 23980.. 24381 |
| DUF3168                  | DUF3168 domain-containing protein, head module                            | SAAV_2025, MW1394, KMD47_gp49 | 25479.. 25874    | 25479.. 25874    | 23818.. 24213     | 23817.. 24212           | 24392.. 24787          | 26057.. 26452 | 25007.. 25402 | 24382.. 24777 | 24382.. 24777 |
| <i>matp1</i>             | phage major tail protein                                                  | SAAV_2024                     | 25909.. 26550    | 25909.. 26550    | 24248.. 24891     | 24247.. 24888           | 24822.. 25463          | 26487.. 27128 | 25437.. 26078 | 24812.. 25453 | 24812.. 25453 |
| <i>matp2</i>             | phage major tail protein                                                  | SAAV_2023                     | 26642.. 27097    | 26642.. 27097    | 24983.. 25438     | 24980.. 25435           | 25555.. 26010          | 27220.. 27675 | 26170.. 26625 | 25545.. 26000 | 25545.. 26000 |
| -                        | putative protein, tail module                                             | SAAV_2022, KMD47_gp52         | 27155.. 27505    | 27155.. 27505    | 25496.. 25846     | 25493.. 25843           | 26068.. 26418          | 27733.. 28083 | 26683.. 27033 | 26058.. 26408 | 26058.. 26408 |
| -                        | putative protein                                                          | SAAV_2021, KMD47_gp53         | 27547.. 27705    | 27547.. 27705    | 25888.. 26046     | 25885.. 26043           | 26460.. 26618          | 28125.. 28283 | 27075.. 27233 | 26450.. 26608 | 26450.. 26608 |

| Gene ID                                  | Function / description                                                           | Locus-tags         | CC5-MSSA<br>ED98 | CC5-MSSA<br>SA01 | CC692-MSSA<br>X22 | CC692-MRSA<br>CKMM-401M | CC692-MSSA<br>NCTC9546 | 15V8707       | 511525-22     | V315          | IMT40427      |
|------------------------------------------|----------------------------------------------------------------------------------|--------------------|------------------|------------------|-------------------|-------------------------|------------------------|---------------|---------------|---------------|---------------|
| <i>tmpM3_SAAV_2020</i>                   | tail tape measure protein, tail module (un-truncated)                            | SAAV_2020          | 27719.. 33895    | 27719.. 33895    | 26060.. 32236     | 26057.. 32234           | 26632.. 32808          | -             | -             | 26622.. 32799 | 26622.. 32799 |
| <i>tmpM3_SAAV_2020</i> , first fragment  | tail tape measure protein, tail module (truncated by insertion, first fragment)  | SAAV_2020, partial | -                | -                | -                 | -                       | -                      | 28297.. 28619 | 27247.. 27569 | -             | -             |
| Q6GHB2                                   | putative protein                                                                 | -                  | -                | -                | -                 | -                       | -                      | 28667.. 28960 | 27617.. 27910 | -             | -             |
| -                                        | transposase                                                                      | KI244_10150        | -                | -                | -                 | -                       | -                      | 29117.. 29422 | 28067.. 28372 | -             | -             |
| -                                        | YdcP family protein                                                              | KI244_10155        | -                | -                | -                 | -                       | -                      | 29462.. 29797 | 28412.. 28747 | -             | -             |
| -                                        | putative protein                                                                 | KI244_11250        | -                | -                | -                 | -                       | -                      | 29801.. 30103 | 28751.. 29053 | -             | -             |
| <i>rstA</i>                              | phage replication initiation factor                                              | -                  | -                | -                | -                 | -                       | -                      | 30283.. 31359 | 29233.. 30309 | -             | -             |
| -                                        | conjugal transfer protein                                                        | KI244_10170        | -                | -                | -                 | -                       | -                      | 31520.. 32595 | 30470.. 31546 | -             | -             |
| -                                        | putative protein                                                                 | SAPIG1861          | -                | -                | -                 | -                       | -                      | 32600.. 32860 | 31551.. 31811 | -             | -             |
| <i>yddD_ED98</i>                         | conjugal transfer protein                                                        | -                  | -                | -                | -                 | -                       | -                      | 32866.. 33255 | 31817.. 32206 | -             | -             |
| <i>yddE_ED98</i>                         | ATP-binding protein                                                              | -                  | -                | -                | -                 | -                       | -                      | 33290.. 35785 | 32241.. 34736 | -             | -             |
| -                                        | putative protein                                                                 | SAPIG1858          | -                | -                | -                 | -                       | -                      | 35797.. 36015 | 34748.. 34966 | -             | -             |
| -                                        | putative protein                                                                 | SAPIG1857          | -                | -                | -                 | -                       | -                      | 36022.. 36249 | 34973.. 35200 | -             | -             |
| -                                        | putative protein                                                                 | SAPIG1856          | -                | -                | -                 | -                       | -                      | 36246.. 36579 | 35197.. 35529 | -             | -             |
| Q6GHC0                                   | cell division protein FtsK                                                       | -                  | -                | -                | -                 | -                       | -                      | 36584.. 37945 | 35534.. 36895 | -             | -             |
| -                                        | putative protein                                                                 | KI244_10210        | -                | -                | -                 | -                       | -                      | 37949.. 38116 | 36899.. 37066 | -             | -             |
| -                                        | putative protein                                                                 | KI244_10215        | -                | -                | -                 | -                       | -                      | 38135.. 38368 | 37085.. 37318 | -             | -             |
| A8Z131                                   | putative membrane protein                                                        | -                  | -                | -                | -                 | -                       | -                      | 38391.. 40322 | 37341.. 39272 | -             | -             |
| <i>traG</i>                              | putative transposase/transfer complex protein G                                  | -                  | -                | -                | -                 | -                       | -                      | 40312.. 41340 | 39262.. 40290 | -             | -             |
| A8Z129                                   | putative exported protein                                                        | -                  | -                | -                | -                 | -                       | -                      | 41346.. 41939 | 40296.. 40889 | -             | -             |
| DUF4467                                  | DUF4467 domain-containing (lipo-/cystatin-like) protein                          | -                  | -                | -                | -                 | -                       | -                      | 41986.. 42348 | 40936.. 41298 | -             | -             |
| -                                        | helix-turn-helix family protein                                                  | KI244_10240        | -                | -                | -                 | -                       | -                      | 42459.. 42971 | 41409.. 41921 | -             | -             |
| <i>tmpM3_SAAV_2020</i> , second fragment | tail tape measure protein, tail module (truncated by insertion, second fragment) | SAAV_2020, partial | -                | -                | -                 | -                       | -                      | 43696.. 49549 | 42646.. 48499 | -             | -             |
| -                                        | hypothet protein                                                                 | -                  | 31603.. 32109    | 31603.. 32109    | 29944.. 30450     | 29942.. 30448           | 30516.. 31022          | 47257.. 47763 | 46207.. 46713 | 30507.. 31013 | 30507.. 31013 |
| -                                        | hypothet protein                                                                 | -                  | 32757.. 32900    | 32757.. 32900    | 31098.. 31241     | 31096.. 31239           | 31670.. 31813          | 48411.. 48554 | 47361.. 47504 | 31661.. 31804 | 31661.. 31804 |
| Q4ZCS6                                   | putative bacteriophagal tail protein/holin                                       | SAAV_2019          | 33895.. 34719    | 33895.. 34719    | -                 | -                       | 32808.. 33641          | 49549.. 50373 | 48499.. 49323 | 32799.. 33623 | 32799.. 33623 |
| P18179_Tn552                             | ATP-binding protein for transposon Tn552                                         | -                  | -                | -                | 32949.. 33764     | 32947.. 33762           | -                      | -             | -             | -             | -             |
| <i>tnp_Tn552-1</i>                       | transposase for transposon Tn552                                                 | -                  | -                | -                | 33757.. 35201     | 33755.. 35197           | -                      | -             | -             | -             | -             |

| Gene ID               | Function / description                                                                             | Locus-tags                       | CC5-MSSA<br>ED98 | CC5-MSSA<br>SA01 | CC692-MSSA<br>X22 | CC692-MRSA<br>CKMM-401M | CC692-MSSA<br>NCTC9546 | 15V8707       | 511525-22     | V315          | IMT40427      |
|-----------------------|----------------------------------------------------------------------------------------------------|----------------------------------|------------------|------------------|-------------------|-------------------------|------------------------|---------------|---------------|---------------|---------------|
| <i>res</i>            | plasmid resolvase                                                                                  | -                                | -                | -                | 35173.. 35766     | 35169.. 35762           | -                      | -             | -             | -             | -             |
| <i>blaI</i>           | beta-lactamase repressor inhibitor                                                                 | -                                | -                | -                | 36029.. 36409     | 36026.. 36406           | -                      | -             | -             | -             | -             |
| <i>blaR</i>           | beta-lactam sensor/signal transducer BlaR                                                          | -                                | -                | -                | 36399.. 38153     | 36396.. 38153           | -                      | -             | -             | -             | -             |
| <i>blaZ</i>           | penicillin-hydrolyzing class A beta-lactamase BlaZ                                                 | -                                | -                | -                | 38260.. 39105     | 38260.. 39105           | -                      | -             | -             | -             | -             |
| <i>sitp_Q8SDP1</i>    | siphon tail protein/peptidase, tail module                                                         | SAAV_2018                        | 34728.. 36311    | 34728.. 36311    | 39618.. 41201     | 39618.. 41201           | 33650.. 35233          | 50382.. 51965 | 49332.. 50915 | 33632.. 35215 | 33632.. 35215 |
| -                     | putative protein, tail module                                                                      | SAAV_2017, MW1387, KMD47_gp57    | 36311.. 36601    | 36311.. 36601    | 41201.. 41491     | 41201.. 41491           | 35233.. 35523          | 51965.. 52255 | 50915.. 51205 | 35215.. 35505 | 35215.. 35505 |
| <i>mitp1</i>          | minor structure protein, tail module/hypothetical protein                                          | SAAV_2016, KMD47_gp58            | 36617.. 38527    | 36617.. 38527    | 41507.. 43417     | 41507.. 43417           | 35539.. 37449          | 52271.. 54181 | 51221.. 53131 | 35521.. 37431 | 35521.. 37431 |
| <i>bppU</i> =DUF2479  | BppU family baseplate upper protein                                                                | SAAV_2015, KMD47_gp59            | 38527.. 39993    | 38527.. 39993    | 43417.. 44883     | 43417.. 44883           | 37449.. 38915          | 54181.. 55647 | 53131.. 54597 | 37431.. 38897 | 37431.. 38897 |
| <i>mitp2</i> =DUF2977 | DUF2977 domain-containing protein/minor tail protein, tail module                                  | SAAV_2014, KMD47_gp60            | 39993.. 40382    | 39993.. 40382    | 44883.. 45272     | 44883.. 45272           | 38915.. 39304          | 55647.. 56036 | 54597.. 54986 | 38897.. 39286 | 38897.. 39286 |
| <i>xldX_SACOL0386</i> | XLdX family protein/putative protein TIGR01669                                                     | SAAV_2013, SACOL0386, KMD47_gp61 | 40375.. 40539    | 40375.. 40539    | 45265.. 45429     | 45265.. 45429           | 39297.. 39461          | 56029.. 56193 | 54979.. 55143 | 39279.. 39443 | 39279.. 39443 |
| Q9MBN6=DUF2951        | DUF2951 domain-containing protein, tail module                                                     | SAAV_2012                        | 40585.. 40884    | 40585.. 40884    | -                 | -                       | -                      | -             | -             | 39489.. 39788 | 39489.. 39788 |
| <i>txpA</i>           | type I toxin-antitoxin system, in which the antitoxin is a RNA, from <i>hly</i> -converting phages | -                                | 41118.. 41225    | 41118.. 41225    | 46437.. 46544     | 46437.. 46544           | 40469.. 40576          | 57200.. 57307 | 56151.. 56258 | 40022.. 40129 | 40022.. 40129 |
| <i>holA</i>           | holin                                                                                              | SAAV_2011                        | 41423.. 41725    | 41423.. 41725    | 46742.. 47044     | 46742.. 47044           | 40774.. 41076          | 57505.. 57807 | 56456.. 56758 | 40327.. 40629 | 40327.. 40629 |
| amidase               | putative amidase                                                                                   | SAAV_2010                        | 41736.. 43190    | 41736.. 43190    | 47055.. 48508     | 47055.. 48508           | 41087.. 42540          | 57818.. 59271 | 56769.. 58222 | 40640.. 42094 | 40640.. 42094 |
| D0K6J9-bird           | novel bird associated caax amino protease family protein, putative membrane protein                | SAAV_2009                        | 43535.. 44275    | 43535.. 44275    | 48853.. 49593     | 48853.. 49593           | 42885.. 43625          | 59616.. 60356 | 58536.. 59276 | 42439.. 43179 | 42439.. 43179 |
| D0K6J8-bird           | novel bird associated ornithine cyclodeaminase                                                     | SAAV_2008                        | 44952.. 45905    | 44952.. 45905    | 50269.. 51222     | 50269.. 51222           | 44301.. 45254          | 61032.. 61985 | 59905.. 60858 | 43855.. 44808 | 43855.. 44808 |
